## **Distinct effects of single plant-based vs. animal-based meals on satiety and mood revealed by real-world smartphone-embedded studies**

Evelyn Medawar<sup>1,2,3</sup>, Marie Zedler<sup>1</sup>, Larissa de Biasi<sup>1</sup>, Arno Villringer<sup>1,2,3,4</sup>, A. Veronica Witte<sup>1,4</sup>

<sup>1</sup> Department of Neurology, Max Planck Institute for Human Cognitive and Brain Sciences, Leipzig, Germany

<sup>2</sup> Berlin School of Mind and Brain, Humboldt-Universität zu Berlin, Germany

<sup>3</sup> Charité - Universitätsmedizin Berlin; Humboldt-Universität zu Berlin, Germany

<sup>4</sup> Clinic for Cognitive Neurology, University of Leipzig Medical Center, Leipzig, Germany

Corresponding author: Evelyn Medawar, Department of Neurology, Max Planck Institute for Human Cognitive and Brain Sciences, Stephanstr. 1A, 04103 Leipzig, Germany, [medawar@cbs.mpg.de](mailto:medawar@cbs.mpg.de)

Keywords: plant-based, animal-based, single-meal, hunger, satiety, mood, planetary health diet, smartphone-based, online study

## **Abstract (250 words)**

Adopting plant-based diets high in fiber may reduce global warming and obesity prevalence. Physiological and psychological determinants of plant-based food decision-making remain unclear, particularly in real-life settings. As fiber has been linked with improved gut-brain signaling, we hypothesized that a single plant-based compared to an animal-based meal, would induce higher satiety, higher mood and less stress.

In three smartphone-based studies adults ( $n_{\text{all}} = 16,379$ ) ranked satiety and mood on 5/10-point Likert scales before and after meal intake. Statistical analyses comprised linear mixed models, extended by nutrient composition, taste ratings, gender, social interaction, type of decision and dietary adherence to consider potential confounding.

Overall, meal intake induced satiety and higher mood. Against our hypotheses, plant-based meal choice did not explain differences in hunger after the meal. Considering mood, individuals choosing a plant-based meal reported slightly higher mood before the meal and smaller mood increases after the meal compared to those choosing animal-based meals (post-meal\*plant-based:  $b = -0.06$ ,  $t = -3.6$ , model comparison  $p < .001$ ). Protein content marginally mediated post-meal satiety, while gender and taste ratings had a strong effect on satiety and mood in general.

In this series of large-scale online studies, we could not detect profound effects of plant-based vs. animal-based meals on satiety and mood. Instead of meal category, satiety and mood depended on taste and protein content of the meal, as well as dietary habits and gender. Our findings might help to develop strategies to increase acceptability of healthy and sustainable plant-based food choices.

## **Significance Statement (120 words)**

Despite increasing awareness of plant-based diets as lifestyle- and climate-friendly option, the effects of plant-based meals on physiology and psychology remain largely understudied. Real-world large-scale studies looking at differential effects of plant-based vs. animal-based meals are missing. Yet, investigating the effects of meal category will help to understand underlying decision-making strategies and inform governmental policies and individual meal choices. In three large-scale online studies set in a real-world environment with over 16,000 datapoints, we showed that meal category had minor impact only on post-meal satiety and mood ratings compared to timepoint and demographic factors. We propose that our findings should be considered when designing cafeteria menus, by increasing taste and protein content, in particular of plant-based meals, in (university) cafeterias.

## Introduction

Plant-based diets, high in fiber (i.e., non-digestible carbohydrates) stemming from grain products, bread, potatoes, vegetables, legumes and fruits, are linked with planetary [1, 2] and human health [3, 4]. An extensive meta-analysis showed that higher intake of food items rich in dietary fiber mediates the benefits of healthy lifestyles on non-communicable diseases such as obesity in a dose-response relationship [5]. Consequently, increasing daily fiber intake from today's ~15 g to 50 g on a global scale, but in particular in Westernized diets, has been proposed to lead to overall extended lifespan and reduced health-care costs [6]. Eventually, adopting more plant-based diets on a global scale could thus in the long run help to counter ever-increasing rates of obesity and greenhouse gas emissions likewise. Knowledge on the physiological and psychological factors, including hunger, mood, food availability and culture, that link with plant-based food decision-making remain however surprisingly largely understudied.

On the one hand, several „bottom-up“ physiological mechanisms, prompted by ingested nutrients and processed in the brain, have been proposed to mediate acute metabolic effects signaling post-prandial satiety, reward and contentment, but also long-term metabolic (dys-)regulation and (de-)sensitization [7]. Macronutrient content most likely modulates appetite control, as energy density or protein content of a single meal determines subsequent metabolic activity [8, 9] and in turn influences future meal intake via gut-brain hormonal signaling [10]. Indeed, repetitive cueing with highly palatable foods led to habituation of reward-associated dopaminergic signaling [11]. In contrast to high caloric foods, dietary fiber not only moderately improved body weight status independent of energy intake across 62 trials [12], but also activates appetite-regulatory pathways via anorectic hormones, thereby ameliorating high-caloric food craving and other psychobiological processes [13]. While the timeframe of those putative effects remain unclear [14], fiber and polyunsaturated fats may contribute to healthy feeding-related signaling and neuronal survival, for example by improving glucose and insulin metabolism, by balancing energy homeostasis through protecting hypothalamic neurons from inflammation [15] or by contributing to a healthy energy-harvesting profile of the gut microbiome [16].

On the other hand, „top-down“ psychological mechanisms include for instance (un-)successful self-control and cognitive strategies towards health or moral goals help to make choices aligned with inner beliefs and self-reinforce dietary habits. Those choices are planned not impulsive, and in the case of food decision-making may often - but not always (e.g. in the case of eating disorders) - lead to healthier food choices [17]. In the case of vegetarians and vegans, restrictive eating has been linked with higher risk for depressive symptoms (meta-analysis of n ~50k participants [18]). Determinants and timeframe and also the reasons for the potential link between restrictive diets and depressive mood remain unclear and might include social exclusion, isolation or stigma in the long term. Conversely, healthy and adequate nutrient intake, including high fiber intake, has been associated with lower depressive symptoms and anxiety in observational (meta-analysis, [19]) and interventional studies ([20]), potentially via microbiota-driven modification of gene expression and anti-inflammatory properties [21]. Overall, reverse causation for food-mood relationships remains an unsolved issue [22] and whether single meals different in fiber content affect mood remains unclear.

Targeting food choice environment such as labeling, reducing portion size, imposing taxes and modifying availability are common tools to modulate food decision-making [23]. For instance, a recent study in university cafeterias doubled the availability of vegetarian meals, which led to an increase of 41-79% sales of plant-based meals across over 90k meals, without a drop in overall sales [24]. Sales and attractiveness increased when product packaging included labels that prompt sensory or contextual experiences, which was found to be less frequent for plant-based

products [25]. Yet, besides shaping food choice internally and externally, perceived physiological and psychological effects of such decisions and meal intakes remain unknown.

In sum, plant-based diets high in fiber resemble the current diet of choice for climate reasons, and some, but not all, interventional studies and meta-analyses raise the hypothesis that plant-based diets contribute to better maintenance of gut-brain signaling including satiety regulation and food reward sensitivity through nutrient-related improvements in metabolic factors. Only few studies however report significant effects of a single plant-based meal on post-prandial satiety and mood, and which factors modify this relation. To address these questions, we aimed to determine satiety and mood before and after a single plant-based (vegetarian, vegan) meal or, as a comparison, animal-based (fish, meat) meal served in university cafeterias providing a broad selection of different meals in the same environment in a demographically homogeneous population. To this end, we designed a series of novel smartphone-based studies: firstly, a large-scale study with free meal choice covering most of German university cafeterias, secondly, a study focusing on a smaller, deeply phenotyped sample of omnivorous individuals with free meal choice, and thirdly, a follow-up study of the latter with random allocation of meals.

We hypothesized that a plant-based meal will lead to higher satiety, better mood and less stress compared to an animal-based meal based on larger fiber content and pre-registered our analysis plan at the open science framework ([osf.io](https://osf.io)). In addition, we explored whether a voluntary decision to eat a plant-based meal (vegetarian or vegan) compared to an animal-based meal will be more frequently made upon planned (vs. impulsive) decisions, and if higher fiber content in the meals will mediate higher mood and satiety and lower stress, whereas higher unrefined sugar and fat content will mediate the opposite. The former potential effects will be masked in participants that followed, and in particular in those that also disliked, a non-voluntary decision of meal category. Additionally, we explored other demographic factors that might influence food choice, such as gender, socioeconomic status, sleep and habitual eating habits.

## Results

### Sample size, dietary habits and gender distribution

In total 16,135 observations were included in the analysis after data curation for the app study (predominant dietary habits according to self-report: omnivorous,  $n = 11,600$ , vegetarian,  $n = 3,456$ , vegan,  $n = 911$ ), as well as 173 in sub-study two and 71 in sub-study three (all omnivorous). Reported meals were 47-61% animal-based across studies. Two of the most frequent meals were pasta and currywurst, for study design and exemplary cafeteria meals, see **Figure 1**. Sample size dropped for exploratory data analysis due to missing data (**SI Figure 1**).

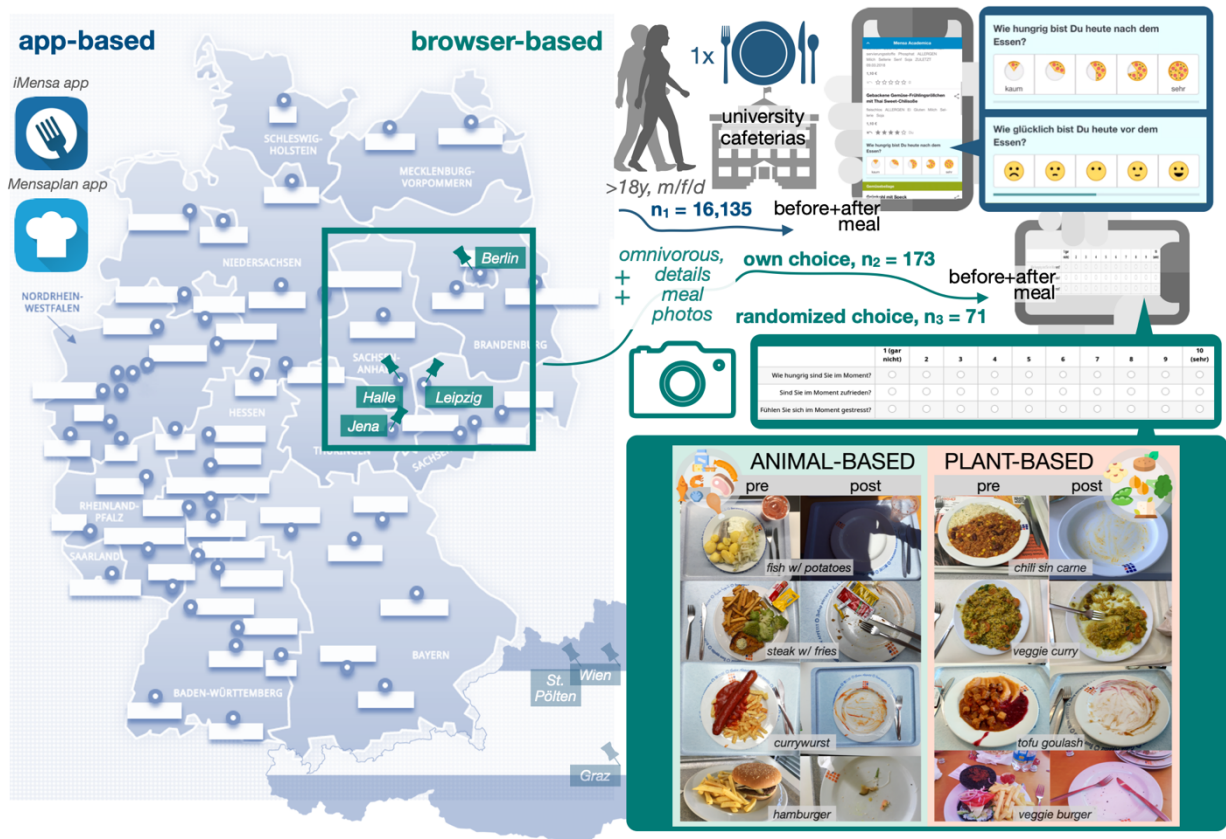

Figure 1: Study design: Adults (m, f, d) consuming a single meal in university cafeterias rated hunger and mood using Likert scales before and after that meal with smartphones or mobile devices, in an app study ( $n_1 = 16,135$ , 5-point scales, in dark blue) or in a more detailed web-based survey (omnivorous diet habits only, 10-point scales,  $n_2 = 173$ : free choice,  $n_3 = 71$ : randomized choice; in petrol). Photos show exemplanary pre- and post-meal plates for both meal categories (in petrol). Screenshots taken from iMensa app directly and meal photos provided by study participants (available at <https://osf.io/mqc5d/>). Germany map adapted from <https://www.studentenwerke.de/de/landkarte>.

For details about demographic and other parameters see **Figure 2** and **Table 1**. Briefly, in the app study omnivorous dieters chose an animal-based meal more frequently (69%) and vegetarians and vegans mostly chose plant-based meals (84%) ( $X^2(2) = 3679.3$ ,  $p < 2.2 \times 10^{-16}$ ). Note, that a substantial proportion of those reporting to eat predominantly vegan/vegetarian chose an animal-based meal (16%). On average, women were more likely to choose a plant-based meal (app study:  $X^2 = 731.4$ ,  $p < 10^{-10}$ , female = 58%, diverse = 45.3%, male = 37.3%; sub-study 2: female = 65%, diverse = 2%, male = 33%; sub-study 3: allocation was randomized). Both female and diverse gender reported more than twice as often predominantly vegan/vegetarian dietary habits compared to male in the app study ( $X^2 = 1266$ ,  $p < 10^{-10}$ , female = 40.4%, diverse = 54.8%, male = 16.5%). In sub-study 2, neither body mass index (BMI), income or general well-being differed across meal categories ( $p_{\text{all}} > 0.26$ ). Omnivorous dieters choosing a plant-based meal were characterized by significantly higher habitual fiber intake ( $22 \pm 11$  vs.  $18 \pm 9$  g fiber / day,  $p < 0.05$ ) and marginally higher scores for cognitive restraint and hunger in the TFEQ subscales ( $p < 0.05$ ) compared to those choosing animal-based meals (**Table 1**). No differences in personality traits or general well-being were found. Respective differences were not significant for the randomized allocation samples in sub-study 3.

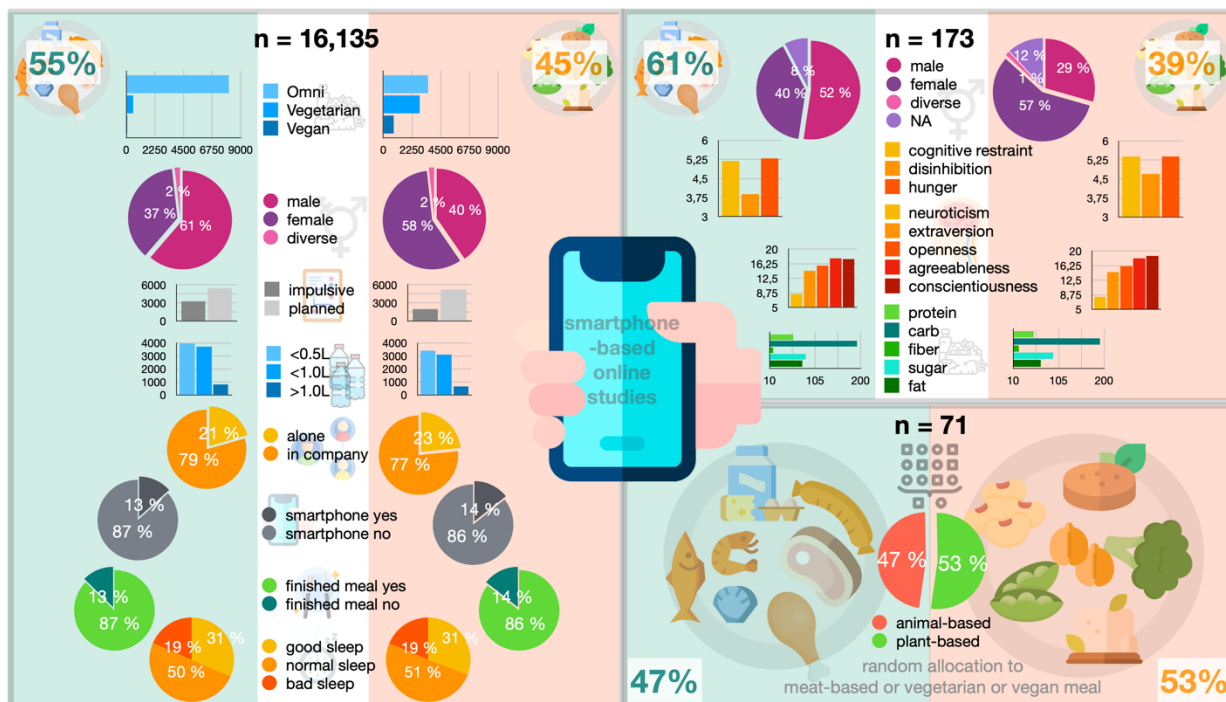

Figure 2: Demographic factors and study sample descriptives of sub-studies 1, 2 and 3. Image rights: Freepik (smartphone, diet, water, network, eat, clock, broccoli, tofu, peas, chickpea, soy, vegan, sausage, chop, food), Smashicons (brain), DinosoftLabs (chicken leg), surgan (seafood).

Table 1: Demographic information across studies according to meal choice. Significant differences according to Chi-tests or Wilcoxon tests between meal categories are marked in bold.

| Variable                              | app-based<br>n = 16,135                                    |                                                             |                                                                |
|---------------------------------------|------------------------------------------------------------|-------------------------------------------------------------|----------------------------------------------------------------|
|                                       | animal-based meal                                          | plant-based meal                                            | Chi-test / Wilcoxon test between meal categories               |
| <b>Dietary adherence</b>              | <b>Omnivorous: 8053<br/>Vegetarian: 576<br/>Vegan: 116</b> | <b>Omnivorous: 3546<br/>Vegetarian: 2879<br/>Vegan: 794</b> | <b>X<sup>2</sup> (2) = 3679.3, p &lt; 2.2x10<sup>-16</sup></b> |
| <b>Gender</b>                         | <b>3233 F<br/>5368 M<br/>155 D</b>                         | <b>4185 F<br/>2923 M<br/>124 D</b>                          | <b>X<sup>2</sup> (2) = 731.4, p &lt; 2.2x10<sup>-10</sup></b>  |
| <b>Impulsive vs. planned decision</b> | <b>impulsive: 3279<br/>planned: 5457</b>                   | <b>impulsive: 1997<br/>planned: 5222</b>                    | <b>X<sup>2</sup> (1) = 173.6, p &lt; 2.2x10<sup>-16</sup></b>  |
| <b>Drinking volume last 2h</b>        | <0.5L: 4175<br><1.0L: 3706<br>>1.0L: 807                   | <0.5L: 3403<br><1.0L: 3131<br>>1.0L: 646                    | X <sup>2</sup> (2) = 1.6, p = 0.46                             |
| <b>Social interaction during meal</b> | <b>alone: 1783<br/>in company: 6876</b>                    | <b>alone: 1675<br/>in company: 5484</b>                     | <b>X<sup>2</sup> (1) = 17.9, p &lt; 2.3 10<sup>-5</sup></b>    |
| <b>Smartphone use during meal</b>     | yes: 1156<br>no: 7481                                      | yes: 1019<br>no: 6121                                       | X <sup>2</sup> (1) = 2.5, p = 0.11                             |
| <b>Finished meal</b>                  | <b>yes: 7746<br/>no: 1123</b>                              | <b>yes: 6081<br/>no: 1025</b>                               | <b>X<sup>2</sup> (1) = 5.9, p = 0.0153</b>                     |
| <b>Sleep last night</b>               | good: 2674<br>normal: 4245<br>bad: 1576                    | good: 2157<br>normal: 3555<br>bad: 1308                     | X <sup>2</sup> (2) = 1.1, p = 0.59                             |

Abbreviations: N.A.: no answer; F: female; D: diverse; M: male

| Variable                                                               | study 2 (free choice)<br>n=173 (FFQ: n = 108, NEOFFI: n = 98, TFEQ: n = 91)                |                                                                                            |                                                                                                                | study 3 (randomized choice)<br>n=71 (FFQ: n = 52, NEOFFI: n = 49, TFEQ: n = 43)        |                                                                                        |                                                                                                                |
|------------------------------------------------------------------------|--------------------------------------------------------------------------------------------|--------------------------------------------------------------------------------------------|----------------------------------------------------------------------------------------------------------------|----------------------------------------------------------------------------------------|----------------------------------------------------------------------------------------|----------------------------------------------------------------------------------------------------------------|
|                                                                        | animal-based meal                                                                          | plant-based meal                                                                           | Chi-test / Wilcoxon test between meal categories                                                               | animal-based meal                                                                      | plant-based meal                                                                       | Chi-test / Wilcoxon test between meal categories                                                               |
| <b>Dietary adherence</b>                                               | Omnivorous: 173<br>Vegetarian: 0<br>Vegan: 0                                               | Omnivorous: 173<br>Vegetarian: 0<br>Vegan: 0                                               | -                                                                                                              | Omnivorous: n = 71<br>Vegetarian: n = 0<br>Vegan: n = 0                                | Omnivorous: n = 71<br>Vegetarian: n = 0<br>Vegan: n = 0                                | -                                                                                                              |
| <b>Gender</b>                                                          | <b>42 F</b><br><b>55 M</b><br><b>0 D</b><br><b>8 N.A.</b>                                  | <b>39 F</b><br><b>20 M</b><br><b>1 D</b><br><b>8 N.A.</b>                                  | <b>X<sup>2</sup> (2) = 9.2, p = 0.01</b>                                                                       | 19 F<br>12 M<br>0 D<br>5 N.A.                                                          | 22 F<br>10 M<br>0 D<br>3 N.A.                                                          | X <sup>2</sup> (1) = 0.13, p = 0.72                                                                            |
| <b>Income (categorical)</b>                                            | <500€: 30<br>500-1000€: 33<br>1000-1500€: 16<br>1500-2000€: 4<br>2000-2500€: 4<br>N.A.: 18 | <500€: 17<br>500-1000€: 28<br>1000-1500€: 10<br>1500-2000€: 1<br>2000-2500€: 0<br>N.A.: 12 | X <sup>2</sup> (4) = 4.7, p = 0.32                                                                             | <500€: 13<br>500-1000€: 12<br>1000-1500€: 4<br>1500-2000€: 0<br>2000-2500€: 0<br>NA: 7 | <500€: 14<br>500-1000€: 14<br>1000-1500€: 1<br>1500-2000€: 0<br>2000-2500€: 0<br>NA: 6 | X <sup>2</sup> (2) = 2.0, p = 0.37                                                                             |
| <b>Body-mass-index (BMI) (self-reported)</b>                           | 22.3 ± 2.4 kg/m <sup>2</sup>                                                               | 22.2 ± 2.6 kg/m <sup>2</sup>                                                               | X <sup>2</sup> (140) = 143.6, p = 0.40                                                                         | 22.6 ± 2.7                                                                             | 23.1 ± 4.6                                                                             | X <sup>2</sup> (57) = 58.3, p = 0.42                                                                           |
| <b>Finished meal</b>                                                   | yes: 71<br>no: 31<br>N.A.: 3                                                               | yes: 48<br>no: 16<br>N.A.: 4                                                               | X <sup>2</sup> (1) = 0.33, p = 0.57                                                                            | yes: 25<br>no: 11                                                                      | yes: 22<br>no: 13                                                                      | X <sup>2</sup> (1) = 0.11, p = 0.74                                                                            |
| <b>Drinking volume last 2h</b><br>Water<br>Tea<br>Coffee               |                                                                                            |                                                                                            | X <sup>2</sup> (3) = 0.9, p = 0.82<br>X <sup>2</sup> (2) = 1.8, p = 0.41<br>X <sup>2</sup> (1) = 1.3, p = 0.25 |                                                                                        |                                                                                        | X <sup>2</sup> (2) = 2.7, p = 0.26<br>X <sup>2</sup> (2) = 0.1, p = 0.93<br>X <sup>2</sup> (2) = 4.9, p = 0.09 |
| <b>Side dishes</b>                                                     | sides: 25<br>desserts: 10<br>other: 6                                                      | sides: 7<br>desserts: 12<br>other: 7                                                       |                                                                                                                | sides: 5<br>desserts: 2<br>other: 1                                                    | sides: 6<br>desserts: 4<br>other: 3                                                    |                                                                                                                |
| <b>General well-being (WHO-5)</b>                                      | 14.3 ± 4.5                                                                                 | 15.7 ± 4.3                                                                                 | X <sup>2</sup> (21) = 24.7, p = 0.26                                                                           | 15.1 ± 4.2                                                                             | 13.7 ± 4.1                                                                             | X <sup>2</sup> (16) = 14.6, p = 0.56                                                                           |
| <b>Eating traits (n = 108)</b><br>Cognitive restraint<br>Disinhibition | <b>5.2 ± 4.2</b><br>3.9 ± 2.7                                                              | <b>5.4 ± 3.7</b><br>4.7 ± 2.5                                                              | <b>X<sup>2</sup> (14) = 28.0, p = 0.014</b><br>X <sup>2</sup> (11) = 16.0, p = 0.14                            | 5.5 ± 4.1<br>5.3 ± 3.4                                                                 | 5.5 ± 4.1<br>5.2 ± 3.1                                                                 | X <sup>2</sup> (14) = 7.2, p = 0.93<br>X <sup>2</sup> (12) = 18.1, p = 0.11                                    |



|                                       |                  |                  |                                             |            |            |                                      |
|---------------------------------------|------------------|------------------|---------------------------------------------|------------|------------|--------------------------------------|
| Hunger                                | <b>5.3 ± 3.0</b> | <b>5.4 ± 2.8</b> | <b>X<sup>2</sup> (12) = 22.1, p = 0.037</b> | 5.5 ± 2.7  | 5.7 ± 3.5  | X <sup>2</sup> (11) = 4.5, p = 0.95  |
| <b>Personality traits (n = 98)</b>    | 8.4 ± 4.7        | 8.2 ± 3.7        | X <sup>2</sup> (18) = 24.3, p = 0.15        | 9.2 ± 5.2  | 10.2 ± 5.1 | X <sup>2</sup> (17) = 18.0, p = 0.39 |
| Neuroticism                           | 14.4 ± 3.9       | 14.6 ± 3.5       | X <sup>2</sup> (17) = 20.1, p = 0.23        | 13.0 ± 4.4 | 13.2 ± 3.2 | X <sup>2</sup> (16) = 8.3, p = 0.94  |
| Extraversion                          | 15.8 ± 5.3       | 16.1 ± 5.4       | X <sup>2</sup> (20) = 24.5, p = 0.22        | 13.2 ± 5.4 | 16.5 ± 5.6 | X <sup>2</sup> (20) = 21.0, p = 0.40 |
| Openness                              | 17.6 ± 4.3       | 18.2 ± 3.8       | X <sup>2</sup> (17) = 13.0, p = 0.74        | 16.6 ± 4.9 | 17.4 ± 5.4 | X <sup>2</sup> (18) = 14.3, p = 0.71 |
| Agreeableness                         | 17.5 ± 4.1       | 18.8 ± 3.7       | X <sup>2</sup> (15) = 17.5, p = 0.29        | 18.3 ± 4.1 | 17.6 ± 4.1 | X <sup>2</sup> (15) = 10.2, p = 0.81 |
| <b>Regular eating habits (n = 91)</b> | 1563 ± 600       | 1493 ± 553       | W = 1073, p = 0.6746                        | 1445 ± 586 | 1426 ± 582 | W = 237, p = 0.8948                  |
| Energy (kcal)                         | 60 ± 27          | 54 ± 26          | W = 1164, p = 0.2512                        | 58 ± 30    | 54 ± 28    | W = 255, p = 0.5717                  |
| Protein (g)                           | 192 ± 74         | 192 ± 71         | W = 1002, p = 0.8887                        | 177 ± 74   | 174 ± 68   | W = 232, p = 0.9904                  |
| Carbohydrates (g)                     | <b>18 ± 9</b>    | <b>22 ± 11</b>   | <b>W = 720, p = 0.01663</b>                 | 16 ± 8     | 18 ± 11    | W = 223, p = 0.8569                  |
| Fiber (g)                             | 86 ± 53          | 94 ± 53          | W = 864, p = 0.2137                         | 75 ± 40    | 72 ± 49    | W = 259, p = 0.5079                  |
| Sugar (g)                             | 79 ± 53          | 68 ± 39          | W = 1139, p = 0.3434                        | 60 ± 33    | 80 ± 57    | W = 228, p = 0.9521                  |
| Fat (g)                               | 165 ± 259        | 174 ± 314        | X <sup>2</sup> (14) = 16.7, p = 0.27        | 90 ± 153   | 82 ± 203   | X <sup>2</sup> (8) = 5.8, p = 0.67   |
| Coffee (ml)                           |                  |                  |                                             |            |            |                                      |

Abbreviations: N.A.: no answer; F: female; D: diverse; M: male

## Pre-registered main analysis

### Effect of meal category on hunger, mood and stress

In the app-study, in contrast to our hypothesis, there was no significant interaction effect of meal category and timepoint for hunger ( $p = 0.2$ , **Figure 3A, Table 2**). While individuals choosing a plant-based meal reported lower hunger on average (main effect,  $\sim -1/10$ th points,  $b = -0.10$ ,  $t = -6.8$ , model comparison  $p < .001$ ) independent of meal category, average hunger dropped around 2 points on the 5-point Likert scale in both conditions (main effect,  $b = -1.99$ ,  $t = -179.4$ ,  $p < 0.001$ ). Considering mood, contrary to our hypothesis, post-meal mood increased  $\sim 2/5$ th points less for individuals choosing a plant-based meal compared to an animal-based meal (interaction effect, post-meal\*plant-based:  $b = -0.06$ ,  $t = -3.6$ , model comparison  $p < .001$ , **Figure 3B**). In parallel, mood was slightly higher in individuals eating a plant-based meal before the meal (animal-based:  $3.48 \pm 1$  points vs. plant-based:  $3.52 \pm 1$  points) and increased in all individuals after the meal (animal-based:  $+0.26$  points, plant-based:  $+0.20$  points). For sub-studies 2 and 3 no significant interaction effects on hunger or mood were observed. There was no significant main or interaction effects for stress. Average values and valence of betas of the effects of interest appeared similar to the app-study (for comparison of mean values see **Figure 3C-D, Table 2**).

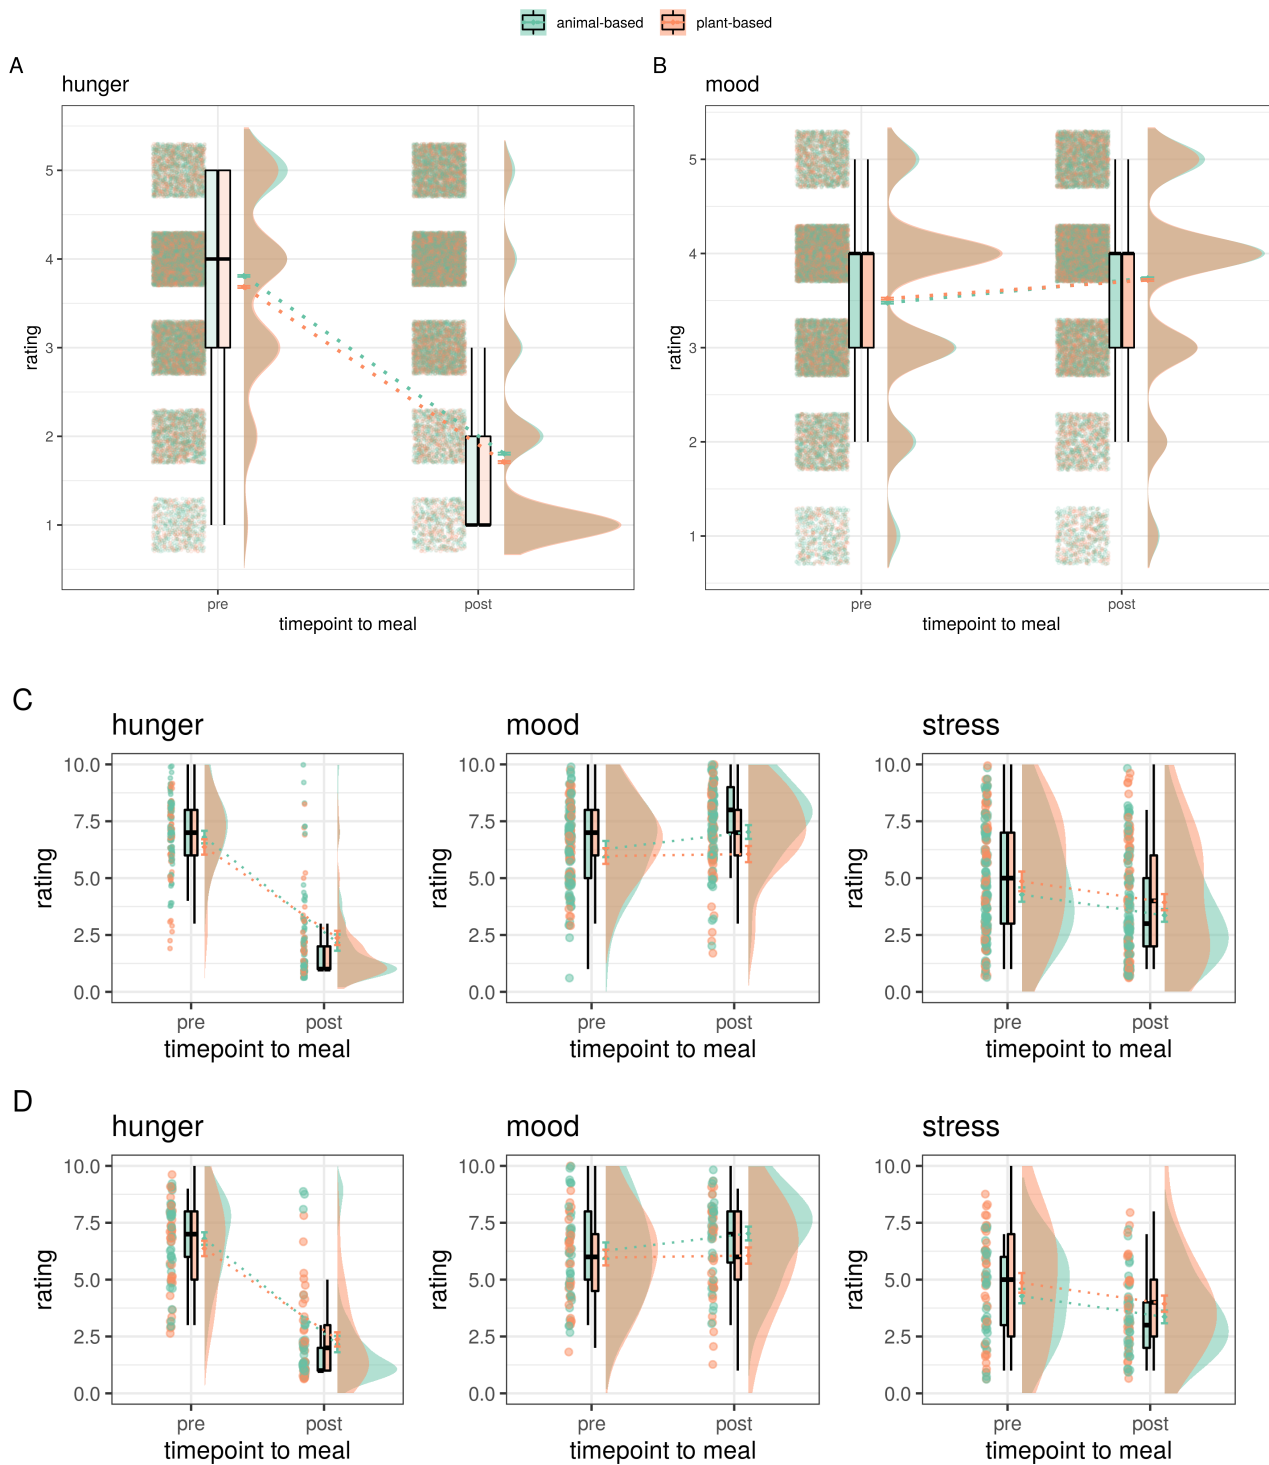

Figure 3: Mean ratings of pre- and post-meal meal category for hunger, mood/contentment and stress.

App-study ratings (n = 16135) depicted in A) hunger B) mood, C) sub-study 2 with free meal choice (n=173) and D) sub-study 3 with randomized meal allocation (n=78). Median depicted as line, mean as dot, outliers (according to interquartile rule) as triangles.

Table 2: Ratings for hunger, mood, stress across all studies. Mean  $\pm$  SD. Significant models of interest compared to null model in bold (LMM comparison  $p < 0.001$ ).

|                                          | hunger                                                                        |                | mood                                                                        |                | stress                                               |               |
|------------------------------------------|-------------------------------------------------------------------------------|----------------|-----------------------------------------------------------------------------|----------------|------------------------------------------------------|---------------|
|                                          | animal-based                                                                  | plant-based    | animal-based                                                                | plant-based    | animal-based                                         | plant-based   |
| <b>app-based (5-point) n = 16135</b>     |                                                                               |                |                                                                             |                |                                                      |               |
| pre                                      | 3.81 $\pm$ 1.1                                                                | 3.69 $\pm$ 1.1 | 3.48 $\pm$ 1.0                                                              | 3.52 $\pm$ 1.0 | -                                                    | -             |
| post                                     | 1.80 $\pm$ 1.2                                                                | 1.71 $\pm$ 1.1 | 3.74 $\pm$ 1.0                                                              | 3.72 $\pm$ 1.0 | -                                                    | -             |
| main effect plant-based vs. animal-based | <b>b = - 0.10, t = - 6.8</b><br><b>model comparison</b><br><b>p &lt; .001</b> |                | <b>b = 0.01, t = 0.80</b><br><b>model comparison</b><br><b>p &lt; .001</b>  |                | -                                                    | -             |
| Interaction effect plant-based*post-meal | b = 0.03, t = 1.3<br>model comparison<br>p = 0.20                             |                | <b>b = -0.06, t = -3.6</b><br><b>model comparison</b><br><b>p &lt; .001</b> |                | -                                                    | -             |
| <b>study 2 (10-point) n=173</b>          |                                                                               |                |                                                                             |                |                                                      |               |
| pre                                      | 7.28 $\pm$ 1.4                                                                | 6.87 $\pm$ 1.8 | 6.6 $\pm$ 1.9                                                               | 6.7 $\pm$ 1.7  | 4.8 $\pm$ 2.4                                        | 5.2 $\pm$ 2.5 |
| post                                     | 1.98 $\pm$ 2.0                                                                | 1.85 $\pm$ 1.5 | 7.6 $\pm$ 1.6                                                               | 7.1 $\pm$ 1.8  | 3.7 $\pm$ 2.2                                        | 4.2 $\pm$ 2.6 |
| main effect plant-based vs. animal-based | b = - 0.27, t = - 1.4<br>model comparison<br>p < .17                          |                | b = - 0.18, t = - 0.79<br>model comparison<br>p < .43                       |                | b = 0.46, t = 1.3<br>model comparison<br>p < .18     |               |
| Interaction effect plant-based*post-meal | b = 0.28, t = 0.8<br>model comparison<br>p = 0.42                             |                | b = -0.68, t = - 2.3<br>model comparison<br>p < .0196                       |                | b = 0.08, t = 0.3<br>model comparison<br>p = 0.80    |               |
| <b>study 3 (10-point) n=71</b>           |                                                                               |                |                                                                             |                |                                                      |               |
| pre                                      | 6.7 $\pm$ 1.7                                                                 | 6.6 $\pm$ 1.9  | 6.2 $\pm$ 2.1                                                               | 6.1 $\pm$ 2.1  | 4.4 $\pm$ 1.9                                        | 4.9 $\pm$ 2.5 |
| post                                     | 2.1 $\pm$ 2.1                                                                 | 2.4 $\pm$ 1.9  | 7.0 $\pm$ 1.8                                                               | 6.2 $\pm$ 2.2  | 3.4 $\pm$ 1.7                                        | 4.0 $\pm$ 2.2 |
| main effect plant-based vs. animal-based | b = - 0.11, t = - 0.4<br>model comparison<br>p < .71                          |                | b = -0.64, t = -1.5<br>model comparison<br>p < .12                          |                | b = 0.58, t = 1.3<br>model comparison<br>p < .18     |               |
| Interaction effect plant-based*post-meal | b = -0.64, t = -1.0<br>model comparison<br>p = 0.32                           |                | b = -0.66, t = -1.4<br>model comparison<br>p < .17                          |                | b = 0.002, t = 0.005<br>model comparison<br>p < .996 |               |

Significant effects between linear mixed models model comparisons are marked in bold.

## Pre-registered secondary analysis

To further investigate underlying physiological and psychological factors explaining the effects on hunger and mood overall and by meal category, we extended the main analysis and included macronutrient composition available in a subset of datapoints, taste ratings and additionally subdivided the dataset by gender and by dietary adherence (in the app study only). Also, we explored if random allocation to a meal, suppressing free choice, would mask any effects.

### Nutrient composition and satiety

Macronutrients between meal categories were not significantly different for energy content and saturated fats, but significantly different for carbohydrates, sugar, fat and protein (all Wilcoxon  $p < 0.01$ ,  $n_{\max} = 1262$ , **Figure 4, SI Table 1**), with higher carbohydrates, higher sugar, lower fat and lower protein for plant-based meals. The amount of protein, which was approximately one third lower in plant-based meals compared to animal-based meals (**Figure 4F**), had a small effect on post-meal satiety, i.e. that higher protein content led to higher satiety ( $b = -0.01$ ,  $t = -3.1$ ,  $p = 0.002$ ), which was not significantly different between meal categories (interaction effect,  $p < 0.89$ ). No further significant interaction effects of nutrients were found for the models on hunger and mood.

Analyses for fiber content as pre-registered could not be performed, due to missing information on fiber content in all cafeterias. We therefore explored differences in meal composition / food components qualitatively in frequency plots of meal components and quantitatively by running models on carbohydrate quality (i.e. whole-grain vs. white flour meals). Overall, description of plant-based meals showed higher frequency of vegetables and salads, as well as other food items with high amounts of fiber, like whole grain, lentils or sweet potatoes, compared to animal-based meals. Further, when comparing identical meal descriptions (most common meal was “spaghetti bolognese”) between white flour ( $n = 416$  meals (animal-based: 317, plant-based=99)) vs. whole-grain flour ( $n = 26$  meals (animal-based: 2, plant-based=24))), we found no significant differences between kcal and protein content (both  $p > 0.54$ ), and assumed higher fiber content for whole-grain meals. Accordingly, linear mixed models (LMMs) showed that hunger was lower ( $b = -0.30$ ,  $t = -1.7$ ,  $p < 0.2 \times 10^{-15}$ ) and mood was higher ( $b = 0.15$ ,  $t = 0.8$ ,  $p < 0.8 \times 10^{-7}$ ) independent of timepoint for spaghetti bolognese made of whole-grain flour compared to white flour. Post-meal ratings did not differ for hunger ( $b = -0.08$ ,  $t = -0.28$ ,  $p = 0.78$ ), mood was significantly increased after whole-grain meals ( $b = 0.41$ ,  $t = 1.98$ ,  $p < 0.05$ ) (**Figure 5**). Comparisons between meal category were not possible due to limited group size for carbohydrate quality per meal category.

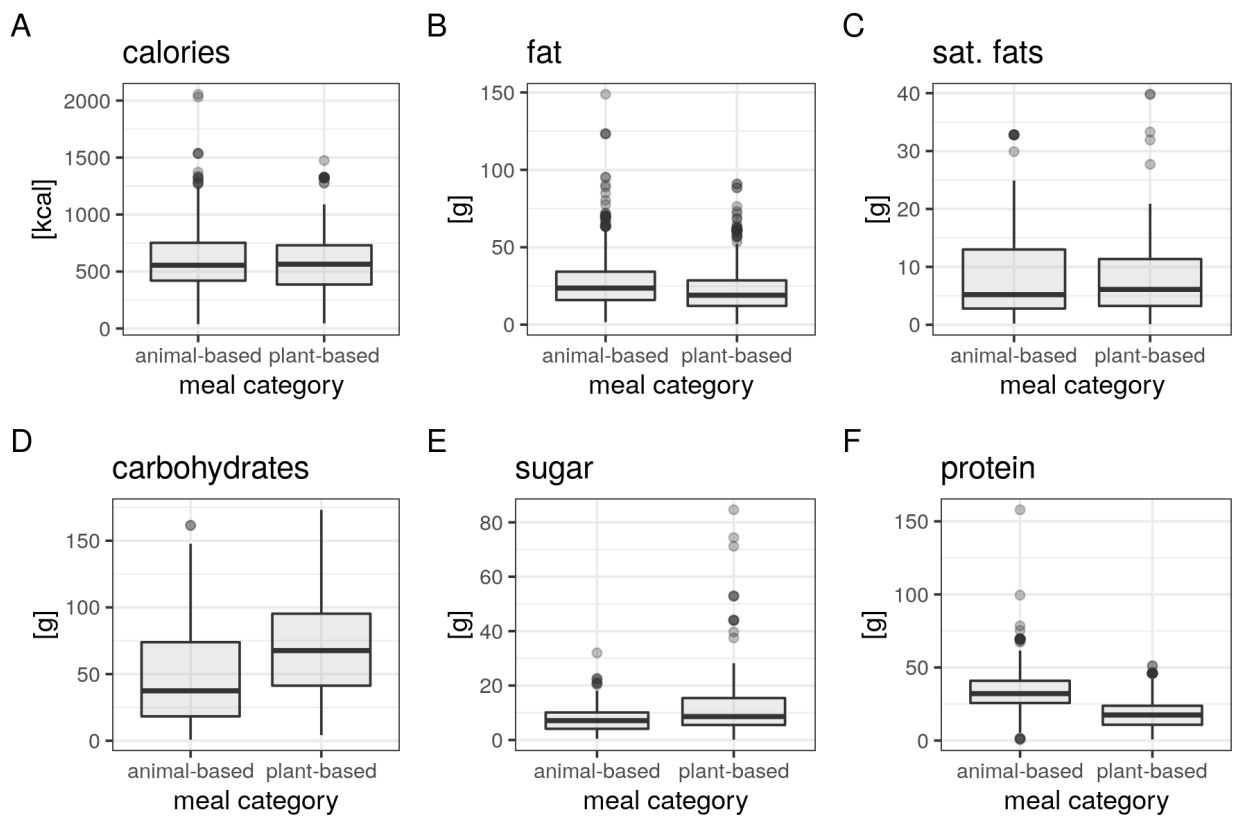

Figure 4: Nutrient composition between meal categories in a subsample of the app-study ( $n_{\max} = 1262$ , data from app study). Macronutrient information per portion size for A) calories in kcal B) fat in grams C) saturated fats in grams D) carbohydrates in grams E) sugar in grams and F) protein in grams. Median depicted as line, outliers (according to interquartile rule) as dots.

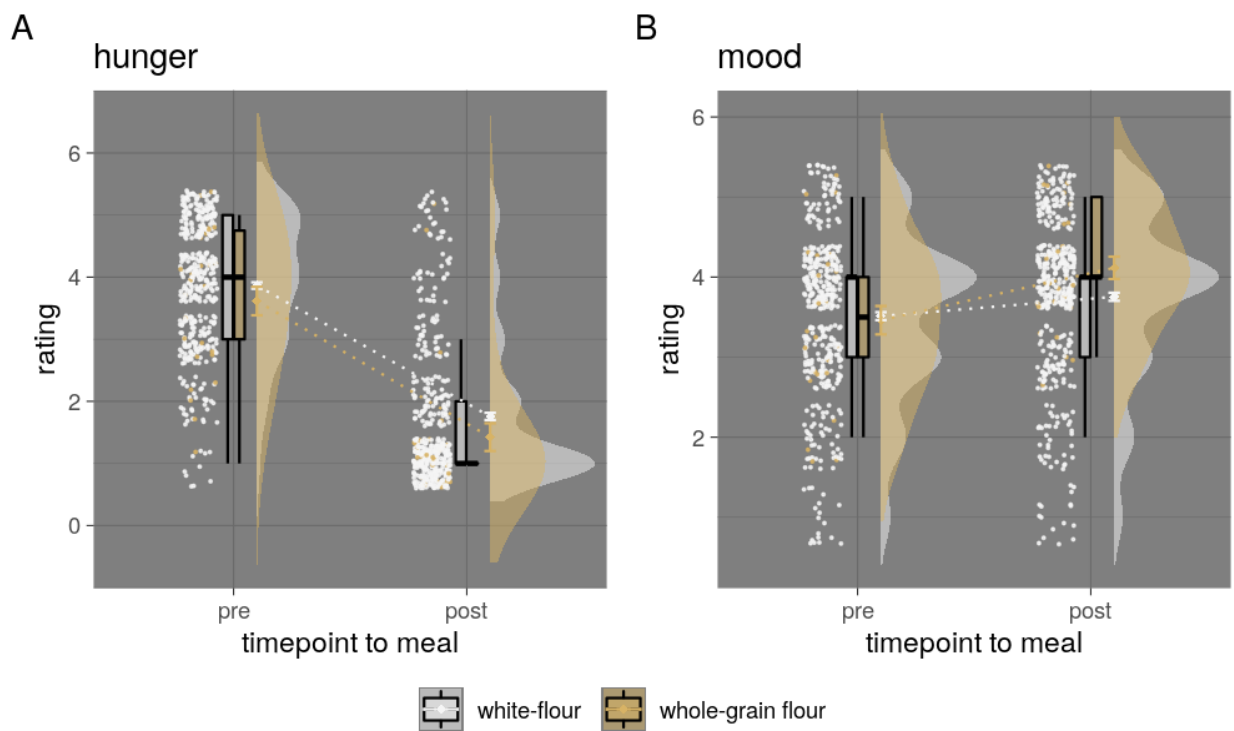

Figure 5: Mean ratings of pre- and post-meal for hunger and mood by white flour vs. whole-grain flour bolognese meals (app-study only ( $n = 442$ ) depicted in A) hunger B) mood. Median depicted as line, mean as dot, outliers (according to interquartile rule) as triangles.

## Effects of taste on hunger and mood independent of meal category

Post-meal taste ratings provided on a Likert scale from one to five stars were available in the app study only and showed significant differences between meal categories, with animal-based meals being rated higher in taste more frequently (mean  $\pm$  SD: animal-based:  $3.86 \pm 1.23$ ; plant-based:  $3.77 \pm 1.27$ , Kruskal-Wallis  $\chi^2(1) = 21.8$ ,  $p < .001$ , scale from one to five stars; zero stars for retracted rating, **Figure 6**).

According to LMMs, better taste was related to higher satiety and higher mood on average, with a somewhat linear relationship from lowest to highest taste category, in particular for post-meal mood ratings (**Figure 6, SI Table 2**). Note that only 4.9% of individuals reported lowest taste ratings, and 2.4% retracted the rating (corresponding to zero stars), whereas 35.2% reported maximal ratings across all meals. Overall, low taste ratings increased hunger and high taste ratings lowered hunger considerably (post-meal\*1 star:  $b = 0.6$ ,  $t = 6.4$ ; post-meal\*5 stars:  $b = -0.5$ ,  $t = -7.3$ ). Also, low taste ratings had a strong negative effect on post-meal mood (post-meal\*1 star:  $b = -1.3$ ,  $t = -19.8$ ), whereas high taste ratings moderately elevated post-meal mood (post-meal\*5 stars:  $b = 0.5$ ,  $t = 8.5$ ). This taste effect on hunger and mood was significantly different between animal-based meals compared to plant-based meals, showing a slightly stronger effect of taste on both hunger and mood after an animal-based meal (**Figure 6**: triple interaction between timepoint, meal category and taste: all betas  $> |0.01|$ , all  $p < 0.01$ ) (**SI Table 2**).

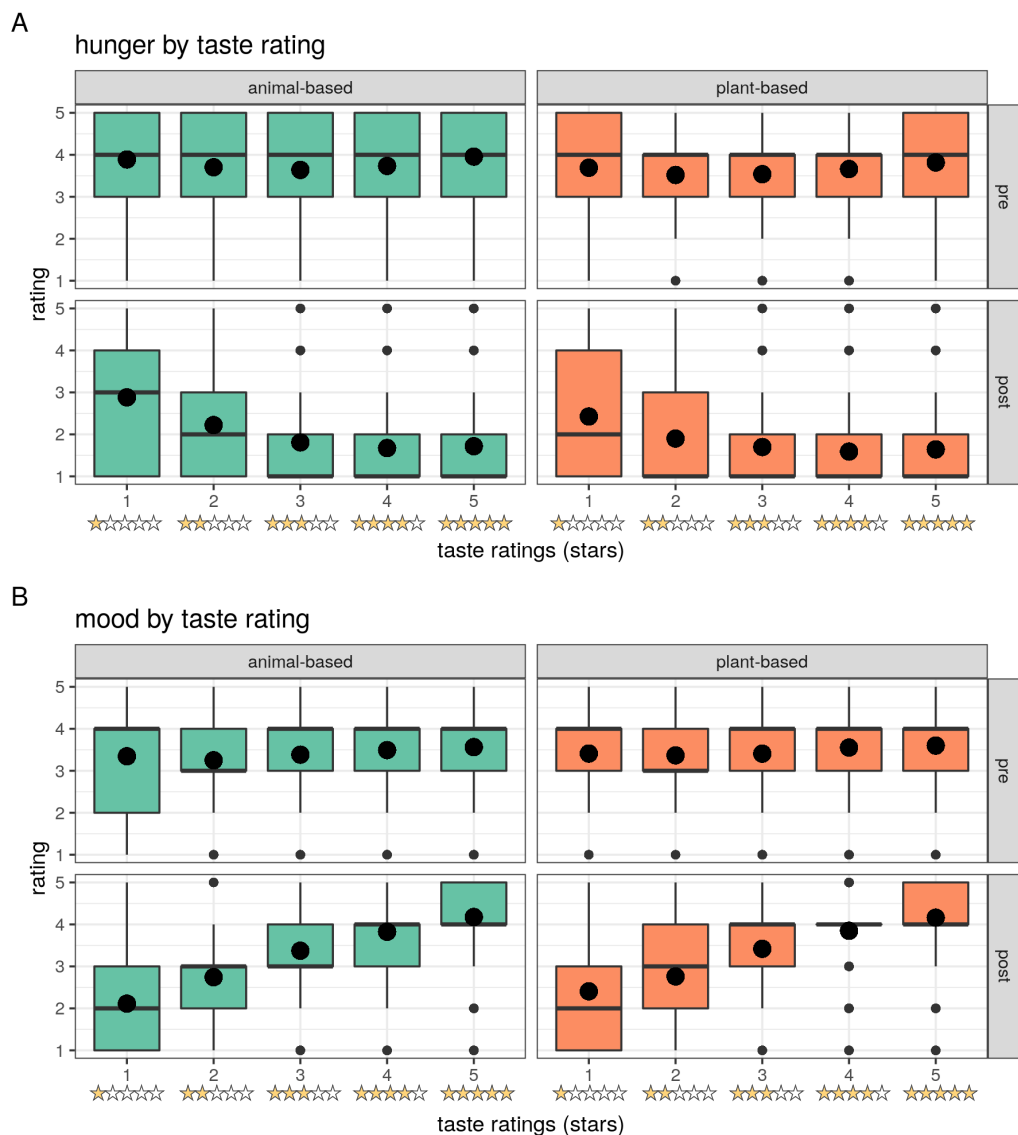

Figure 6: Effects of taste ratings on hunger and mood by star rating provided (app study only). A) Hunger ratings by taste rating from 1 to 5 stars B) Mood ratings by taste rating from 1 to 5 stars. Median depicted as line, mean as dot, outliers (according to interquartile rule) as small dots.

### Correlation of post-meal satiety, mood and stress

Changes in satiety pre- to post-meal correlated with changes in mood pre- to post-meal, i.e. lower meal-induced hunger was associated with higher meal-induced mood, significant for data from the app study (Spearman's correlations 95%CI p-value; app study:  $r = -0.19 [-0.21 -0.18]$   $p < .001$ ; sub-study free choice:  $r = -0.08 [-0.23 0.07]$   $p = 0.3$ ; sub-study randomized allocation:  $r = 0.13 [-0.10 0.35]$   $p = 0.27$ , **Figure 7, SI Figure 5**). There was no association between changes in hunger and stress levels (sub-study free choice:  $r = 0.15 [-0.004 0.288]$   $p = 0.056$ ; sub-study randomized allocation:  $r = -0.10 [-0.32 0.14]$   $p = 0.43$ ) in the two sub-studies. There was a significant correlation between lower mood and higher stress levels pre- to post-meal in both sub-studies (sub-study free choice:  $r = -0.34 [-0.46 -0.20]$   $p < 0.001$ ; sub-study randomized allocation:  $r = -0.39 [-0.57 -0.17]$   $p < 0.001$ , **SI Figure 5**).



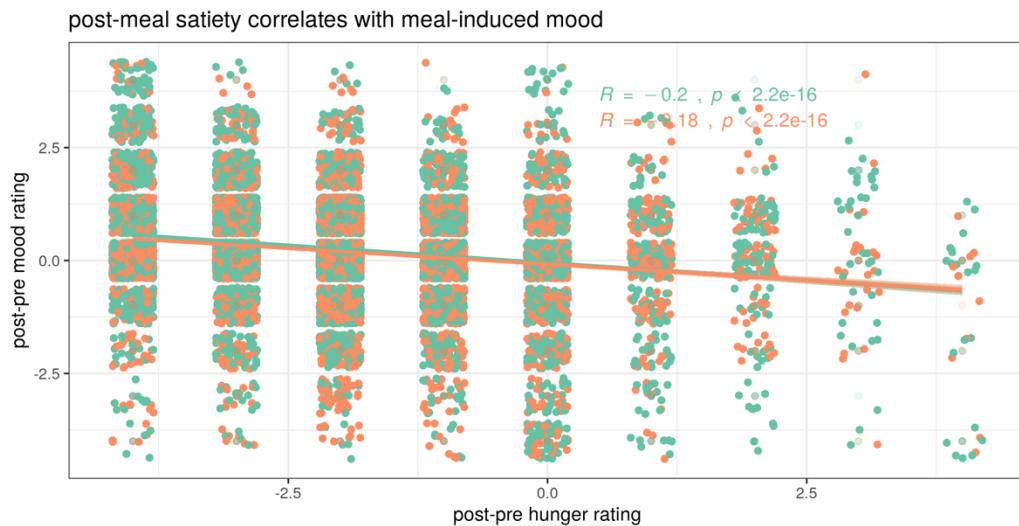

Figure 7: Correlation of post-pre changes between hunger and mood levels plotted by meal category (green: animal-based; orange: plant-based) (app study only). Spearman's correlation and 95% CI depicted.

### Confounding variables between meal categories: gender, social interaction, finishing a meal

Plant-based meals were more frequently chosen by female and diverse gender, eaten alone and less often finished compared to animal-based meals (**Table 1**). To investigate the potential confounding effects of these factors, we repeated the main models for satiety and mood including these factors in separate models.

Overall, hunger was significantly different for gender, showing lower hunger in female ( $b = -0.23$ ,  $t = -15.6$ ) and higher hunger in diverse ( $b = 0.21$ ,  $t = 4.0$ ) compared to male gender (model comparison  $p < 2.2 \times 10^{-16}$ , **Figure 8A, SI Table 3**). Mood in general was slightly lower in female ( $b = -0.01$ ,  $t = -0.9$ ) and drastically lower in diverse gender ( $b = -0.71$ ,  $t = -13.8$ ) (model comparison  $p < 2.2 \times 10^{-16}$ , **Figure 8B, SI Table 3**). When running gender-stratified LMMs (male  $n = 8291$ , female  $n = 7418$ , diverse  $n = 279$ ), post-meal hunger after plant-based compared to animal-based meals was similarly higher for male ( $b = 0.07$ ,  $t = 2.2$ ,  $p = 0.03$ ) and female ( $b = 0.09$ ,  $t = 3.0$ ,  $p = 0.003$ ) and not significantly different for diverse ( $b = -0.08$ ,  $t = -0.4$ ,  $p = 0.7$ ). Models for post-meal mood were significant for both male and female (all  $p < 0.005$ ), but not for diverse gender ( $p = 0.08$ ), with similarly lower mood ratings in both males and females (male:  $b = -0.07$ ,  $t = -2.8$ ; female:  $b = -0.1$ ,  $t = -4.1$ , diverse:  $b = 0.35$ ,  $t = 1.8$ ) after plant-based vs. animal-based meals. Note, that taste ratings were similar across all genders (**SI Figure 6**).

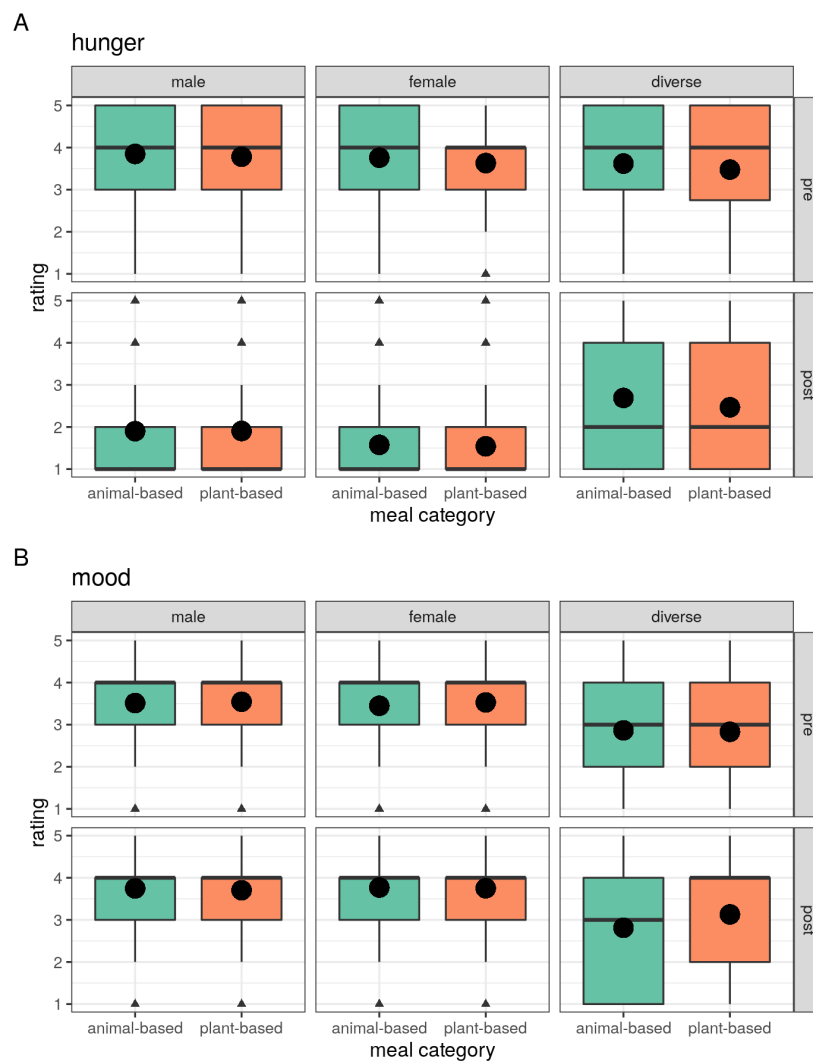

Figure 8: Effects of gender on hunger and mood (app study only,  $n_{\text{male}} = 8291$ ,  $n_{\text{female}} = 7418$ ,  $n_{\text{diverse}} = 279$ ). Median depicted as line, mean as dot, outliers (according to interquartile rule) as triangles.

Eating in company compared to eating alone was related to moderately higher hunger ( $b = 0.1$ ,  $t = 6.1$ ) and higher mood ( $b = 0.1$ ,  $t = 6.4$ ) (model comparison all  $p < 2.1 \times 10^{-10}$ ). Yet, social company during meal intake did not explain significant variance of post-meal ratings for hunger or mood by meal category (model comparison all  $p < 0.68$ ).

Finishing a meal was related to higher overall hunger ( $b = 0.1$ ,  $t = 5.4$ ) and higher mood ( $b = 0.4$ ,  $t = 20.2$ ) (model comparison all  $p < 7.0 \times 10^{-8}$ ). Moreover, finishing a meal also explained slightly higher post-meal hunger ratings ( $b = 0.05$ ,  $t = 0.8$ ) but also slightly higher mood ( $b = 0.08$ ,  $t = 1.6$ ) for plant-based compared to animal-based meals (model comparison all  $p < 2.2 \times 10^{-16}$ ).

Although not different across meal categories, coffee intake was assessed as a potential confounder on satiety and mood ratings in sub-studies two and three (data was in subgroups only and not available for the app study). Coffee intake did not explain a significant variance on hunger or contentment, but higher coffee consumption was related to higher stress levels (250-500ml:  $b = -0.17$ ,  $t = -0.3$ ; 500-1000ml:  $b = 6.2$ ,  $t = 3.6$ ; note the limited sample size of  $n = 32$ ).

### Effects of impulsivity in meal choice

In the app study, choosing a plant-based meal was 10% more often reported to be a planned decision, compared to that of an animal-based meal choice ( $X^2 = 174$ ,  $p < 2.2 \times 10^{-10}$ , planned

plant-based = 72%, planned animal-based = 62%, **Table 1**). Moreover, we observed an interaction effect between the feeling of planned decision-making at meal choice on higher hunger ( $b = 0.04$ ,  $t = 2.8$ ,  $p = 0.006$ ) and higher mood ( $b = 0.13$ ,  $t = 8.9$ ,  $p < 2.2 \times 10^{-16}$ ) after the meal. The interaction effect of a planned decision on higher hunger at post-meal was significantly lower for plant-based meal choices (decision\*post-meal\*plant-based:  $b = -0.04$ ,  $t = -0.9$ ,  $p < 2 \times 10^{-5}$ ), as well as less pronounced for lower mood (decision\*post-meal\*plant-based:  $b = -0.02$ ,  $t = -0.4$ ,  $p < 5 \times 10^{-6}$ ) compared to animal-based meals.

## Contentment when randomized to meal

In sub-study three meal choice was randomly allocated and therefore not a confounding variable. Meal category was randomly assigned after filling out pre-questionnaires right before the planned meal. Contentment about randomization before the meal was not significantly different for animal-based versus vegetarian or vegan meals ( $n = 71$ ,  $X^2 = 9.6$ ,  $df = 9$ ,  $p = .27$ , **Figure 9A**). Overall post-meal contentment after randomization was met more frequently for the animal-based condition ( $n = 71$ ,  $X^2 = 6.1$ ,  $df = 2$ ,  $p = .04866$ , **Figure 9B**). Those who reported to be content with the randomization, did not differ between reasons for it (“chosen anyway”, “preferred something else, but I liked it”, “generally no preference”,  $X^2 = 0.03$ ,  $df = 2$ ,  $p = .98$ , **Figure 9C**), compared to those who reported discontent ( $n = 8$  “preferred vegan”,  $n = 9$  “preferred meat-based”,  $X^2 = 13.2$ ,  $df = 1$ ,  $p < 0.001$ , **Figure 9D**). However, randomization contentment pre- and post-meal as a main factor did not explain a significant amount of variance with regard to satiety or mood (all betas  $< 0.28$ , model comparisons all  $p > 0.52$ ).

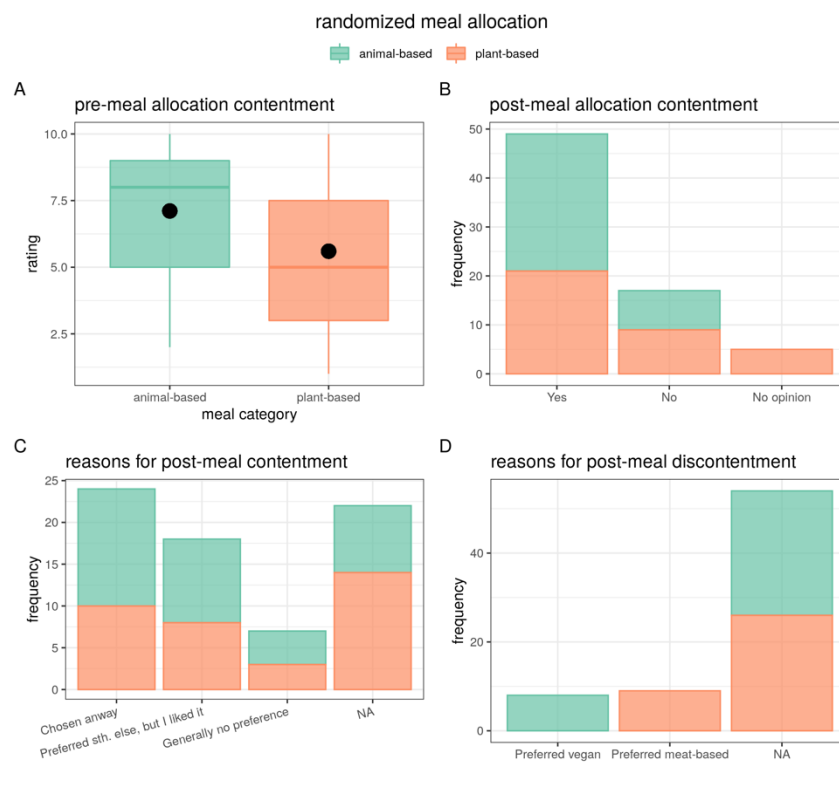

Figure 9: Post-randomization contentment and post-meal contentment and reasons for the latter (sub-study 2,  $n = 71$ ). A) Pre-meal allocation contentment rating (1-10 Likert scale) by meal category. Mean depicted as dot. B) Post-meal allocation contentment in categorical answers depicted as frequency by meal category. C) Reasons for post-meal contentment in categorical answers depicted as frequency by meal category. D) Reasons for post-meal discontentment in categorical answers depicted as frequency by meal category.

Further, we tested the effect of assigned meal and subsequent liking as preregistered by defining three categories, namely voluntary (n = 174) vs. non-voluntary-liked (n = 49) vs. non-voluntary-disliked (n = 17) of meal category across both sub-studies two and three. Mode of choice did not explain any significant variance on hunger, mood or stress levels across time on meal choice (preregistered model: all  $p > 0.14$ ). When looking at interaction of timepoint and mode of choice and meal category, post-meal hunger was higher for non-voluntary-liked ( $b = 1.4$ ,  $t = 1.8$ ) and lower for non-voluntary-disliked ( $b = -1.6$ ,  $t = -1.4$ ) compared to voluntary choice for plant-based meals (model comparison  $p < 0.004$ ). Post-meal effects of mode of choice for plant-based meals showed higher mood for non-voluntary-liked ( $b = 0.34$ ,  $t = 0.5$ ) compared to non-voluntary disliked ( $b = -0.7$ ,  $t = -0.7$ ) (model comparison  $p = 0.028$ ). There was no interaction effect of mode of choice on stress levels post-meal for plant-based meals ( $p > 0.9$ ).

## Dietary habits – subgroup analysis

To account for potential effects of dietary adherence, we repeated the analysis in subgroups for omnivorous (n = 11,600), vegetarian (n = 3,456) and vegan (n = 911) dieters.

The analysis in predominantly omnivorous dieters only presented the same effects as the whole group, i.e. showing slightly lower mood after a plant-based meal compared to animal-based meals, and also significantly higher post-meal hunger ratings for those choosing plant-based meals (**SI Table 4**). Influences of taste remained significant for post-meal mood, yet the influence of taste ratings on hunger by meal category was no longer significant.

For predominantly vegetarian dieters only, results again resembled the main analysis, with no effect on post-meal hunger, yet lowered mood for those choosing a plant-based meal (note the unequal group size of animal-based meal n = 577, plant-based meal n = 2,880, **SI Table 4**). When accounting for taste ratings, post-meal hunger was lower overall for meals rated with five stars, yet hunger was higher when this was a plant-based meal. Mood ratings showed a similar paradoxical effect when adjusted for taste, namely improved mood for liked meals, yet when those were plant-based, mood was lowered.

For predominantly vegan dieters only, hunger was lower and mood was higher after choosing a plant-based meal (note the unequal group size of animal-based meal n = 117, plant-based meal n = 795 out of 911 vegan dieters, **SI Table 4**). When accounting for taste, highly liked meals reduced hunger, yet there was no difference in hunger ratings between meal categories. Mood adjusted for taste, showed improved mood for highly liked meals, which was also shown for plant-based meals compared to animal-based ones.

Taste ratings by meal category differed for dietary adherence groups, namely that animal-based meals were rated higher compared to plant-based meals by omnivores (animal-based:  $3.87 \pm 1.2$ , plant-based:  $3.70 \pm 1.3$ ) and similarly, but less pronounced for vegetarians (animal-based:  $3.88 \pm 1.2$ , plant-based:  $3.81 \pm 1.7$ ). The opposite was true for vegans (animal-based:  $3.34 \pm 1.7$ , plant-based:  $3.96 \pm 1.2$ ) (**SI Figure 7**).

## Time stamps

Time difference between pre- and post-meal hunger entries in the app study varied quite drastically and was very small on average (mean  $\pm$  SD:  $54 \pm 139$  min, median: 0.5 min). To restrict entries to a reasonable timeframe around actual food intake, we additionally restricted the analyses as preregistered to entries that had more than 5 min and up to 3 h time lag between pre- and post-meal (hunger) entries (liberal timeframe) or more than 20 min and up to 1.5 h time

lag between pre- and post-meal (hunger) entries (conservative timeframe). This led to a profound drop in sample size (liberal  $n = 3725$ , conservative  $n = 1878$ ).

Results remained largely unchanged for the liberal timeframe from 5 min to 3 h difference between pre- and post-meal entries, namely significant main effects of post-meal timepoint with lower hunger and higher mood. For interaction effects of post-meal by meal category, no significant effects were found for hunger or mood, yet nominal differences were similar to the main analysis for hunger (higher post-meal hunger for plant-based meals), but not for mood (higher post-meal mood for plant-based meals). For the more conservative timeframe from 20 min up to 1.5 h post-meal, main effects for lower hunger and higher mood for post-meal timepoint were sustained. Yet, interaction effects of timepoint by meal category showed significant higher post-meal hunger for those choosing a plant-based meal ( $b = 0.14$ ,  $t = 2.3$ ,  $p = 0.024$ ), while the main analysis showed non-significant results in the same direction of the estimate, and no significant effect on post-meal mood, yet also similar nominal differences with lower mood after plant-based meals ( $p > 0.14$ ). Note that the reduced sample size when curating for timeframe indicate that the remaining entries had quite a high variety of time lag related to meal intake. Compliance with study design specific timeframes was manually curated in sub-studies 2 and 3 and have already been considered in all of the above analyses.

## Discussion

In this series of large-scale online surveys of >16,300 individual data entries and three independent data collections in German cafeterias, we provide evidence based on pre-registered analyses that the category of a single meal (i.e. whether plant-based or containing meat/fish) exerts no effect on post-prandial hunger of the individual, and a certain, yet not considerably large influence on mood. More specifically, we found that while participants report higher satiety and improved mood after a meal in general, mood was slightly higher in individuals choosing a plant-based meal before the meal. Against our hypotheses, there was no significant interaction effect of meal category and timepoint for hunger, but for mood, however contrary to our hypothesis, with smaller post-meal increases in mood for individuals choosing a plant-based meal compared to an animal-based meal. The more deeply phenotyped sub-studies 2 and 3, profoundly smaller in sample size, indicated similar nominal differences between meal categories, yet did not support that those differences should be regarded statistically significant in the main pre-registered analyses.

### *Effects of nutrient composition on hunger*

We hypothesized that plant-based meals would increase satiety due to a higher amount of fiber in those meals, which was however not supported by the data. This might imply that fiber content has only negligible effects on satiety, and/or that fiber was not different between meal categories on average. In addition, while we could not evaluate actual fiber content due to missing information, we found that plant-based meals had higher carbohydrate, higher sugar, lower fat and lower protein content compared to animal-based meals in a subset of available datapoints. This is insightful given that plant-based food consists of more carbohydrates, while meat and fish have more protein. Now, in a secondary analysis, we found that protein content contributed to satiety after the meal, arguing that plant-based vs. animal-based meals could relate to lower satiety due to the difference in protein content between meal categories, thereby concealing (potential) effects of higher fiber content on satiety. Indeed, cross-over within-subject studies reported that post-meal satiation did not differ dependent on protein source when adjusted for

fiber content [26] or in case of protein preload previous to ad libitum food intake [27]. Moreover, cafeteria meals overall might contain more processed and less balanced nutrient compositions compared to the average plant-based meal investigated in previous literature. However, note that highly processed vegan meals, still four times higher in fiber, were also found to induce higher satiation in a within-subject randomized clinical trial compared to energy-matched meat-containing processed meals [28]. Another explanation for the lack of strong differences between meal categories might be that individuals choosing animal-based meals added fiber-rich side dishes such as broccoli, thereby “bypassing” the hypothesized disadvantageous effect of animal-based meals on post-meal hunger ratings. Notably, participants choosing plant-based meals reported less hunger overall compared to those making animal-based choices, which might have led to a certain ceiling effect on the 5-point Likert scale in the app study so that satiety could not be achieved in similar magnitude between meal categories. Future studies could avoid this phenomenon through implementing a more controlled environment with e.g. a 12 h-fasting condition before the meal and thus comparably higher hunger before the meal. However, our large-scale analysis offers the advantage to study effects of a single meal in a real-world context. Thus, while participants choosing a plant-based meal in cafeterias were not more satiated by their current (fiber-rich) meal, they appeared less hungry on average, which might relate to more long-term effects of differences in dietary habits (see below). However, these considerations remain highly speculative given the timeframe of our study design.

#### *Effects of meal category on mood*

Against our hypothesis, that plant-based meals would increase post-meal mood more strongly than animal-based meals, we found the opposite effect. Here, we might have neglected certain normative expectations towards the meal in a society that on average consumes meat and fish on a daily basis [29], in particular potential reservations against plant-based meals related to be lacking in something or not being hearty enough, which is also in line with lower taste ratings of plant-based meals. These expectations might have influenced post-meal mood ratings. Surprisingly, individuals choosing plant-based meals showed higher mood ratings before the meal, which is in contrast to meta-analytical evidence for higher depressive symptoms in long-term vegetarian/vegan dieters [18], but in line with improved mood related to pre-/probiotic diets [19]. Note, that the short timeframe of a single-meal on mood ratings compared to epidemiological evidence of long-term dietary habits could explain the deviating results, and that the effect size of the present study must be considered small. Further, fiber-induced improvements on mood could be particularly effective for vulnerable individuals only, as shown for patients suffering from inflammatory bowel syndrome or major depressive disorder [20, 30]. While we assume that the majority of individuals was healthy in our studies assessing detailed medical history was out of scope in the presented online studies. Besides meal category, taste ratings showed a substantial impact on post-meal mood ratings, with higher mood for more tasteful meals. Importantly, as plant-based meals were ranked less tasty overall, especially by omnivores and vegetarians, cafeterias should aim to improve tastiness of plant-based meals in order to ensure equal enjoyment and satisfaction despite meal category. When limiting the analysis to identical meal descriptions such as spaghetti bolognese, note that those providing higher fiber content through whole-grain pasta induced higher satiety and higher mood compared to conventional pasta.

#### *Acute vs. long-term effects of plant-based meals*

The present acute effects are somewhat in contrast to epidemiological evidence showing higher satiety and both either higher or lower depressive symptom scores in vegan/vegetarian dieters [18, 20, 31], we did not observe higher satiety and mood at post-meal for plant-based meals. In dietary adherence subgroup comparisons we found that lower satiety and lower mood at post-

meal for plant-based choices occurred in the omnivorous and vegetarian group only, yet effects were inverse for the vegan subgroup. This could be due to the limited timeframe of the intervention only looking at acute postprandial changes in satiety and mood after a single meal in contrast to long-term dietary habits in epidemiological studies, that might be better suited to capture changes in gut-brain signaling and host physiology in response to higher fiber intake. A systematic review further highlights that although fiber indeed leads to satiety-inducing effects, the expected timeframe of action is rather 3 to 15 hours post-ingestion [14]. Indeed, it has been shown that diet can rapidly change host gut microbiome, yet these changes only occur within 24 to 72 hours after drastic dietary changes [32]. Also, we found that individuals choosing a plant-based meal showed lower overall hunger and higher mood before the meal compared to animal-based meals. In sum, these findings underline that contrary to our hypothesis, not the acute meal choice, but rather habitual dietary patterns and other characteristics such as dietary adherence may determine the effects of a meal.

#### *Importance of perceived taste, meat tradition and deliberate decision-making*

Considering biopsychological mechanisms, taste ratings, which were overall slightly higher for animal-based meals, had a strong effect on satiety and mood, highlighting that taste shapes satiety and mood acutely after a plant-based meal and even more so after an animal-based meal. It has been shown that omnivorous individuals expect plant-based alternatives to be less tasty compared to a meat burger [33]. While impulsive decisions were more frequently made for animal-based meals, such a spontaneous decision further augmented the effect of taste on satiety and mood as shown by our data, whereas in plant-based meal eaters planned decisions had less effect on hunger and mood. Taste has also been shown to influence post-meal satiety [37, 38], with greater satiation for tasteful meals independent of nutrient composition. Thus, while macronutrients dense in calories such as fat are often described as flavor carriers, and shown to elicit even supra-additive value if paired with carbohydrates on a neuronal level [39], low-calorie meals such as salad bowls may induce similarly strong satiety like mac'n'cheese if perceived similarly tasty. However, interoceptive signaling via emotion regulatory processes might determine the properties of any given food further, which may partly explain why some (often high-caloric) foods, such as pizza or burgers, are considered emotionally comforting and rewarding [40]. Notably, besides the subjective component of taste, there could have been an objective difference in taste by meal category. Meat- and fish-based meals might have been higher in quality due to a longer tradition and knowledge of meal preparation for such [34] compared to rather recent developments of vegan and vegetarian cuisine in Germany, that is barely taught in conventional cooking trainings. Moreover, societally meat dishes are viewed as more valuable and might therefore have a higher intrinsic value for omnivorous eaters in meat-heavy culinary traditions [35], one of the many reasons why despite wanting to eat more sustainably only some groups succeed in avoiding meat completely, so called flexitarians [36]. Considering the university setting, choosing meat-based meals could also be motivated by maximizing food reward linked to expected taste for meaty meals. Although we did not evaluate meal price in this study, oftentimes in cafeterias plant-based meals subsidize animal-based meals leading to equal or even lower prices for meaty meals. Yet, in our analysis socioeconomic status was not a significant predictor of meal choice. Indeed, we also found that hunger and mood changes are not completely independent, but that higher meal-induced satiety correlated with stronger mood improvements.

#### *Effects of gender, finishing a meal and social interaction*

Moreover, gender and whether the individual finished their meal or not could explain a high share of hunger and mood rating differences, whereas social interaction during meal time was not explanatory of post-meal hunger and mood ratings. Female and diverse gender showed

differential effects on hunger and mood ratings related to general meal intake, yet for post-meal ratings for plant-based meals females and males showed similar effects for lowered mood, yet this effect was not present in diverse gender (however note the small sample size for diverse in comparison). Indeed psychological mechanisms of food intake differ by gender, i.e. females score higher on unhealthy eating traits [42], show higher prevalence of eating disorders, body and shape concerns [43], are more frequently and more strictly on plant-based diets [44], follow restrictive diets and weight loss strategies more often, as well as having an increased awareness for health [45, 46]. Only few studies considered gender diverse individuals, yet some evidence supports a heightened risk for eating disorders in sexual and gender diverse students [47]. In sum, these findings underline the importance of designing gender-sensitive public health strategies with regard to diet, e.g. tailoring differences in health awareness, mood and emotion regulation and openness to plant-based meals to the individual.

#### *Manipulating mode of choice*

Even though contentment about meal category at time of being informed about randomization was not different between meal groups, post-meal contentment about the allocation differed, with more participants reporting that they would have preferred an animal-based meal when they were dissatisfied with the allocation. Yet, hunger and mood ratings remained unaffected, highlighting that individual preference for category per se did not affect satiety and mood that much. However, when meal category was randomly allocated hunger and mood seemed to be higher when the meal was liked, and both were lower when disliked, showing opposite effects in this study setting compared to the free choice setting. This indicates that a forced choice might enhance the importance of the subjective liking of a certain meal category on hunger and mood, a notion that can inform policy-making when aiming to increase plant-based dieting.

#### *Dietary adherence might explain potential differences regarding internal beliefs and mindset*

Subgroup analysis suggests that in particular self-reported predominantly omnivorous and vegetarian dieters are driving the observed interaction effects of meal category on mood but also on hunger in the subsample analysis, whereas effects in vegan dieters were reversed. This underlines the potential confounding of (presumed) expectations towards plant-based meals when being able to deliberately choose between animal-based and plant-based meals. Possibly, food decision-making in non-vegan dieters might not rely on self-set dietary goals as much and reservations about plant-based meals could be further fueled by an unknown food composition or ingredients or unfamiliar taste. For vegan dieters meal choice is anyhow limited and food decision-making might rely on more long-term goals including health, ethical, and climate arguments [48], all of which are not immediately to be processed at time of meal choice. Indeed, literature shows that vegan and vegetarian diets are associated with orthorexia nervosa, an eating disorder with an obsession for healthy eating [49]. Unexpectedly, in sub-study two with omnivorous dieters only we also found higher scores for cognitive restraint and hunger in those choosing plant-based meals. Overall well-being or emotional constitution were not assessed in the app study though. In sum, dietary adherence factors could have masked or distorted potential effects of meal category on hunger and mood, indicating that other factors than single meal choice exert again considerably stronger influence.

#### *Limitations and strengths*

Online studies are gaining momentum, in particular hosted on crowdsourcing platforms, and have great potential in terms of collecting big datasets from the real-world [50]. Yet, several challenges in our study design should be noted as limitations:

Firstly, all results were based on self-reported subjective ratings and we expected compliance by the participants with the study set-up, yet fake ratings could not be excluded. The virtual setting



and a resulting lower commitment to complete the study might also explain relatively large amounts of missing values for some of the confounding variables. Moreover, nutritional values were only available in a subset of data, further limiting power in the respective analyses. Note, that information on fiber content was not available, which might be due to a general lack of awareness and literacy on dietary fiber (“knowledge fiber gap”, compare [51]), to which end we advocate to extend nutrient labeling on food packaging, in menus, in nutrition apps and nutritional experimental databases etc. by dietary fiber. Further, online datasets require careful data curation strategies, including exclusion of duplicates, defining outliers, fake and non-compliant entries. Notably, when restricting our analysis to a pre-defined still liberal or conservative timeframe around meal intake when entries needed to have been made, sample sizes were drastically reduced and smaller differences did not reach significance anymore, somewhat limiting our conclusions. To overcome this issue, future app studies might implement a technical solution that reminds participants to stick with certain time frames. Also when cooperating with already existing institutions and technological environments, the research team has to adapt to limitations or peculiarities of the dataset such as missing information or unusable data structures and should thus a priori consider how this would affect statistical analyses. Secondly, Likert scales were conceptualized and adapted to the virtual setting, making the use of established research tools difficult, but instead calling for new solutions and ideas for developing suitable, reliable research tools (such as emoji-based Likert scales). Thirdly, meal categorization into animal-based vs. plant-based was based on provided information by the cafeteria meal plans on allergens and meal description using keywords for classification. Manual categorization was only done in sub-studies 2 and 3. Therefore, only unambiguously classified meals could be included, leading to a reduction in sample size. Fourthly, we did not assess important psychological factors that might have influenced meal choice, in particular, health awareness, dieting goals, sport habits and ethical concerns.

Besides the listed limitations, the presented studies have several strengths:

Firstly, the real-life experimental setting of all three studies is a major strength aiming to enhance application and conclusions to the living population without being in a highly controlled research environment. Secondly, especially the app study consists of a huge sample and has been collected nation-wide in Germany and partly in Austria increasing generalizability of the results independent of cafeteria location or regional differences. Also sub-studies 2 and 3, although lower in sample size, are thoroughly phenotyped datasets with a multitude of potential confounders assessed. Thirdly, all studies are longitudinal and contain pre- and post-measures that allow linear mixed effects modeling correcting for the individual participant and the respective cafeteria location. Fourthly, addressing the complexity of real-life settings, various confounding factors were assessed and included in exploratory analyses to enhance the understanding of multimodal influences on meal decision-making and subsequent hunger, mood and stress ratings. Lastly, all three datasets have been carefully curated and sanity checks have been performed to ensure reliability of virtually collected ratings.

## Conclusion & Outlook

In summary, this series of large-scale surveys showed that overall effects of single plant-based meals compared to animal-based meals on satiety and mood are rather small compared to main effects of timepoint, underlining that meal category only has a minor impact. This notion alleviates some of the reservations against plant-based meals potentially not being satisfying enough or not leading to fullness, in modern societies [52]. Protein content and taste of meals were shown to contribute to satiety and mood. Thus, they should be increased in university cafeterias, in particular for plant-based meals, in order to enhance satisfaction and lastly also acceptability and prevalence of those meals that are regarded climate-friendly. Increasing plant-based choices

remains an important societal task with the aim to improve not only individual but also planetary health [53]. Moreover, promoting plant-based offers and increasing the proportion of plant-derived ingredients through science communication and the above discussed mechanisms might help to counter the rising obesity epidemic, particularly by replacing Western(-ized) diets. It should be noted that meals containing more plant-derived components are not necessarily healthier, as fast and ultra-processed foods, such as in meat or dairy substitutes that are becoming more prevalent, oftentimes have similar or worse nutrient composition.

Overall, animal-based vs. plant-based meal category has only minor influence on post-meal satiety and mood in university cafeterias compared to other demographic and external factors influencing meal choice. Future longitudinal studies, for example using smartphone-integrated real-world big data sampling are warranted to further understand the acute and long-term determinants of healthy food choices, possibly also assessing internal beliefs related to food decision-making.

## Materials and methods

### Recruitment

The Ethics Committee of the Medical Faculty of the University of Leipzig approved the study protocol and all participants provided written informed consent. The study was divided into three sub-studies and pre-registered at <https://osf.io/a7yts> (28 Nov 2019).

### Study design

For the first sub-study, all users of the smartphone app iMensa and Mensaplan (provided in Germany, Austria, Switzerland by AIMPULSE Intelligent Systems GmbH, Bremen, Germany) were invited to take part in a brief survey consisting of 12 questions. The app has been originally developed to provide meal plan information and collect meal ratings of student cafeterias (mostly run by the local “Studierendenwerk”) with approximately 300,000 users and about 5,000 ratings per week. Users were asked to report hunger and happiness before and after consuming a meal on a 5-point Likert scale each, accompanied by the originally app-provided rating of the respective meal on a 5-star scale. For the additional study-specific questions, emoji-based 5-point scales (**Figure 1**) were used to increase user-friendliness and to blend into the technological interface, selected based on maximal ratings on comprehension of the respective measure of interest in a pilot study (hunger: n = 29, 45% approval for emoji “plate”; mood: n = 30, 47% approval for emoji “smileys”). In addition, we asked for meal decision (spontaneous or planned), gender (female, male, diverse), usual predominant dietary habits (omnivorous, vegetarian, vegan) (“*Which dietary pattern do you adhere to predominantly?*”), amount of liquid intake in the last 2 hours (< 0.5L, < 1L, > 1L), whether they ate alone or in company, whether they finished their meal or not, frequent smartphone use during the meal (yes or no), and sleep quality of the last night (good, normal, bad). All data was provided with anonymous user identifiers by the app provider, along with exact date and time stamps of each question. The specifics to the app study (compared to sub-studies 2+3) were 1) both omnivorous and vegetarians/vegans took part in the study, no non-voluntary meal choice has been performed, 2) mood was asked with “how happy are you today ...”?, 3) the study did not assess stress levels and 4) meal categories were specified based on the available information provided by the cafeterias.

In the second and third sub-studies, all visitors of the student cafeterias in Leipzig, Berlin, Halle and Jena who planned to have lunch on-site, were over 18 years old and who had access to a LimeSurvey [www.survey3.gwdg.de](http://www.survey3.gwdg.de) via a mobile device could take part in the study. Before eating a meal, a baseline survey served as a screening tool to exclude visitors reporting known food allergies, food intolerances, eating disorders, neurological and/or psychiatric disorders, and other diseases that may have an effect on diet and mood like depression, schizophrenia, multiple sclerosis or Crohn's disease. Also, vegetarians and vegans were excluded for better comparability of meal categories among omnivorous subjects and to enable random allocation to meals for the third sub-study. Participants were free to choose the day of the study.

In the next pre-meal survey, participants were asked to rate satiety, happiness and contentment on a 10-point Likert scale (**Figure 1**, before either freely choosing a meal (sub-study 2) or being randomly assigned to eat a animal-based or a plant-based (vegetarian or vegan) meal (sub-study 3). After finishing the meal, participants were instructed to again report satiety, happiness and contentment on the same 10-point Likert scale. Moreover, age, sex, height (in 5 cm categories) and weight, as well as net monthly income (<500€/500-1000€/1000-1500€/1500-2000€/2000-2500€/>2500€) were assessed. In addition, a) estimated portion size, b) whether the meal was fully eaten up or not (yes/no), (c) whether side dishes or desserts have been chosen, (d) a questionnaire on eating habits (Food Frequency Questionnaire (FFQ), DEGS-1 [54]), e) a personality inventory (NEO-FFI) [55] and f) a questionnaire on eating habits (TFEQ) [42]. In addition, the survey asked about social contact during lunch (Did you have lunch alone or with others? Have you been looking at your mobile longer? Did you sit alone?). A debriefing about the study and its goals was provided after submission of the post-lunch survey. Optionally, participants could upload pre-lunch and post-lunch photos of their meals to monitor meal choice and compliance. In the randomized condition, the post-survey also asked whether participants were satisfied with the randomized condition, or if not, which meal choice they would have preferred.

Participants of sub-study 1 were not remunerated due to a very brief study completion time. Sub-studies 2+3 were remunerated with 9 € for participation, with an optional extra 2 € per questionnaire (TFEQ, FFQ, NEO-FFI). All data was collected from Jan 2019 until Feb 2020.

## Meal categorization

For analysis meal categorization was done by study personnel based on provided meal category (vegetarian, vegan, meat or fish) and more specific meal description as given in the menu and by information on allergens (keywords: *animal-based*: poultry, pork, beef, lamb, meat, fish, scampi, seafood, deer, piglet, duck, goose, salami, ham, wiener; *plant-based*: vegan, vegetarian, meat-free, tofu, soy). Categorization was done manually and in case of ambiguity based on consensus amongst study personnel. All remaining ambiguous meals were assigned missing value (e.g. in case meal description included both animal-based and plant-based keywords, e.g. "Tofuwurst oder Currywurst", "...also available in vegan", "Salatbuffet je 100g Auswahl an frischen Salaten, Gemüse-, Fisch-, Geflügel-, Schweine- und Rindfleisch- und vegetarischen und veganen Gerichten").

## Missing data and data selection/exclusion

All data was screened for plausibility, consistency and distribution and curated as appropriate. This included assigning meal category based on available information (meal description, information on allergens, meal photo). In sub-study 3, non-compliance with the assigned meal

category led to exclusion. Implausible datapoints were treated as missing. Missing data was treated as missings (linear mixed models), except for meal category, which led to exclusion of the datapoint in all analyses.

Data entry plausibility was monitored with time stamp information and, if available, based on the creation dates of the uploaded meal photos. In sensitivity analyses, data was excluded according to the following criteria: post-meal entries appeared to be made prior than pre-meal entries; data entry outside of liberal time frame for more than 5 min and more less 3 h time lag between pre- and post-meal (hunger) entries (pre- and post-meal entries outside of 7:45 am and 10:30 pm (cafeteria opening hours (10:45 am to 7:30 pm) + 3 h data entry time frame)); as well as data entry outside of a conservative time frame more than 20 min and less than 1.5 h time lag between pre- and post-meal (hunger) entries; (pre- and post-meal entries outside of 9:15 am and 9 pm (cafeteria opening hours + 1.5 h data entry time frame)) (note: we corrected timings indicated in the pre-registration). In sub-studies 2 and 3 only, duplicate records of the same participant were checked for consistency and curated accordingly so that each participant would only be counted once.

For detailed information on data curation and power calculations, see **SI**.

## Data analysis

As pre-registered (<https://osf.io/a7yts>), statistical analyses comprised linear mixed model comparisons using `lmer()` in R. We tested the following hypotheses regarding interaction effects:

### Primary analysis

(1) A plant-based (i.e., vegan, vegetarian) meal will lead to better mood, higher satiety and less stress compared to an animal-based meal.

$R1 = \text{lmer}(\text{mood} \sim \text{timepoint} + \text{meal} + \text{timepoint}:\text{meal} + (1|\text{subject}) + (1|\text{cafeteria}))$

Null model =  $\text{lmer}(\text{mood} \sim \text{timepoint} + \text{meal} + (1|\text{subject}) + (1|\text{cafeteria}))$

Note: “meal” was defined as vegan or vegetarian (0) vs. animal-based (1).

Two more analyses were performed with satiety and stress as dependent variables.

Additionally, we performed simpler models to test for main effects of meal category.

*Transformations.* Normal distribution of the raw values and residuals was assessed by evaluating visually the uniformity of the maximum and a skewness of  $< |1|$ . Skewed unimodal distributions were transformed using logarithmic or other transformations to reach normal distributions.

*Inference criteria.* The alpha level was adjusted to multiple comparisons (3 main tests per study sample), so that the significance threshold was set to  $p < 0.05/3 = 0.0167$ , and  $p < 0.05$  for all other models.

### Exploratory analysis

(2) A voluntary decision to eat a plant-based meal (vegetarian or vegan) compared to an animal-based meal will be more frequently made upon planned decisions. Chi-square test performed for categorical outcome (planned vs. impulsive decision):

`chisq.test(meal, decision)`

(3) Higher fiber content in the meals will mediate higher mood and satiety and lower stress, whereas higher unrefined sugar and fat content will mediate the opposite.

Deviating from the pre-registration, models (and planned mediation analyses) for fiber content *could not be performed*, as data was not available.

(4) The former potential effects (2) will be masked in participants that followed, and in particular in those that also disliked, a non-voluntary decision of meal category. “decision” will be defined in three levels, as “voluntary vs. non-voluntary-liked vs non-voluntary-disliked”:

R1=lmer (mood ~ timepoint + decision\_liking + meal\*decision\_liking + meal + (1|subject) + (1|Mensa))

Null model =lmer (mood ~ timepoint + decision\_liking + meal + (1|subject) + (1|Mensa))

Two more models accordingly for hunger and stress. We further speculate that energy intake (kcal), fluids, meal ratings, daytime, environment, lifestyle and dietary habits, social interaction, personality traits and other factors such as age and sex may modulate the above effects.

Therefore, we included those variables additionally as factors into the above described models.

*Inference criteria.* The alpha level was set to  $p < 0.05$  due to the exploratory nature of the analysis if not stated otherwise.

## **Author Contribution**

EM, AV, AVW: study conception and design; EM, LdB, MZ: data collection and data management; EM: data curation; AVW: meal category labeling for the app-study; EM, AVW: data analysis of all sub-studies; EM: data visualization; EM, AVW: first manuscript draft. All authors contributed to and accepted the final manuscript.

## **Conflict of interest**

Authors had the following dietary adherences at the time of study: omnivorous (LdB, AV), vegetarian (AVW), vegan (EM, MZ).

## **Acknowledgments**

We would like to thank Maria Paerisch for the administrative advice and support for setting up the three online studies, Lena Weidert for initial data curation of sub-studies two and three and David Villringer for initial data analysis of the app study. Also we thank AIMPULSE Intelligent Systems GmbH, Bremen, Germany and the local Studierendenwerke (student unions) for integrating our study into their services and for providing the data. We also thank all the volunteers who participated in the studies.

## **Funding**

Funding was provided by the Max Planck Society and a promotion stipend by the German Federal Environmental Foundation (EM). Open Access funding enabled and organized by Projekt DEAL.

## References

1. Willett W, Rockström J, Loken B, et al (2019) Food in the Anthropocene: the EAT–Lancet Commission on healthy diets from sustainable food systems. *Lancet* 393:447–492
2. Clark MA, Springmann M, Hill J, Tilman D (2019) Multiple health and environmental impacts of foods. *Proc Natl Acad Sci* 116:23357–23362
3. Medawar E, Huhn S, Villringer A, Witte AV (2019) The effects of plant-based diets on the body and the brain: A systematic review. *Transl Psychiatry* 9:
4. Medawar E, Enzenbach C, Roehr S, et al (2020) Less Animal-Based Food, Better Weight Status: Associations of the Restriction of Animal-Based Product Intake with Body-Mass-Index, Depressive Symptoms and Personality in the General Population. *Nutr* 2020, Vol 12, Page 1492 12:1492. <https://doi.org/10.3390/NU12051492>
5. Reynolds A, Mann J, Cummings J, et al (2019) Carbohydrate quality and human health: a series of systematic reviews and meta-analyses. *Lancet*. [https://doi.org/10.1016/S0140-6736\(18\)31809-9](https://doi.org/10.1016/S0140-6736(18)31809-9)
6. O’Keefe SJ (2019) The association between dietary fibre deficiency and high-income lifestyle-associated diseases: Burkitt’s hypothesis revisited. *Lancet Gastroenterol. Hepatol.* 4:984–996
7. Berthoud HR, Münzberg H, Morrison CD (2017) Blaming the Brain for Obesity: Integration of Hedonic and Homeostatic Mechanisms. *Gastroenterology* 152:1728–1738. <https://doi.org/10.1053/j.gastro.2016.12.050>
8. Clegg M, Shafat A (2010) Energy and macronutrient composition of breakfast affect gastric emptying of lunch and subsequent food intake, satiety and satiation. *Appetite* 54:517–523. <https://doi.org/10.1016/j.appet.2010.02.005>
9. Poppitt SD, McCorMack D, Buffenstein R (1998) Short-term effects of macronutrient preloads on appetite and energy intake in lean women. *Physiol Behav* 64:279–285. [https://doi.org/10.1016/S0031-9384\(98\)00061-4](https://doi.org/10.1016/S0031-9384(98)00061-4)
10. Zanchi D, Depoorter A, Egloff L, et al (2017) The impact of gut hormones on the neural circuit of appetite and satiety: A systematic review. *Neurosci. Biobehav. Rev.* 80:457–475
11. Burger KS, Stice E (2014) Greater striatopallidal adaptive coding during cue–reward learning and food reward habituation predict future weight gain. *Neuroimage* 99:122–128. <https://doi.org/https://doi.org/10.1016/j.neuroimage.2014.05.066>
12. Jovanovski E, Mazhar N, Komishon A, et al (2020) Can dietary viscous fiber affect body weight independently of an energy-restrictive diet? A systematic review and meta-analysis of randomized controlled trials. *Am J Clin Nutr* 111:471–485. <https://doi.org/10.1093/ajcn/nqz292>
13. Dalile B, Van Oudenhove L, Vervliet B, Verbeke K (2019) The role of short-chain fatty acids in microbiota–gut–brain communication. *Nat. Rev. Gastroenterol. Hepatol.* 16:461–478
14. Clark MJ, Slavin JL (2013) The effect of fiber on satiety and food intake: A systematic

- review. *J Am Coll Nutr* 32:200–211. <https://doi.org/10.1080/07315724.2013.791194>
15. Muth AK, Park SQ (2021) The impact of dietary macronutrient intake on cognitive function and the brain. *Clin. Nutr.* 40:3999–4010
  16. Cani PD, Van Hul M, Lefort C, et al (2019) Microbial regulation of organismal energy homeostasis. *Nat. Metab.* 1:34–46
  17. Boswell RG, Sun W, Suzuki S, Kober H (2018) Training in cognitive strategies reduces eating and improves food choice. *Proc Natl Acad Sci U S A* 115:E11238–E11247. <https://doi.org/10.1073/pnas.1717092115>
  18. Ocklenburg S, Borawski J (2021) Vegetarian diet and depression scores: A meta-analysis. *J Affect Disord* 294:813–815. <https://doi.org/10.1016/j.jad.2021.07.098>
  19. Lassale C, Batty GD, Baghdadli A, et al (2019) Healthy dietary indices and risk of depressive outcomes: a systematic review and meta-analysis of observational studies. *Mol. Psychiatry* 24:965–986
  20. Taylor AM, Holscher HD (2020) A review of dietary and microbial connections to depression, anxiety, and stress. *Nutr. Neurosci.* 23:237–250
  21. Swann OG, Kilpatrick M, Breslin M, Oddy WH (2020) Dietary fiber and its associations with depression and inflammation. *Nutr. Rev.* 78:394–411
  22. Firth J, Firth J, Gangwisch JE, et al (2020) Food and mood: How do diet and nutrition affect mental wellbeing? *BMJ* 369:. <https://doi.org/10.1136/bmj.m2382>
  23. Broers VJ V., De Breucker C, Van den Broucke S, Luminet O (2017) A systematic review and meta-analysis of the effectiveness of nudging to increase fruit and vegetable choice. *Eur J Public Health* 27:912–920. <https://doi.org/10.1093/eurpub/ckx085>
  24. Garnett EE, Balmford A, Sandbrook C, et al (2019) Impact of increasing vegetarian availability on meal selection and sales in cafeterias. *Proc Natl Acad Sci* 116:20923–20929
  25. Papiés EK, Johannes N, Daneva T, et al (2020) Using consumption and reward simulations to increase the appeal of plant-based foods. *Appetite* 155:104812. <https://doi.org/10.1016/j.appet.2020.104812>
  26. Nielsen L V., Kristensen MD, Klingenberg L, et al (2018) Protein from meat or vegetable sources in meals matched for fiber content has similar effects on subjective appetite sensations and energy intake—A randomized acute cross-over meal test study. *Nutrients* 10:. <https://doi.org/10.3390/nu10010096>
  27. Griffith C, Piacquadio K, Braden M, Leidy H (2021) Effects of Protein Source and Quantity on Appetite Control, Satiety and Subsequent Food Intake in Healthy Adults. *Curr Dev Nutr* 5:409–409. [https://doi.org/10.1093/cdn/nzab038\\_021](https://doi.org/10.1093/cdn/nzab038_021)
  28. Klementova M, Thieme L, Haluzik M, et al (2019) A plant-based meal increases gastrointestinal hormones and satiety more than an energy-and macronutrient-matched processed-meat meal in t2d, obese, and healthy men: A three-group randomized crossover study. *Nutrients* 11:. <https://doi.org/10.3390/nu11010157>



29. Koch F, Heuer T, Krems C, Claupein E (2019) Meat consumers and non-meat consumers in Germany: A characterisation based on results of the German National Nutrition Survey II. *J Nutr Sci* 8:1–13. <https://doi.org/10.1017/jns.2019.17>
30. El-Salhy M, Ystad SO, Mazzawi T, Gundersen D (2017) Dietary fiber in irritable bowel syndrome (Review). *Int. J. Mol. Med.* 40:607–613
31. Clark MJ, Slavin JL (2013) The effect of fiber on satiety and food intake: A systematic review. *J Am Coll Nutr* 32:200–211. <https://doi.org/10.1080/07315724.2013.791194>
32. David LA, Maurice CF, Carmody RN, et al (2014) Diet rapidly and reproducibly alters the human gut microbiome. *Nature* 505:559–563. <https://doi.org/10.1038/nature12820>
33. Michel F, Knaapila A, Hartmann C, Siegrist M (2021) A multi-national comparison of meat eaters' attitudes and expectations for burgers containing beef, pea or algae protein. *Food Qual Prefer* 91:104195. <https://doi.org/10.1016/j.foodqual.2021.104195>
34. Strassner C (2019) Food, nutrition and health in Germany. In: *Nutritional and Health Aspects of Food in Western Europe*. Elsevier, pp 133–158
35. Biermann G, Rau H (2020) The meaning of meat: (Un)sustainable eating practices at home and out of home. *Appetite* 153:104730. <https://doi.org/10.1016/j.appet.2020.104730>
36. Dagevos H (2021) Finding flexitarians: Current studies on meat eaters and meat reducers. *Trends Food Sci. Technol.* 114:530–539
37. Vadiveloo M, Morwitz V, Chandon P (2013) The interplay of health claims and taste importance on food consumption and self-reported satiety. *Appetite* 71:349–356. <https://doi.org/10.1016/j.appet.2013.09.005>
38. Yin W, Hewson L, Linforth R, et al (2017) Effects of aroma and taste, independently or in combination, on appetite sensation and subsequent food intake. *Appetite* 114:265–274. <https://doi.org/10.1016/j.appet.2017.04.005>
39. DiFeliceantonio AG, Coppin G, Rigoux L, et al (2018) Supra-Additive Effects of Combining Fat and Carbohydrate on Food Reward. *Cell Metab* 28:33-44.e3. <https://doi.org/10.1016/j.cmet.2018.05.018>
40. Weltens N, Zhao D, Van Oudenhove L (2014) Where is the comfort in comfort foods? Mechanisms linking fat signaling, reward, and emotion. *Neurogastroenterol. Motil.* 26:303–315
41. Singh M (2014) Mood, food and obesity. *Front Psychol* 5:1–35. <https://doi.org/10.3389/fpsyg.2014.00925>
42. Löffler A, Luck T, Then FS, et al (2015) Age- and gender-specific norms for the German version of the Three-Factor Eating-Questionnaire (TFEQ). *Appetite* 91:241–247. <https://doi.org/10.1016/j.appet.2015.04.044>
43. Hilbert A, de Zwaan M, Braehler E (2012) How Frequent Are Eating Disturbances in the Population? Norms of the Eating Disorder Examination-Questionnaire. *PLoS One* 7:e29125. <https://doi.org/10.1371/journal.pone.0029125>

44. Rosenfeld DL (2020) Gender differences in vegetarian identity: How men and women construe meatless dieting. *Food Qual Prefer* 81:103859. <https://doi.org/10.1016/j.foodqual.2019.103859>
45. Grzymisławska M, Puch EA, Zawada A, Grzymisławski M (2020) Do nutritional behaviors depend on biological sex and cultural gender? *Adv Clin Exp Med Off organ Wroclaw Med Univ* 29:165–172
46. Wardle J, Haase AM, Steptoe A, et al (2004) Gender differences in food choice: The contribution of health beliefs and dieting. *Ann Behav Med* 27:107–116. [https://doi.org/10.1207/s15324796abm2702\\_5](https://doi.org/10.1207/s15324796abm2702_5)
47. Grammer AC, Vázquez MM, Fitzsimmons-Craft EE, et al (2021) Characterizing eating disorder diagnosis and related outcomes by sexual orientation and gender identity in a national sample of college students. *Eat Behav* 42:101528. <https://doi.org/10.1016/j.eatbeh.2021.101528>
48. Janssen M, Busch C, Rödiger M, Hamm U (2016) Motives of consumers following a vegan diet and their attitudes towards animal agriculture. *Appetite* 105:643–651. <https://doi.org/10.1016/j.appet.2016.06.039>
49. Brytek-Matera A (2021) Vegetarian diet and orthorexia nervosa: a review of the literature. *Eat. Weight Disord.* 26:1–11
50. Grootswagers T (2020) A primer on running human behavioural experiments online. *Behav Res Methods* 52:2283–2286. <https://doi.org/10.3758/s13428-020-01395-3>
51. Deehan EC, Walter J (2016) The Fiber Gap and the Disappearing Gut Microbiome: Implications for Human Nutrition. *Trends Endocrinol. Metab.* 27:239–242
52. Rosenfeld DL, Tomiyama AJ (2020) Taste and health concerns trump anticipated stigma as barriers to vegetarianism. *Appetite* 144:104469. <https://doi.org/10.1016/j.appet.2019.104469>
53. Clark MA, Springmann M, Hill J, Tilman D (2019) Multiple health and environmental impacts of foods. *Proc Natl Acad Sci U S A* 116:23357–23362. <https://doi.org/10.1073/pnas.1906908116>
54. Haftenberger M, Heuer T, Heidemann C, et al (2010) Relative validation of a food frequency questionnaire for national health and nutrition monitoring
55. Costa PT, McCrae RR (1989) NEO PI/FFI manual supplement for use with the NEO Personality Inventory and the NEO Five-Factor Inventory. Psychological Assessment Resources

## Figure Legends

Figure 1: Study design: Adults (m, f, d) consuming a single meal in university cafeterias rated hunger and mood using Likert scales before and after that meal with smartphones or mobile devices, in an app study ( $n_1 = 16,135$ , 5-point scales, top row) or in a more detailed web-based survey (omnivorous diet habits only, 10-point scales,  $n_2 = 173$ : free choice,  $n_3 = 71$ : randomized choice; middle row). Photos (bottom row) show exemplary pre- and post-meal plates for both meal categories. Photos are screenshots taken from iMensa app directly and meal photos provided by study participants (available at <https://osf.io/mqc5d/>).

Figure 2: Demographic factors and study sample descriptives of sub-studies 1, 2 and 3. Image rights: Freepik (smartphone, diet, water, network, eat, clock, broccoli, tofu, peas, chickpea, soy, vegan, sausage, chop, food), Smashicons (brain), DinosoftLabs (chicken leg), surgan (seafood).

Figure 3: Mean ratings of pre- and post-meal category for hunger, mood/contentment and stress. App-study ratings depicted in A) hunger B) mood, C) sub-study 2 with free meal choice ( $n=173$ ) and B) sub-study 3 with randomized meal allocation ( $n=78$ ). Median depicted as line, mean as dot, outliers (according to interquartile rule) as triangles.

Figure 4: Nutrient composition between meal categories in a subsample of the app-study ( $n_{\max} = 1262$ , data from app study). Macronutrient information per portion size for A) calories in kcal B) fat in grams C) saturated fats in grams D) carbohydrates in grams E) sugar in grams and F) protein in grams. Median depicted as line, outliers (according to interquartile rule) as dots.

Figure 5: Mean ratings of pre- and post-meal for hunger and mood by white flour vs. whole-grain flour bolognese meals (app-study only ( $n = 442$ ) depicted in A) hunger B) mood. Median depicted as line, mean as dot, outliers (according to interquartile rule) as triangles.

Figure 6: Effects of taste ratings on hunger and mood by star rating provided (app study only). A) Hunger ratings by taste rating from 1 to 5 stars B) Mood ratings by taste rating from 1 to 5 stars. Median depicted as line, mean as dot, outliers (according to interquartile rule) as small dots.

Figure 7: Correlation of post-pre changes between hunger and mood levels (app study only). Spearman's correlation and 99.9% CI.

Figure 8: Effects of gender on hunger and mood (app study only,  $n_{\text{male}} = 8291$ ,  $n_{\text{female}} = 7418$ ,  $n_{\text{diverse}} = 279$ ). Median depicted as line, mean as dot, outliers (according to interquartile rule) as triangles.

Figure 9: Post-randomization contentment and post-meal contentment and reasons for the latter (sub-study 2,  $n = 71$ ). A) Pre-meal allocation contentment rating (1-10 Likert scale) by meal category. Mean depicted as dot. B) Post-meal allocation contentment in categorical answers depicted as frequency by meal category. C) Reasons for post-meal contentment in categorical answers depicted as frequency by meal category. D) Reasons for post-meal discontentment in categorical answers depicted as frequency by meal category.

Table 1: Demographic information across studies.

Table 2: Ratings for hunger, mood, stress across all studies. Mean  $\pm$  SD. Significant models of interest compared to null model in bold (LMM comparison  $p < 0.001$ ).

SI Figure 1: Flowchart with sample size for all studies for all sub-analyses.

SI Figure 2: Frequency of meal category choice plotted by federal states across Germany (colour coding by local student union) for the app study. More detailed data available upon request. A: Berlin B: Saxony C: North-Rhine Westphalia D: Thuringa E: Bavaria F: Baden Württemberg G: Sachsen Anhalt H: Bremen I: Hamburg J: Hesse K: Saarland L: Brandenburg M: Mecklenburg Western Pomerania N: Lower Saxony O: Rhineland Palatinate P: Schleswig Holstein.

SI Figure 3: Participation numbers plotted by city and by meal category in time (studies 2+3).

SI Figure 4: Eating behaviour of individuals in sub-studies 2+3 for A) nutrient intake based on 1-week FFQ data and B) eating traits according to Three-Factor Eating Questionnaires subscales.

SI Figure 5: Correlation of post-pre changes between hunger, mood and stress levels for sub-studies 2 and 3. Spearman's correlation and 99.9% CI.

SI Figure 6: Frequency of taste ratings of meals per meal category per gender (app study only).

SI Figure 7: Frequency of taste ratings of meals per meal category per dietary adherence group (app study only).

SI Table 1: Macronutrient composition differences between meal categories ( $n_{\max} = 1262$ , data from app study).

SI Table 2: Interaction effects of taste ratings on hunger and mood post-meal (app study only).

SI Table 3: Interaction effects of meal category on hunger and mood for subgroups by gender (app study only).

SI Table 4: Interaction effects of meal category on hunger and mood for subgroups according to dietary adherence (app study only).

## Supporting Information

### Power calculation

The ethics proposal submitted to the institutional ethics board of the Medical Faculty of the University of Leipzig, Germany, (228/18-ek) included power calculations for all three studies.

For the app study, power calculation was based on a study by Koenig et al. (2018), resulting in a target sample size of 126, assuming the observed effect size. This study observed an effect in the eating decision behavior depending on the adaptation of a behavior model ( $\eta^2 = 0.03$ , corresponds to an effect size  $d = 0.35$  ([https://www.psychometrica.de/effect\\_size.html](https://www.psychometrica.de/effect_size.html))). However, it is difficult to estimate the effect size of our study, since many influencing factors cannot be determined within the framework of an app study. The analyses therefore remain largely explorative. Due to the large number of users of the app (currently: approx. 300,000 users, approx. 30,000 meal evaluations per month), groups of the same size can be pseudorandomized for better statistical evaluation. If 10% of active users are included in the study, 3,000 meal-well-being associations per month can be collected. Therefore, we assume to achieve a sufficient sample size to determine a possible effect.

Sub-studies 2 + 3 were based on the effect size of the study by Reed and Ones (2006) ( $d = 0.47$ ), which examined the effect of a one-time sporting activity on mood values (studies that examined the influence of a one-time meal on mood are missing so far). Study 2 has the following special features: a) a smaller effect was assumed ( $d = 0.30$ ) than in study 3, because of the absence of randomization, b) a dropout rate of 20% was added to the calculated sample size, c) a 1:3 distribution from plant-based dishes to meat dishes was assumed. Thus, based on the sample size of the power analysis of 172 test people, a sample size of 210 subjects suggested to observe the desired effect. For sub-study 3, power calculation is analogous to sub-study 2, but defers in the following points: a) effect size of the study by Reed and Ones (2006) was assumed ( $d = 0.47$ ), which investigated the effect of a one-time physical activity intervention on mood. Assuming a dropout rate of 20%, we assume that a targeted sample size from 85 (up to 6,300 portions per day in one of the locations of the Leipzig student union, source: Mensa on Park, see <https://www.l-iz.de/detector/movement-detector/2015/04/three-headed-team-takes-over-leading-of-the-mensa-am-park-des-studentenwerkes-leipzig-84262>).

### **Stopping rule**

When estimated sample sizes according to power calculation were met, data collection was stopped.

### **Data curation**

For detailed information on data curation for sub-studies 2+3, see <https://osf.io/ucq6r/>.

### **Meal choice descriptives**

Meals chosen by category were between 47-61% animal-based; with 55% animal-based in the app-study (8848 animal-based, 7287 plant-based) 61% animal-based in sub-study two (105 animal-based, 68 plant-based) and 47% animal-based in sub-study three (37 animal-based, 41 plant-based).

### **Meal photos**

Meal photos before and after meal intake were optionally uploaded by the participants in sub-studies two and three. Photos were used to check accordance with self-reported meal description, as well as time-stamp of the photos and compliance with study design for randomized choice in sub-study 3. All photos are stored at <https://osf.io/mqc5d/> and can be used for further nutrient analysis or other purposes upon request to the corresponding author.

### Sample descriptives

In the app-based study, planned meal decisions were more frequently made for plant-based (72%) compared to animal-based meals (62%). Eating alone was more frequent (23%), when having a plant-based compared to animal-based meal (21%). Finishing the chosen meal was slightly more frequently reported by individuals choosing an animal-based (87%) compared to plant-based meal (86%). Drinking volume before the meal, smartphone use and sleep was not different across meal categories. In sub-studies 2 and 3, neither body mass index (BMI) nor income nor general well-being differed across meal categories. Additionally, in sub-study 2 omnivores choosing a plant-based meal were characterized by similar habitual nutrient intake compared to omnivores choosing animal-based meals, except for significantly higher fiber intake ( $22 \pm 11$  vs.  $18 \pm 9$  g fiber / day) and significantly higher scores for cognitive restraint and hunger in the TFEQ subscales, **Table 1**). No differences in personality traits or general well-being were found. Respective differences were not significant for the randomized allocation samples in sub-study 3.

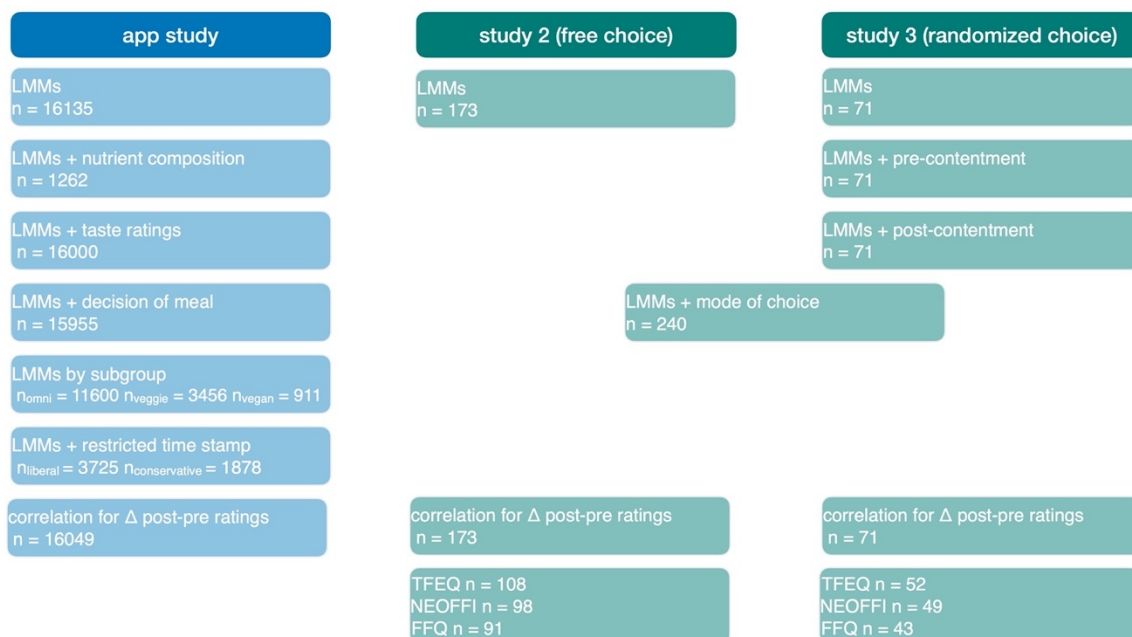

SI Figure 1: Flowchart with sample size for all studies for all sub-analyses.

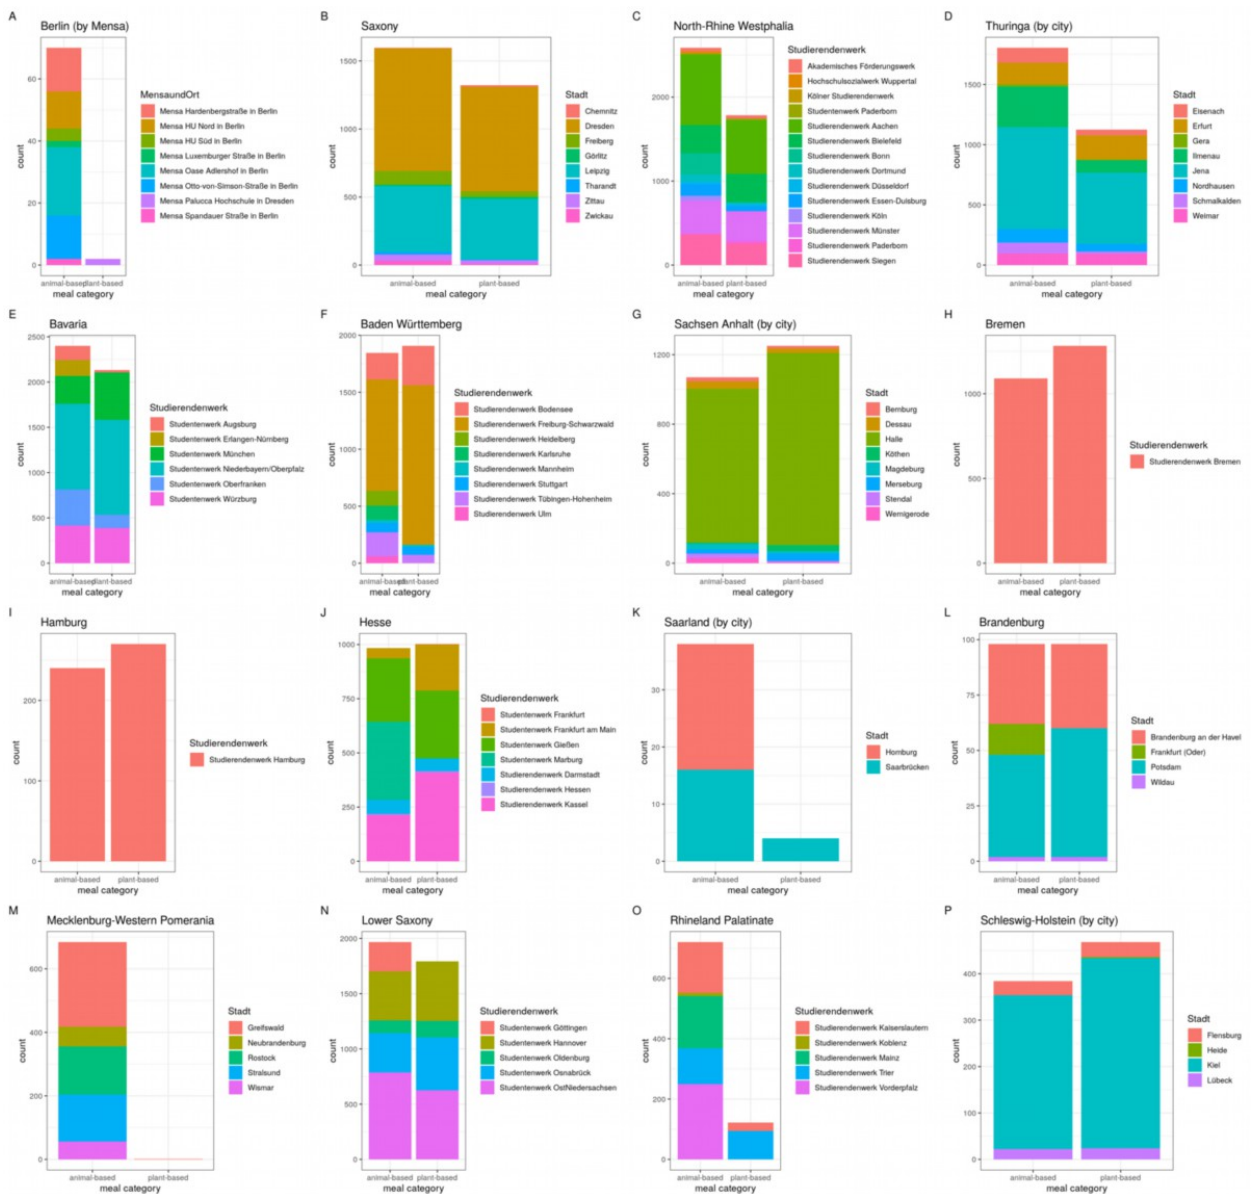

SI Figure 2: Frequency of meal category choice plotted by federal states across Germany (colour coding by local student union) for the app study. More detailed data available upon request. A: Berlin B: Saxony C: North-Rhine Westphalia D: Thuringia E: Bavaria F: Baden Württemberg G: Sachsen Anhalt H: Bremen I: Hamburg J: Hesse K: Saarland L: Brandenburg M: Mecklenburg Western Pomerania N: Lower Saxony O: Rhineland Palatinate P: Schleswig Holstein.



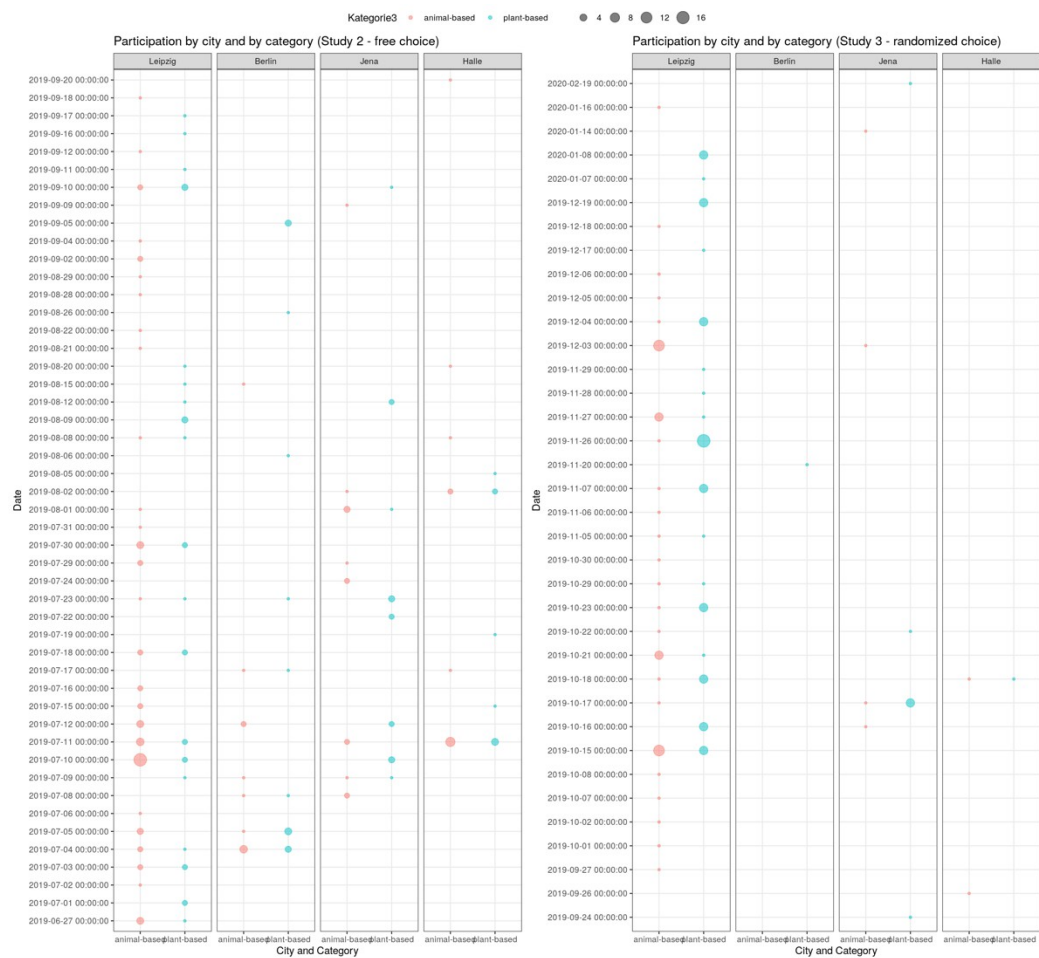

SI Figure 3: Participation numbers plotted by city and by meal category in time (studies 2+3).

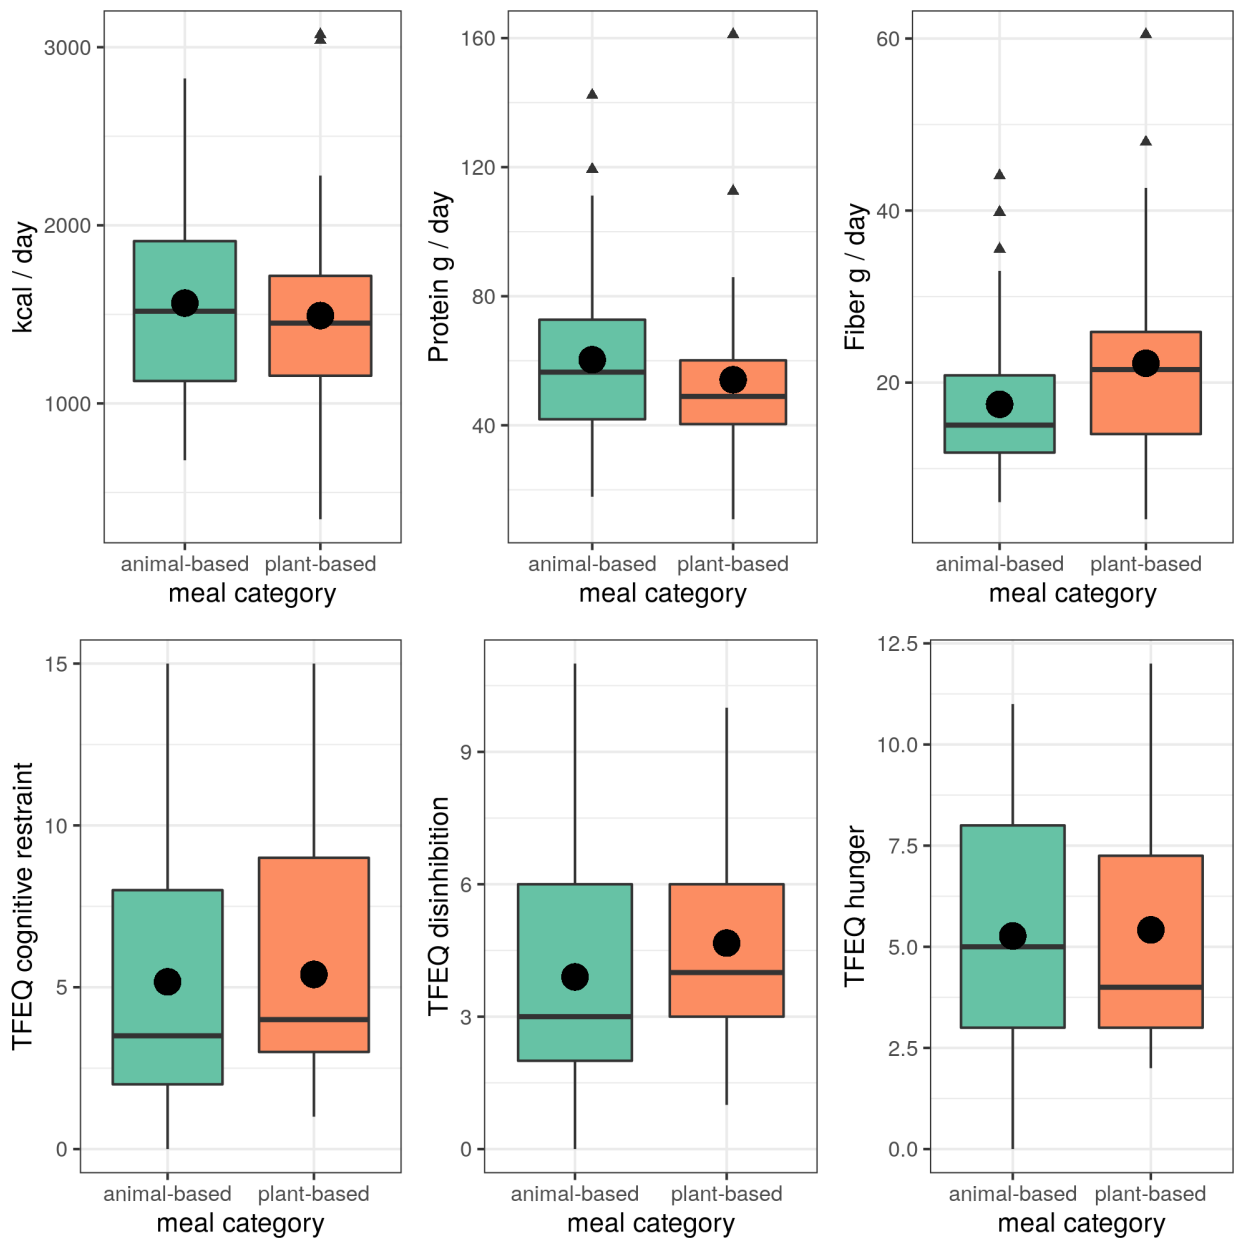

SI Figure 4: Eating behaviour of individuals in sub-studies 2+3 for A) nutrient intake based on 1-week FFQ data and B) eating traits according to Three-Factor Eating Questionnaires subscales.

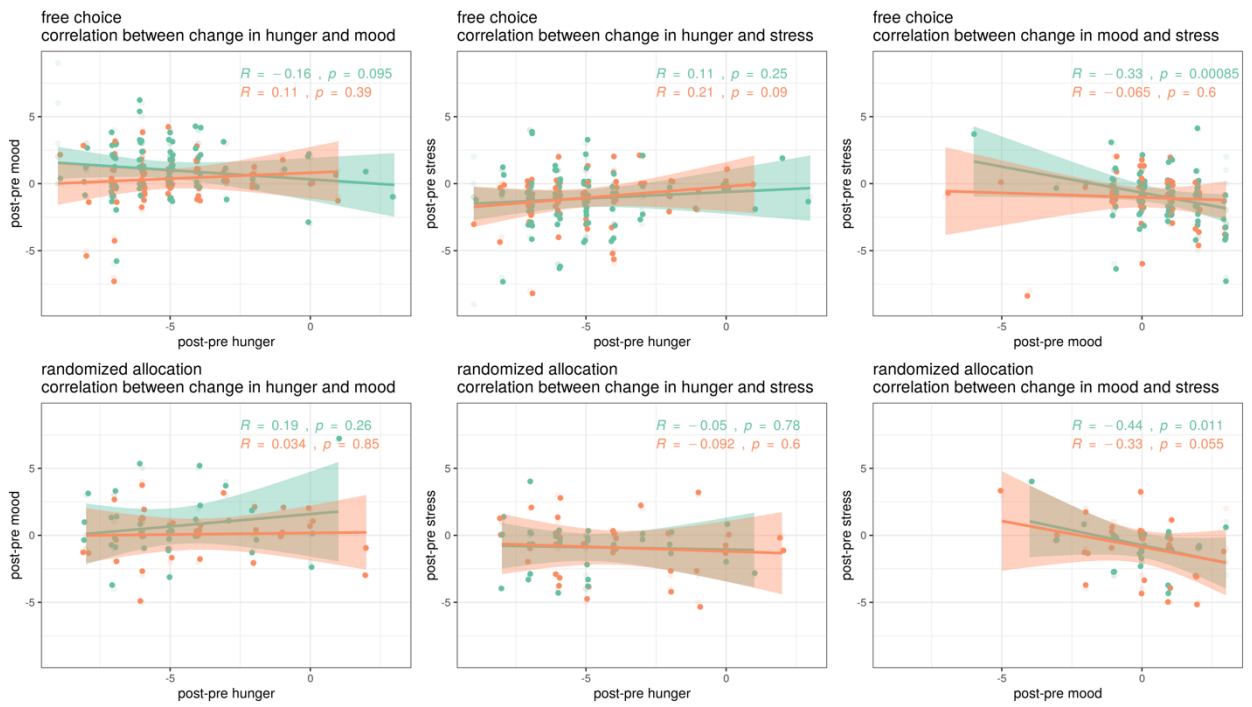

SI Figure 5: Correlation of post-pre changes between hunger, mood and stress levels for sub-studies 2 and 3. Spearman's correlation and 99.9% CI.

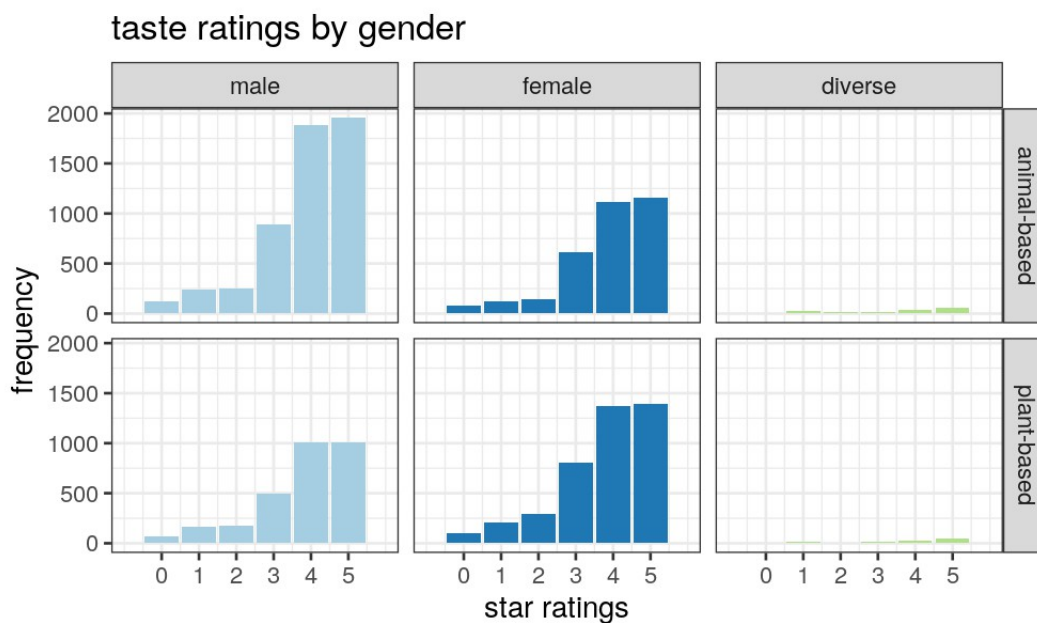

SI Figure 6: Frequency of taste ratings of meals per meal category per gender (app study only).

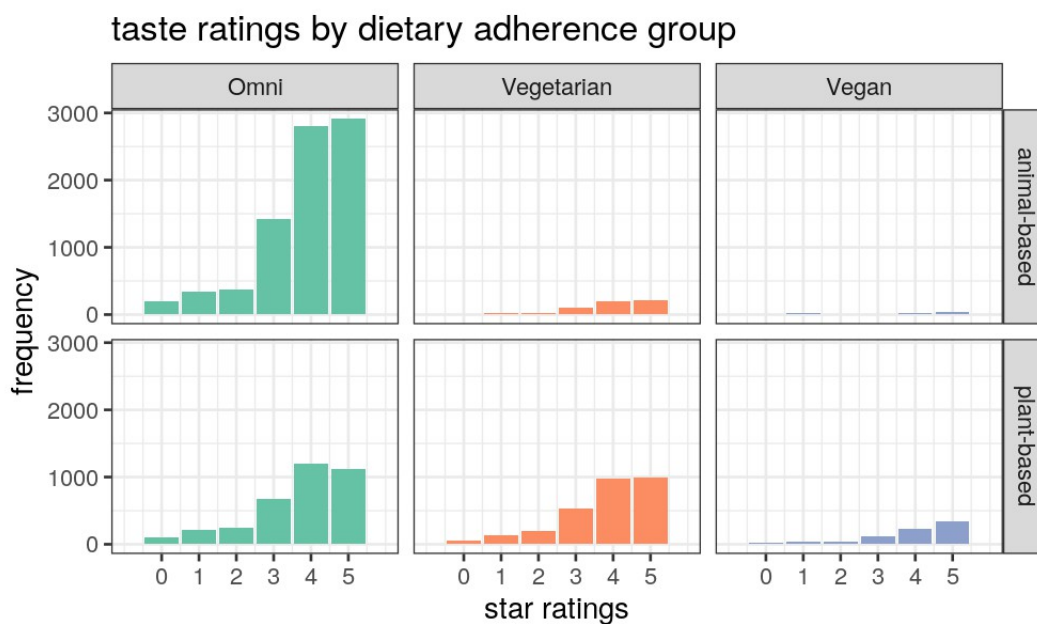

SI Figure 7: Frequency of taste ratings of meals per meal category per dietary adherence group (app study only).

SI Table 1: Macronutrient composition differences between meal categories ( $n_{\max} = 1262$ , data from app study).

| <b>Nutrient</b>           | <b>animal-based meal<br/>mean <math>\pm</math> SD</b> | <b>plant-based meal<br/>mean <math>\pm</math> SD</b> | <b>Wilcoxon<br/>p-value</b> |
|---------------------------|-------------------------------------------------------|------------------------------------------------------|-----------------------------|
| <b>Energy [kcal]</b>      | 591 $\pm$ 261                                         | 572 $\pm$ 251                                        | 0.34                        |
| <b>Carbohydrates [g]</b>  | 50 $\pm$ 38                                           | 71 $\pm$ 38                                          | <b>&lt;0.001</b>            |
| <b>Sugar [g]</b>          | 8 $\pm$ 5                                             | 12 $\pm$ 11                                          | <b>0.002</b>                |
| <b>Fat [g]</b>            | 28 $\pm$ 19                                           | 23 $\pm$ 16                                          | <b>&lt;0.001</b>            |
| <b>Saturated fats [g]</b> | 8 $\pm$ 7                                             | 8 $\pm$ 7                                            | 0.86                        |
| <b>Protein [g]</b>        | 34 $\pm$ 13                                           | 18 $\pm$ 10                                          | <b>&lt;0.001</b>            |
| <b>Fiber [g]</b>          | na                                                    | na                                                   |                             |

*Significant differences according to Wilcoxon tests between meal categories are marked in bold.*

SI Table 2: Interaction effects of taste ratings on hunger and mood post-meal (app study only).

|                                                   | hunger                                                                                                                                                                                                                                                                                                                                                                                                                                                                                                                                                                                                                                                                                                                                                                                                                                                                                                                                                                                                                                                                                                                                                                                                                                                                                                                                                                                                                                                                                                                                                                                                                                                                                                                                                                                                                                                                                                                                                                                                                                                                                                                                                                                                                                                                                                                                                                                                                                                                                                                                                                                                                                                                                                                                                                                                                                           |             | mood         |             |            |         |             |          |          |        |               |           |          |         |                         |           |          |        |             |           |          |        |             |           |          |        |             |           |          |        |             |           |          |        |             |           |          |        |                                       |          |          |       |                           |          |          |       |                           |          |          |       |                           |           |          |        |                           |           |          |        |                           |           |          |        |                                                                                                                                                                                                                                                                                                                                                                                                                                                                                                                                                                                                                                                                                                                                                                                                                                                                                                                                                                                                                                                                                                                                                                                                                                                                                                                                                                                                                                                                                                                                                                                                                                |          |          |          |                                     |          |             |          |                                     |          |               |          |                                     |          |                         |          |                                     |          |             |           |                                                   |           |             |           |                                                   |           |             |          |                                                   |           |             |          |                                                   |           |             |          |                                                   |           |                                       |           |                                                                                                                                                                                                                                                                                                                                                                                                                                                                                                                                                                                                                                                                                                                                                                                                                                                                                                                                                                                                                                                                                                                                                                                                                                                                                                                                                                                                                                                                                                                                                                                                                                                                                                                                                                                                                                                                                                                                                                                                                                                                                                                                                                                                                                                                                                                                                                                                                                                                                                                                                                                                                                                                                                                                                                      |        |                           |           |            |         |                           |           |          |         |                           |           |          |        |                           |          |          |       |                           |          |          |       |             |          |         |        |             |         |         |       |             |         |         |       |             |         |         |       |                                       |          |         |        |                           |          |         |         |                           |          |         |        |                           |          |         |        |                           |         |         |       |                           |         |         |       |                                     |          |         |        |                                     |          |         |        |                                     |          |         |        |                                     |          |         |        |                                     |          |         |        |                                                   |         |         |       |                                                   |         |         |       |                                                   |         |         |       |                                                   |         |         |       |                                                   |         |         |       |
|---------------------------------------------------|--------------------------------------------------------------------------------------------------------------------------------------------------------------------------------------------------------------------------------------------------------------------------------------------------------------------------------------------------------------------------------------------------------------------------------------------------------------------------------------------------------------------------------------------------------------------------------------------------------------------------------------------------------------------------------------------------------------------------------------------------------------------------------------------------------------------------------------------------------------------------------------------------------------------------------------------------------------------------------------------------------------------------------------------------------------------------------------------------------------------------------------------------------------------------------------------------------------------------------------------------------------------------------------------------------------------------------------------------------------------------------------------------------------------------------------------------------------------------------------------------------------------------------------------------------------------------------------------------------------------------------------------------------------------------------------------------------------------------------------------------------------------------------------------------------------------------------------------------------------------------------------------------------------------------------------------------------------------------------------------------------------------------------------------------------------------------------------------------------------------------------------------------------------------------------------------------------------------------------------------------------------------------------------------------------------------------------------------------------------------------------------------------------------------------------------------------------------------------------------------------------------------------------------------------------------------------------------------------------------------------------------------------------------------------------------------------------------------------------------------------------------------------------------------------------------------------------------------------|-------------|--------------|-------------|------------|---------|-------------|----------|----------|--------|---------------|-----------|----------|---------|-------------------------|-----------|----------|--------|-------------|-----------|----------|--------|-------------|-----------|----------|--------|-------------|-----------|----------|--------|-------------|-----------|----------|--------|-------------|-----------|----------|--------|---------------------------------------|----------|----------|-------|---------------------------|----------|----------|-------|---------------------------|----------|----------|-------|---------------------------|-----------|----------|--------|---------------------------|-----------|----------|--------|---------------------------|-----------|----------|--------|--------------------------------------------------------------------------------------------------------------------------------------------------------------------------------------------------------------------------------------------------------------------------------------------------------------------------------------------------------------------------------------------------------------------------------------------------------------------------------------------------------------------------------------------------------------------------------------------------------------------------------------------------------------------------------------------------------------------------------------------------------------------------------------------------------------------------------------------------------------------------------------------------------------------------------------------------------------------------------------------------------------------------------------------------------------------------------------------------------------------------------------------------------------------------------------------------------------------------------------------------------------------------------------------------------------------------------------------------------------------------------------------------------------------------------------------------------------------------------------------------------------------------------------------------------------------------------------------------------------------------------|----------|----------|----------|-------------------------------------|----------|-------------|----------|-------------------------------------|----------|---------------|----------|-------------------------------------|----------|-------------------------|----------|-------------------------------------|----------|-------------|-----------|---------------------------------------------------|-----------|-------------|-----------|---------------------------------------------------|-----------|-------------|----------|---------------------------------------------------|-----------|-------------|----------|---------------------------------------------------|-----------|-------------|----------|---------------------------------------------------|-----------|---------------------------------------|-----------|----------------------------------------------------------------------------------------------------------------------------------------------------------------------------------------------------------------------------------------------------------------------------------------------------------------------------------------------------------------------------------------------------------------------------------------------------------------------------------------------------------------------------------------------------------------------------------------------------------------------------------------------------------------------------------------------------------------------------------------------------------------------------------------------------------------------------------------------------------------------------------------------------------------------------------------------------------------------------------------------------------------------------------------------------------------------------------------------------------------------------------------------------------------------------------------------------------------------------------------------------------------------------------------------------------------------------------------------------------------------------------------------------------------------------------------------------------------------------------------------------------------------------------------------------------------------------------------------------------------------------------------------------------------------------------------------------------------------------------------------------------------------------------------------------------------------------------------------------------------------------------------------------------------------------------------------------------------------------------------------------------------------------------------------------------------------------------------------------------------------------------------------------------------------------------------------------------------------------------------------------------------------------------------------------------------------------------------------------------------------------------------------------------------------------------------------------------------------------------------------------------------------------------------------------------------------------------------------------------------------------------------------------------------------------------------------------------------------------------------------------------------------|--------|---------------------------|-----------|------------|---------|---------------------------|-----------|----------|---------|---------------------------|-----------|----------|--------|---------------------------|----------|----------|-------|---------------------------|----------|----------|-------|-------------|----------|---------|--------|-------------|---------|---------|-------|-------------|---------|---------|-------|-------------|---------|---------|-------|---------------------------------------|----------|---------|--------|---------------------------|----------|---------|---------|---------------------------|----------|---------|--------|---------------------------|----------|---------|--------|---------------------------|---------|---------|-------|---------------------------|---------|---------|-------|-------------------------------------|----------|---------|--------|-------------------------------------|----------|---------|--------|-------------------------------------|----------|---------|--------|-------------------------------------|----------|---------|--------|-------------------------------------|----------|---------|--------|---------------------------------------------------|---------|---------|-------|---------------------------------------------------|---------|---------|-------|---------------------------------------------------|---------|---------|-------|---------------------------------------------------|---------|---------|-------|---------------------------------------------------|---------|---------|-------|
| app-based (5-point)<br>n = 16000 valid            | animal-based                                                                                                                                                                                                                                                                                                                                                                                                                                                                                                                                                                                                                                                                                                                                                                                                                                                                                                                                                                                                                                                                                                                                                                                                                                                                                                                                                                                                                                                                                                                                                                                                                                                                                                                                                                                                                                                                                                                                                                                                                                                                                                                                                                                                                                                                                                                                                                                                                                                                                                                                                                                                                                                                                                                                                                                                                                     | plant-based | animal-based | plant-based |            |         |             |          |          |        |               |           |          |         |                         |           |          |        |             |           |          |        |             |           |          |        |             |           |          |        |             |           |          |        |             |           |          |        |                                       |          |          |       |                           |          |          |       |                           |          |          |       |                           |           |          |        |                           |           |          |        |                           |           |          |        |                                                                                                                                                                                                                                                                                                                                                                                                                                                                                                                                                                                                                                                                                                                                                                                                                                                                                                                                                                                                                                                                                                                                                                                                                                                                                                                                                                                                                                                                                                                                                                                                                                |          |          |          |                                     |          |             |          |                                     |          |               |          |                                     |          |                         |          |                                     |          |             |           |                                                   |           |             |           |                                                   |           |             |          |                                                   |           |             |          |                                                   |           |             |          |                                                   |           |                                       |           |                                                                                                                                                                                                                                                                                                                                                                                                                                                                                                                                                                                                                                                                                                                                                                                                                                                                                                                                                                                                                                                                                                                                                                                                                                                                                                                                                                                                                                                                                                                                                                                                                                                                                                                                                                                                                                                                                                                                                                                                                                                                                                                                                                                                                                                                                                                                                                                                                                                                                                                                                                                                                                                                                                                                                                      |        |                           |           |            |         |                           |           |          |         |                           |           |          |        |                           |          |          |       |                           |          |          |       |             |          |         |        |             |         |         |       |             |         |         |       |             |         |         |       |                                       |          |         |        |                           |          |         |         |                           |          |         |        |                           |          |         |        |                           |         |         |       |                           |         |         |       |                                     |          |         |        |                                     |          |         |        |                                     |          |         |        |                                     |          |         |        |                                     |          |         |        |                                                   |         |         |       |                                                   |         |         |       |                                                   |         |         |       |                                                   |         |         |       |                                                   |         |         |       |
| incl. taste ratings                               |                                                                                                                                                                                                                                                                                                                                                                                                                                                                                                                                                                                                                                                                                                                                                                                                                                                                                                                                                                                                                                                                                                                                                                                                                                                                                                                                                                                                                                                                                                                                                                                                                                                                                                                                                                                                                                                                                                                                                                                                                                                                                                                                                                                                                                                                                                                                                                                                                                                                                                                                                                                                                                                                                                                                                                                                                                                  |             |              |             |            |         |             |          |          |        |               |           |          |         |                         |           |          |        |             |           |          |        |             |           |          |        |             |           |          |        |             |           |          |        |             |           |          |        |                                       |          |          |       |                           |          |          |       |                           |          |          |       |                           |           |          |        |                           |           |          |        |                           |           |          |        |                                                                                                                                                                                                                                                                                                                                                                                                                                                                                                                                                                                                                                                                                                                                                                                                                                                                                                                                                                                                                                                                                                                                                                                                                                                                                                                                                                                                                                                                                                                                                                                                                                |          |          |          |                                     |          |             |          |                                     |          |               |          |                                     |          |                         |          |                                     |          |             |           |                                                   |           |             |           |                                                   |           |             |          |                                                   |           |             |          |                                                   |           |             |          |                                                   |           |                                       |           |                                                                                                                                                                                                                                                                                                                                                                                                                                                                                                                                                                                                                                                                                                                                                                                                                                                                                                                                                                                                                                                                                                                                                                                                                                                                                                                                                                                                                                                                                                                                                                                                                                                                                                                                                                                                                                                                                                                                                                                                                                                                                                                                                                                                                                                                                                                                                                                                                                                                                                                                                                                                                                                                                                                                                                      |        |                           |           |            |         |                           |           |          |         |                           |           |          |        |                           |          |          |       |                           |          |          |       |             |          |         |        |             |         |         |       |             |         |         |       |             |         |         |       |                                       |          |         |        |                           |          |         |         |                           |          |         |        |                           |          |         |        |                           |         |         |       |                           |         |         |       |                                     |          |         |        |                                     |          |         |        |                                     |          |         |        |                                     |          |         |        |                                     |          |         |        |                                                   |         |         |       |                                                   |         |         |       |                                                   |         |         |       |                                                   |         |         |       |                                                   |         |         |       |
| double interaction effect<br>tp*taste             | <p>Fixed effects:</p> <table border="1"> <thead> <tr> <th></th> <th>Estimate</th> <th>Std. Error</th> <th>t value</th> </tr> </thead> <tbody> <tr> <td>(Intercept)</td> <td>3.926288</td> <td>0.056690</td> <td>69.294</td> </tr> <tr> <td>timepointpost</td> <td>-1.686856</td> <td>0.070519</td> <td>-23.921</td> </tr> <tr> <td>meal_cat_corr_2021VEG*N</td> <td>-0.107515</td> <td>0.017840</td> <td>-6.027</td> </tr> <tr> <td>Sterne_rep1</td> <td>-0.087306</td> <td>0.067213</td> <td>-1.299</td> </tr> <tr> <td>Sterne_rep2</td> <td>-0.247315</td> <td>0.066097</td> <td>-3.742</td> </tr> <tr> <td>Sterne_rep3</td> <td>-0.263473</td> <td>0.058619</td> <td>-4.495</td> </tr> <tr> <td>Sterne_rep4</td> <td>-0.154983</td> <td>0.056920</td> <td>-2.723</td> </tr> <tr> <td>Sterne_rep5</td> <td>0.032319</td> <td>0.056861</td> <td>0.568</td> </tr> <tr> <td>timepointpost:meal_cat_corr_2021VEG*N</td> <td>0.005401</td> <td>0.021959</td> <td>0.246</td> </tr> <tr> <td>timepointpost:Sterne_rep1</td> <td>0.548135</td> <td>0.085418</td> <td>6.417</td> </tr> <tr> <td>timepointpost:Sterne_rep2</td> <td>0.128536</td> <td>0.083982</td> <td>1.531</td> </tr> <tr> <td>timepointpost:Sterne_rep3</td> <td>-0.150875</td> <td>0.074454</td> <td>-2.026</td> </tr> <tr> <td>timepointpost:Sterne_rep4</td> <td>-0.380888</td> <td>0.072315</td> <td>-5.267</td> </tr> <tr> <td>timepointpost:Sterne_rep5</td> <td>-0.526199</td> <td>0.072237</td> <td>-7.284</td> </tr> </tbody> </table> <p><b>post-meal*5stars: b = -0.53, t = -7.3</b></p> <p><b>model comparison</b><br/><b>p &lt; 2.2x10<sup>-16</sup></b></p>                                                                                                                                                                                                                                                                                                                                                                                                                                                                                                                                                                                                                                                                                                                                                                                                                                                                                                                                                                                                                                                                                                                                                                                                            |             |              | Estimate    | Std. Error | t value | (Intercept) | 3.926288 | 0.056690 | 69.294 | timepointpost | -1.686856 | 0.070519 | -23.921 | meal_cat_corr_2021VEG*N | -0.107515 | 0.017840 | -6.027 | Sterne_rep1 | -0.087306 | 0.067213 | -1.299 | Sterne_rep2 | -0.247315 | 0.066097 | -3.742 | Sterne_rep3 | -0.263473 | 0.058619 | -4.495 | Sterne_rep4 | -0.154983 | 0.056920 | -2.723 | Sterne_rep5 | 0.032319  | 0.056861 | 0.568  | timepointpost:meal_cat_corr_2021VEG*N | 0.005401 | 0.021959 | 0.246 | timepointpost:Sterne_rep1 | 0.548135 | 0.085418 | 6.417 | timepointpost:Sterne_rep2 | 0.128536 | 0.083982 | 1.531 | timepointpost:Sterne_rep3 | -0.150875 | 0.074454 | -2.026 | timepointpost:Sterne_rep4 | -0.380888 | 0.072315 | -5.267 | timepointpost:Sterne_rep5 | -0.526199 | 0.072237 | -7.284 | <p>Fixed effects:</p> <table border="1"> <thead> <tr> <th></th> <th>Estimate</th> <th>Std. Error</th> <th>t value</th> </tr> </thead> <tbody> <tr> <td>(Intercept)</td> <td>3.360827</td> <td>0.049121</td> <td>68.419</td> </tr> <tr> <td>timepointpost</td> <td>0.145961</td> <td>0.052293</td> <td>2.791</td> </tr> <tr> <td>meal_cat_corr_2021VEG*N</td> <td>0.054051</td> <td>0.015448</td> <td>3.499</td> </tr> <tr> <td>Sterne_rep1</td> <td>-0.002535</td> <td>0.057777</td> <td>-0.044</td> </tr> <tr> <td>Sterne_rep2</td> <td>-0.065526</td> <td>0.056820</td> <td>-1.153</td> </tr> <tr> <td>Sterne_rep3</td> <td>0.017549</td> <td>0.050397</td> <td>0.348</td> </tr> <tr> <td>Sterne_rep4</td> <td>0.133737</td> <td>0.048933</td> <td>2.733</td> </tr> <tr> <td>Sterne_rep5</td> <td>0.186256</td> <td>0.048883</td> <td>3.810</td> </tr> <tr> <td>timepointpost:meal_cat_corr_2021VEG*N</td> <td>-0.023818</td> <td>0.016240</td> <td>-1.467</td> </tr> <tr> <td>timepointpost:Sterne_rep1</td> <td>-1.251575</td> <td>0.063366</td> <td>-19.752</td> </tr> <tr> <td>timepointpost:Sterne_rep2</td> <td>-0.695215</td> <td>0.062218</td> <td>-11.174</td> </tr> <tr> <td>timepointpost:Sterne_rep3</td> <td>-0.135059</td> <td>0.055191</td> <td>-2.447</td> </tr> <tr> <td>timepointpost:Sterne_rep4</td> <td>0.179681</td> <td>0.053613</td> <td>3.351</td> </tr> <tr> <td>timepointpost:Sterne_rep5</td> <td>0.454303</td> <td>0.053555</td> <td>8.483</td> </tr> </tbody> </table> <p><b>post-meal*5stars: b = 0.45, t = 8.5</b></p> <p><b>model comparison</b><br/><b>p &lt; 2.2x10<sup>-16</sup></b></p> |          |          | Estimate | Std. Error                          | t value  | (Intercept) | 3.360827 | 0.049121                            | 68.419   | timepointpost | 0.145961 | 0.052293                            | 2.791    | meal_cat_corr_2021VEG*N | 0.054051 | 0.015448                            | 3.499    | Sterne_rep1 | -0.002535 | 0.057777                                          | -0.044    | Sterne_rep2 | -0.065526 | 0.056820                                          | -1.153    | Sterne_rep3 | 0.017549 | 0.050397                                          | 0.348     | Sterne_rep4 | 0.133737 | 0.048933                                          | 2.733     | Sterne_rep5 | 0.186256 | 0.048883                                          | 3.810     | timepointpost:meal_cat_corr_2021VEG*N | -0.023818 | 0.016240                                                                                                                                                                                                                                                                                                                                                                                                                                                                                                                                                                                                                                                                                                                                                                                                                                                                                                                                                                                                                                                                                                                                                                                                                                                                                                                                                                                                                                                                                                                                                                                                                                                                                                                                                                                                                                                                                                                                                                                                                                                                                                                                                                                                                                                                                                                                                                                                                                                                                                                                                                                                                                                                                                                                                             | -1.467 | timepointpost:Sterne_rep1 | -1.251575 | 0.063366   | -19.752 | timepointpost:Sterne_rep2 | -0.695215 | 0.062218 | -11.174 | timepointpost:Sterne_rep3 | -0.135059 | 0.055191 | -2.447 | timepointpost:Sterne_rep4 | 0.179681 | 0.053613 | 3.351 | timepointpost:Sterne_rep5 | 0.454303 | 0.053555 | 8.483 |             |          |         |        |             |         |         |       |             |         |         |       |             |         |         |       |                                       |          |         |        |                           |          |         |         |                           |          |         |        |                           |          |         |        |                           |         |         |       |                           |         |         |       |                                     |          |         |        |                                     |          |         |        |                                     |          |         |        |                                     |          |         |        |                                     |          |         |        |                                                   |         |         |       |                                                   |         |         |       |                                                   |         |         |       |                                                   |         |         |       |                                                   |         |         |       |
|                                                   | Estimate                                                                                                                                                                                                                                                                                                                                                                                                                                                                                                                                                                                                                                                                                                                                                                                                                                                                                                                                                                                                                                                                                                                                                                                                                                                                                                                                                                                                                                                                                                                                                                                                                                                                                                                                                                                                                                                                                                                                                                                                                                                                                                                                                                                                                                                                                                                                                                                                                                                                                                                                                                                                                                                                                                                                                                                                                                         | Std. Error  | t value      |             |            |         |             |          |          |        |               |           |          |         |                         |           |          |        |             |           |          |        |             |           |          |        |             |           |          |        |             |           |          |        |             |           |          |        |                                       |          |          |       |                           |          |          |       |                           |          |          |       |                           |           |          |        |                           |           |          |        |                           |           |          |        |                                                                                                                                                                                                                                                                                                                                                                                                                                                                                                                                                                                                                                                                                                                                                                                                                                                                                                                                                                                                                                                                                                                                                                                                                                                                                                                                                                                                                                                                                                                                                                                                                                |          |          |          |                                     |          |             |          |                                     |          |               |          |                                     |          |                         |          |                                     |          |             |           |                                                   |           |             |           |                                                   |           |             |          |                                                   |           |             |          |                                                   |           |             |          |                                                   |           |                                       |           |                                                                                                                                                                                                                                                                                                                                                                                                                                                                                                                                                                                                                                                                                                                                                                                                                                                                                                                                                                                                                                                                                                                                                                                                                                                                                                                                                                                                                                                                                                                                                                                                                                                                                                                                                                                                                                                                                                                                                                                                                                                                                                                                                                                                                                                                                                                                                                                                                                                                                                                                                                                                                                                                                                                                                                      |        |                           |           |            |         |                           |           |          |         |                           |           |          |        |                           |          |          |       |                           |          |          |       |             |          |         |        |             |         |         |       |             |         |         |       |             |         |         |       |                                       |          |         |        |                           |          |         |         |                           |          |         |        |                           |          |         |        |                           |         |         |       |                           |         |         |       |                                     |          |         |        |                                     |          |         |        |                                     |          |         |        |                                     |          |         |        |                                     |          |         |        |                                                   |         |         |       |                                                   |         |         |       |                                                   |         |         |       |                                                   |         |         |       |                                                   |         |         |       |
| (Intercept)                                       | 3.926288                                                                                                                                                                                                                                                                                                                                                                                                                                                                                                                                                                                                                                                                                                                                                                                                                                                                                                                                                                                                                                                                                                                                                                                                                                                                                                                                                                                                                                                                                                                                                                                                                                                                                                                                                                                                                                                                                                                                                                                                                                                                                                                                                                                                                                                                                                                                                                                                                                                                                                                                                                                                                                                                                                                                                                                                                                         | 0.056690    | 69.294       |             |            |         |             |          |          |        |               |           |          |         |                         |           |          |        |             |           |          |        |             |           |          |        |             |           |          |        |             |           |          |        |             |           |          |        |                                       |          |          |       |                           |          |          |       |                           |          |          |       |                           |           |          |        |                           |           |          |        |                           |           |          |        |                                                                                                                                                                                                                                                                                                                                                                                                                                                                                                                                                                                                                                                                                                                                                                                                                                                                                                                                                                                                                                                                                                                                                                                                                                                                                                                                                                                                                                                                                                                                                                                                                                |          |          |          |                                     |          |             |          |                                     |          |               |          |                                     |          |                         |          |                                     |          |             |           |                                                   |           |             |           |                                                   |           |             |          |                                                   |           |             |          |                                                   |           |             |          |                                                   |           |                                       |           |                                                                                                                                                                                                                                                                                                                                                                                                                                                                                                                                                                                                                                                                                                                                                                                                                                                                                                                                                                                                                                                                                                                                                                                                                                                                                                                                                                                                                                                                                                                                                                                                                                                                                                                                                                                                                                                                                                                                                                                                                                                                                                                                                                                                                                                                                                                                                                                                                                                                                                                                                                                                                                                                                                                                                                      |        |                           |           |            |         |                           |           |          |         |                           |           |          |        |                           |          |          |       |                           |          |          |       |             |          |         |        |             |         |         |       |             |         |         |       |             |         |         |       |                                       |          |         |        |                           |          |         |         |                           |          |         |        |                           |          |         |        |                           |         |         |       |                           |         |         |       |                                     |          |         |        |                                     |          |         |        |                                     |          |         |        |                                     |          |         |        |                                     |          |         |        |                                                   |         |         |       |                                                   |         |         |       |                                                   |         |         |       |                                                   |         |         |       |                                                   |         |         |       |
| timepointpost                                     | -1.686856                                                                                                                                                                                                                                                                                                                                                                                                                                                                                                                                                                                                                                                                                                                                                                                                                                                                                                                                                                                                                                                                                                                                                                                                                                                                                                                                                                                                                                                                                                                                                                                                                                                                                                                                                                                                                                                                                                                                                                                                                                                                                                                                                                                                                                                                                                                                                                                                                                                                                                                                                                                                                                                                                                                                                                                                                                        | 0.070519    | -23.921      |             |            |         |             |          |          |        |               |           |          |         |                         |           |          |        |             |           |          |        |             |           |          |        |             |           |          |        |             |           |          |        |             |           |          |        |                                       |          |          |       |                           |          |          |       |                           |          |          |       |                           |           |          |        |                           |           |          |        |                           |           |          |        |                                                                                                                                                                                                                                                                                                                                                                                                                                                                                                                                                                                                                                                                                                                                                                                                                                                                                                                                                                                                                                                                                                                                                                                                                                                                                                                                                                                                                                                                                                                                                                                                                                |          |          |          |                                     |          |             |          |                                     |          |               |          |                                     |          |                         |          |                                     |          |             |           |                                                   |           |             |           |                                                   |           |             |          |                                                   |           |             |          |                                                   |           |             |          |                                                   |           |                                       |           |                                                                                                                                                                                                                                                                                                                                                                                                                                                                                                                                                                                                                                                                                                                                                                                                                                                                                                                                                                                                                                                                                                                                                                                                                                                                                                                                                                                                                                                                                                                                                                                                                                                                                                                                                                                                                                                                                                                                                                                                                                                                                                                                                                                                                                                                                                                                                                                                                                                                                                                                                                                                                                                                                                                                                                      |        |                           |           |            |         |                           |           |          |         |                           |           |          |        |                           |          |          |       |                           |          |          |       |             |          |         |        |             |         |         |       |             |         |         |       |             |         |         |       |                                       |          |         |        |                           |          |         |         |                           |          |         |        |                           |          |         |        |                           |         |         |       |                           |         |         |       |                                     |          |         |        |                                     |          |         |        |                                     |          |         |        |                                     |          |         |        |                                     |          |         |        |                                                   |         |         |       |                                                   |         |         |       |                                                   |         |         |       |                                                   |         |         |       |                                                   |         |         |       |
| meal_cat_corr_2021VEG*N                           | -0.107515                                                                                                                                                                                                                                                                                                                                                                                                                                                                                                                                                                                                                                                                                                                                                                                                                                                                                                                                                                                                                                                                                                                                                                                                                                                                                                                                                                                                                                                                                                                                                                                                                                                                                                                                                                                                                                                                                                                                                                                                                                                                                                                                                                                                                                                                                                                                                                                                                                                                                                                                                                                                                                                                                                                                                                                                                                        | 0.017840    | -6.027       |             |            |         |             |          |          |        |               |           |          |         |                         |           |          |        |             |           |          |        |             |           |          |        |             |           |          |        |             |           |          |        |             |           |          |        |                                       |          |          |       |                           |          |          |       |                           |          |          |       |                           |           |          |        |                           |           |          |        |                           |           |          |        |                                                                                                                                                                                                                                                                                                                                                                                                                                                                                                                                                                                                                                                                                                                                                                                                                                                                                                                                                                                                                                                                                                                                                                                                                                                                                                                                                                                                                                                                                                                                                                                                                                |          |          |          |                                     |          |             |          |                                     |          |               |          |                                     |          |                         |          |                                     |          |             |           |                                                   |           |             |           |                                                   |           |             |          |                                                   |           |             |          |                                                   |           |             |          |                                                   |           |                                       |           |                                                                                                                                                                                                                                                                                                                                                                                                                                                                                                                                                                                                                                                                                                                                                                                                                                                                                                                                                                                                                                                                                                                                                                                                                                                                                                                                                                                                                                                                                                                                                                                                                                                                                                                                                                                                                                                                                                                                                                                                                                                                                                                                                                                                                                                                                                                                                                                                                                                                                                                                                                                                                                                                                                                                                                      |        |                           |           |            |         |                           |           |          |         |                           |           |          |        |                           |          |          |       |                           |          |          |       |             |          |         |        |             |         |         |       |             |         |         |       |             |         |         |       |                                       |          |         |        |                           |          |         |         |                           |          |         |        |                           |          |         |        |                           |         |         |       |                           |         |         |       |                                     |          |         |        |                                     |          |         |        |                                     |          |         |        |                                     |          |         |        |                                     |          |         |        |                                                   |         |         |       |                                                   |         |         |       |                                                   |         |         |       |                                                   |         |         |       |                                                   |         |         |       |
| Sterne_rep1                                       | -0.087306                                                                                                                                                                                                                                                                                                                                                                                                                                                                                                                                                                                                                                                                                                                                                                                                                                                                                                                                                                                                                                                                                                                                                                                                                                                                                                                                                                                                                                                                                                                                                                                                                                                                                                                                                                                                                                                                                                                                                                                                                                                                                                                                                                                                                                                                                                                                                                                                                                                                                                                                                                                                                                                                                                                                                                                                                                        | 0.067213    | -1.299       |             |            |         |             |          |          |        |               |           |          |         |                         |           |          |        |             |           |          |        |             |           |          |        |             |           |          |        |             |           |          |        |             |           |          |        |                                       |          |          |       |                           |          |          |       |                           |          |          |       |                           |           |          |        |                           |           |          |        |                           |           |          |        |                                                                                                                                                                                                                                                                                                                                                                                                                                                                                                                                                                                                                                                                                                                                                                                                                                                                                                                                                                                                                                                                                                                                                                                                                                                                                                                                                                                                                                                                                                                                                                                                                                |          |          |          |                                     |          |             |          |                                     |          |               |          |                                     |          |                         |          |                                     |          |             |           |                                                   |           |             |           |                                                   |           |             |          |                                                   |           |             |          |                                                   |           |             |          |                                                   |           |                                       |           |                                                                                                                                                                                                                                                                                                                                                                                                                                                                                                                                                                                                                                                                                                                                                                                                                                                                                                                                                                                                                                                                                                                                                                                                                                                                                                                                                                                                                                                                                                                                                                                                                                                                                                                                                                                                                                                                                                                                                                                                                                                                                                                                                                                                                                                                                                                                                                                                                                                                                                                                                                                                                                                                                                                                                                      |        |                           |           |            |         |                           |           |          |         |                           |           |          |        |                           |          |          |       |                           |          |          |       |             |          |         |        |             |         |         |       |             |         |         |       |             |         |         |       |                                       |          |         |        |                           |          |         |         |                           |          |         |        |                           |          |         |        |                           |         |         |       |                           |         |         |       |                                     |          |         |        |                                     |          |         |        |                                     |          |         |        |                                     |          |         |        |                                     |          |         |        |                                                   |         |         |       |                                                   |         |         |       |                                                   |         |         |       |                                                   |         |         |       |                                                   |         |         |       |
| Sterne_rep2                                       | -0.247315                                                                                                                                                                                                                                                                                                                                                                                                                                                                                                                                                                                                                                                                                                                                                                                                                                                                                                                                                                                                                                                                                                                                                                                                                                                                                                                                                                                                                                                                                                                                                                                                                                                                                                                                                                                                                                                                                                                                                                                                                                                                                                                                                                                                                                                                                                                                                                                                                                                                                                                                                                                                                                                                                                                                                                                                                                        | 0.066097    | -3.742       |             |            |         |             |          |          |        |               |           |          |         |                         |           |          |        |             |           |          |        |             |           |          |        |             |           |          |        |             |           |          |        |             |           |          |        |                                       |          |          |       |                           |          |          |       |                           |          |          |       |                           |           |          |        |                           |           |          |        |                           |           |          |        |                                                                                                                                                                                                                                                                                                                                                                                                                                                                                                                                                                                                                                                                                                                                                                                                                                                                                                                                                                                                                                                                                                                                                                                                                                                                                                                                                                                                                                                                                                                                                                                                                                |          |          |          |                                     |          |             |          |                                     |          |               |          |                                     |          |                         |          |                                     |          |             |           |                                                   |           |             |           |                                                   |           |             |          |                                                   |           |             |          |                                                   |           |             |          |                                                   |           |                                       |           |                                                                                                                                                                                                                                                                                                                                                                                                                                                                                                                                                                                                                                                                                                                                                                                                                                                                                                                                                                                                                                                                                                                                                                                                                                                                                                                                                                                                                                                                                                                                                                                                                                                                                                                                                                                                                                                                                                                                                                                                                                                                                                                                                                                                                                                                                                                                                                                                                                                                                                                                                                                                                                                                                                                                                                      |        |                           |           |            |         |                           |           |          |         |                           |           |          |        |                           |          |          |       |                           |          |          |       |             |          |         |        |             |         |         |       |             |         |         |       |             |         |         |       |                                       |          |         |        |                           |          |         |         |                           |          |         |        |                           |          |         |        |                           |         |         |       |                           |         |         |       |                                     |          |         |        |                                     |          |         |        |                                     |          |         |        |                                     |          |         |        |                                     |          |         |        |                                                   |         |         |       |                                                   |         |         |       |                                                   |         |         |       |                                                   |         |         |       |                                                   |         |         |       |
| Sterne_rep3                                       | -0.263473                                                                                                                                                                                                                                                                                                                                                                                                                                                                                                                                                                                                                                                                                                                                                                                                                                                                                                                                                                                                                                                                                                                                                                                                                                                                                                                                                                                                                                                                                                                                                                                                                                                                                                                                                                                                                                                                                                                                                                                                                                                                                                                                                                                                                                                                                                                                                                                                                                                                                                                                                                                                                                                                                                                                                                                                                                        | 0.058619    | -4.495       |             |            |         |             |          |          |        |               |           |          |         |                         |           |          |        |             |           |          |        |             |           |          |        |             |           |          |        |             |           |          |        |             |           |          |        |                                       |          |          |       |                           |          |          |       |                           |          |          |       |                           |           |          |        |                           |           |          |        |                           |           |          |        |                                                                                                                                                                                                                                                                                                                                                                                                                                                                                                                                                                                                                                                                                                                                                                                                                                                                                                                                                                                                                                                                                                                                                                                                                                                                                                                                                                                                                                                                                                                                                                                                                                |          |          |          |                                     |          |             |          |                                     |          |               |          |                                     |          |                         |          |                                     |          |             |           |                                                   |           |             |           |                                                   |           |             |          |                                                   |           |             |          |                                                   |           |             |          |                                                   |           |                                       |           |                                                                                                                                                                                                                                                                                                                                                                                                                                                                                                                                                                                                                                                                                                                                                                                                                                                                                                                                                                                                                                                                                                                                                                                                                                                                                                                                                                                                                                                                                                                                                                                                                                                                                                                                                                                                                                                                                                                                                                                                                                                                                                                                                                                                                                                                                                                                                                                                                                                                                                                                                                                                                                                                                                                                                                      |        |                           |           |            |         |                           |           |          |         |                           |           |          |        |                           |          |          |       |                           |          |          |       |             |          |         |        |             |         |         |       |             |         |         |       |             |         |         |       |                                       |          |         |        |                           |          |         |         |                           |          |         |        |                           |          |         |        |                           |         |         |       |                           |         |         |       |                                     |          |         |        |                                     |          |         |        |                                     |          |         |        |                                     |          |         |        |                                     |          |         |        |                                                   |         |         |       |                                                   |         |         |       |                                                   |         |         |       |                                                   |         |         |       |                                                   |         |         |       |
| Sterne_rep4                                       | -0.154983                                                                                                                                                                                                                                                                                                                                                                                                                                                                                                                                                                                                                                                                                                                                                                                                                                                                                                                                                                                                                                                                                                                                                                                                                                                                                                                                                                                                                                                                                                                                                                                                                                                                                                                                                                                                                                                                                                                                                                                                                                                                                                                                                                                                                                                                                                                                                                                                                                                                                                                                                                                                                                                                                                                                                                                                                                        | 0.056920    | -2.723       |             |            |         |             |          |          |        |               |           |          |         |                         |           |          |        |             |           |          |        |             |           |          |        |             |           |          |        |             |           |          |        |             |           |          |        |                                       |          |          |       |                           |          |          |       |                           |          |          |       |                           |           |          |        |                           |           |          |        |                           |           |          |        |                                                                                                                                                                                                                                                                                                                                                                                                                                                                                                                                                                                                                                                                                                                                                                                                                                                                                                                                                                                                                                                                                                                                                                                                                                                                                                                                                                                                                                                                                                                                                                                                                                |          |          |          |                                     |          |             |          |                                     |          |               |          |                                     |          |                         |          |                                     |          |             |           |                                                   |           |             |           |                                                   |           |             |          |                                                   |           |             |          |                                                   |           |             |          |                                                   |           |                                       |           |                                                                                                                                                                                                                                                                                                                                                                                                                                                                                                                                                                                                                                                                                                                                                                                                                                                                                                                                                                                                                                                                                                                                                                                                                                                                                                                                                                                                                                                                                                                                                                                                                                                                                                                                                                                                                                                                                                                                                                                                                                                                                                                                                                                                                                                                                                                                                                                                                                                                                                                                                                                                                                                                                                                                                                      |        |                           |           |            |         |                           |           |          |         |                           |           |          |        |                           |          |          |       |                           |          |          |       |             |          |         |        |             |         |         |       |             |         |         |       |             |         |         |       |                                       |          |         |        |                           |          |         |         |                           |          |         |        |                           |          |         |        |                           |         |         |       |                           |         |         |       |                                     |          |         |        |                                     |          |         |        |                                     |          |         |        |                                     |          |         |        |                                     |          |         |        |                                                   |         |         |       |                                                   |         |         |       |                                                   |         |         |       |                                                   |         |         |       |                                                   |         |         |       |
| Sterne_rep5                                       | 0.032319                                                                                                                                                                                                                                                                                                                                                                                                                                                                                                                                                                                                                                                                                                                                                                                                                                                                                                                                                                                                                                                                                                                                                                                                                                                                                                                                                                                                                                                                                                                                                                                                                                                                                                                                                                                                                                                                                                                                                                                                                                                                                                                                                                                                                                                                                                                                                                                                                                                                                                                                                                                                                                                                                                                                                                                                                                         | 0.056861    | 0.568        |             |            |         |             |          |          |        |               |           |          |         |                         |           |          |        |             |           |          |        |             |           |          |        |             |           |          |        |             |           |          |        |             |           |          |        |                                       |          |          |       |                           |          |          |       |                           |          |          |       |                           |           |          |        |                           |           |          |        |                           |           |          |        |                                                                                                                                                                                                                                                                                                                                                                                                                                                                                                                                                                                                                                                                                                                                                                                                                                                                                                                                                                                                                                                                                                                                                                                                                                                                                                                                                                                                                                                                                                                                                                                                                                |          |          |          |                                     |          |             |          |                                     |          |               |          |                                     |          |                         |          |                                     |          |             |           |                                                   |           |             |           |                                                   |           |             |          |                                                   |           |             |          |                                                   |           |             |          |                                                   |           |                                       |           |                                                                                                                                                                                                                                                                                                                                                                                                                                                                                                                                                                                                                                                                                                                                                                                                                                                                                                                                                                                                                                                                                                                                                                                                                                                                                                                                                                                                                                                                                                                                                                                                                                                                                                                                                                                                                                                                                                                                                                                                                                                                                                                                                                                                                                                                                                                                                                                                                                                                                                                                                                                                                                                                                                                                                                      |        |                           |           |            |         |                           |           |          |         |                           |           |          |        |                           |          |          |       |                           |          |          |       |             |          |         |        |             |         |         |       |             |         |         |       |             |         |         |       |                                       |          |         |        |                           |          |         |         |                           |          |         |        |                           |          |         |        |                           |         |         |       |                           |         |         |       |                                     |          |         |        |                                     |          |         |        |                                     |          |         |        |                                     |          |         |        |                                     |          |         |        |                                                   |         |         |       |                                                   |         |         |       |                                                   |         |         |       |                                                   |         |         |       |                                                   |         |         |       |
| timepointpost:meal_cat_corr_2021VEG*N             | 0.005401                                                                                                                                                                                                                                                                                                                                                                                                                                                                                                                                                                                                                                                                                                                                                                                                                                                                                                                                                                                                                                                                                                                                                                                                                                                                                                                                                                                                                                                                                                                                                                                                                                                                                                                                                                                                                                                                                                                                                                                                                                                                                                                                                                                                                                                                                                                                                                                                                                                                                                                                                                                                                                                                                                                                                                                                                                         | 0.021959    | 0.246        |             |            |         |             |          |          |        |               |           |          |         |                         |           |          |        |             |           |          |        |             |           |          |        |             |           |          |        |             |           |          |        |             |           |          |        |                                       |          |          |       |                           |          |          |       |                           |          |          |       |                           |           |          |        |                           |           |          |        |                           |           |          |        |                                                                                                                                                                                                                                                                                                                                                                                                                                                                                                                                                                                                                                                                                                                                                                                                                                                                                                                                                                                                                                                                                                                                                                                                                                                                                                                                                                                                                                                                                                                                                                                                                                |          |          |          |                                     |          |             |          |                                     |          |               |          |                                     |          |                         |          |                                     |          |             |           |                                                   |           |             |           |                                                   |           |             |          |                                                   |           |             |          |                                                   |           |             |          |                                                   |           |                                       |           |                                                                                                                                                                                                                                                                                                                                                                                                                                                                                                                                                                                                                                                                                                                                                                                                                                                                                                                                                                                                                                                                                                                                                                                                                                                                                                                                                                                                                                                                                                                                                                                                                                                                                                                                                                                                                                                                                                                                                                                                                                                                                                                                                                                                                                                                                                                                                                                                                                                                                                                                                                                                                                                                                                                                                                      |        |                           |           |            |         |                           |           |          |         |                           |           |          |        |                           |          |          |       |                           |          |          |       |             |          |         |        |             |         |         |       |             |         |         |       |             |         |         |       |                                       |          |         |        |                           |          |         |         |                           |          |         |        |                           |          |         |        |                           |         |         |       |                           |         |         |       |                                     |          |         |        |                                     |          |         |        |                                     |          |         |        |                                     |          |         |        |                                     |          |         |        |                                                   |         |         |       |                                                   |         |         |       |                                                   |         |         |       |                                                   |         |         |       |                                                   |         |         |       |
| timepointpost:Sterne_rep1                         | 0.548135                                                                                                                                                                                                                                                                                                                                                                                                                                                                                                                                                                                                                                                                                                                                                                                                                                                                                                                                                                                                                                                                                                                                                                                                                                                                                                                                                                                                                                                                                                                                                                                                                                                                                                                                                                                                                                                                                                                                                                                                                                                                                                                                                                                                                                                                                                                                                                                                                                                                                                                                                                                                                                                                                                                                                                                                                                         | 0.085418    | 6.417        |             |            |         |             |          |          |        |               |           |          |         |                         |           |          |        |             |           |          |        |             |           |          |        |             |           |          |        |             |           |          |        |             |           |          |        |                                       |          |          |       |                           |          |          |       |                           |          |          |       |                           |           |          |        |                           |           |          |        |                           |           |          |        |                                                                                                                                                                                                                                                                                                                                                                                                                                                                                                                                                                                                                                                                                                                                                                                                                                                                                                                                                                                                                                                                                                                                                                                                                                                                                                                                                                                                                                                                                                                                                                                                                                |          |          |          |                                     |          |             |          |                                     |          |               |          |                                     |          |                         |          |                                     |          |             |           |                                                   |           |             |           |                                                   |           |             |          |                                                   |           |             |          |                                                   |           |             |          |                                                   |           |                                       |           |                                                                                                                                                                                                                                                                                                                                                                                                                                                                                                                                                                                                                                                                                                                                                                                                                                                                                                                                                                                                                                                                                                                                                                                                                                                                                                                                                                                                                                                                                                                                                                                                                                                                                                                                                                                                                                                                                                                                                                                                                                                                                                                                                                                                                                                                                                                                                                                                                                                                                                                                                                                                                                                                                                                                                                      |        |                           |           |            |         |                           |           |          |         |                           |           |          |        |                           |          |          |       |                           |          |          |       |             |          |         |        |             |         |         |       |             |         |         |       |             |         |         |       |                                       |          |         |        |                           |          |         |         |                           |          |         |        |                           |          |         |        |                           |         |         |       |                           |         |         |       |                                     |          |         |        |                                     |          |         |        |                                     |          |         |        |                                     |          |         |        |                                     |          |         |        |                                                   |         |         |       |                                                   |         |         |       |                                                   |         |         |       |                                                   |         |         |       |                                                   |         |         |       |
| timepointpost:Sterne_rep2                         | 0.128536                                                                                                                                                                                                                                                                                                                                                                                                                                                                                                                                                                                                                                                                                                                                                                                                                                                                                                                                                                                                                                                                                                                                                                                                                                                                                                                                                                                                                                                                                                                                                                                                                                                                                                                                                                                                                                                                                                                                                                                                                                                                                                                                                                                                                                                                                                                                                                                                                                                                                                                                                                                                                                                                                                                                                                                                                                         | 0.083982    | 1.531        |             |            |         |             |          |          |        |               |           |          |         |                         |           |          |        |             |           |          |        |             |           |          |        |             |           |          |        |             |           |          |        |             |           |          |        |                                       |          |          |       |                           |          |          |       |                           |          |          |       |                           |           |          |        |                           |           |          |        |                           |           |          |        |                                                                                                                                                                                                                                                                                                                                                                                                                                                                                                                                                                                                                                                                                                                                                                                                                                                                                                                                                                                                                                                                                                                                                                                                                                                                                                                                                                                                                                                                                                                                                                                                                                |          |          |          |                                     |          |             |          |                                     |          |               |          |                                     |          |                         |          |                                     |          |             |           |                                                   |           |             |           |                                                   |           |             |          |                                                   |           |             |          |                                                   |           |             |          |                                                   |           |                                       |           |                                                                                                                                                                                                                                                                                                                                                                                                                                                                                                                                                                                                                                                                                                                                                                                                                                                                                                                                                                                                                                                                                                                                                                                                                                                                                                                                                                                                                                                                                                                                                                                                                                                                                                                                                                                                                                                                                                                                                                                                                                                                                                                                                                                                                                                                                                                                                                                                                                                                                                                                                                                                                                                                                                                                                                      |        |                           |           |            |         |                           |           |          |         |                           |           |          |        |                           |          |          |       |                           |          |          |       |             |          |         |        |             |         |         |       |             |         |         |       |             |         |         |       |                                       |          |         |        |                           |          |         |         |                           |          |         |        |                           |          |         |        |                           |         |         |       |                           |         |         |       |                                     |          |         |        |                                     |          |         |        |                                     |          |         |        |                                     |          |         |        |                                     |          |         |        |                                                   |         |         |       |                                                   |         |         |       |                                                   |         |         |       |                                                   |         |         |       |                                                   |         |         |       |
| timepointpost:Sterne_rep3                         | -0.150875                                                                                                                                                                                                                                                                                                                                                                                                                                                                                                                                                                                                                                                                                                                                                                                                                                                                                                                                                                                                                                                                                                                                                                                                                                                                                                                                                                                                                                                                                                                                                                                                                                                                                                                                                                                                                                                                                                                                                                                                                                                                                                                                                                                                                                                                                                                                                                                                                                                                                                                                                                                                                                                                                                                                                                                                                                        | 0.074454    | -2.026       |             |            |         |             |          |          |        |               |           |          |         |                         |           |          |        |             |           |          |        |             |           |          |        |             |           |          |        |             |           |          |        |             |           |          |        |                                       |          |          |       |                           |          |          |       |                           |          |          |       |                           |           |          |        |                           |           |          |        |                           |           |          |        |                                                                                                                                                                                                                                                                                                                                                                                                                                                                                                                                                                                                                                                                                                                                                                                                                                                                                                                                                                                                                                                                                                                                                                                                                                                                                                                                                                                                                                                                                                                                                                                                                                |          |          |          |                                     |          |             |          |                                     |          |               |          |                                     |          |                         |          |                                     |          |             |           |                                                   |           |             |           |                                                   |           |             |          |                                                   |           |             |          |                                                   |           |             |          |                                                   |           |                                       |           |                                                                                                                                                                                                                                                                                                                                                                                                                                                                                                                                                                                                                                                                                                                                                                                                                                                                                                                                                                                                                                                                                                                                                                                                                                                                                                                                                                                                                                                                                                                                                                                                                                                                                                                                                                                                                                                                                                                                                                                                                                                                                                                                                                                                                                                                                                                                                                                                                                                                                                                                                                                                                                                                                                                                                                      |        |                           |           |            |         |                           |           |          |         |                           |           |          |        |                           |          |          |       |                           |          |          |       |             |          |         |        |             |         |         |       |             |         |         |       |             |         |         |       |                                       |          |         |        |                           |          |         |         |                           |          |         |        |                           |          |         |        |                           |         |         |       |                           |         |         |       |                                     |          |         |        |                                     |          |         |        |                                     |          |         |        |                                     |          |         |        |                                     |          |         |        |                                                   |         |         |       |                                                   |         |         |       |                                                   |         |         |       |                                                   |         |         |       |                                                   |         |         |       |
| timepointpost:Sterne_rep4                         | -0.380888                                                                                                                                                                                                                                                                                                                                                                                                                                                                                                                                                                                                                                                                                                                                                                                                                                                                                                                                                                                                                                                                                                                                                                                                                                                                                                                                                                                                                                                                                                                                                                                                                                                                                                                                                                                                                                                                                                                                                                                                                                                                                                                                                                                                                                                                                                                                                                                                                                                                                                                                                                                                                                                                                                                                                                                                                                        | 0.072315    | -5.267       |             |            |         |             |          |          |        |               |           |          |         |                         |           |          |        |             |           |          |        |             |           |          |        |             |           |          |        |             |           |          |        |             |           |          |        |                                       |          |          |       |                           |          |          |       |                           |          |          |       |                           |           |          |        |                           |           |          |        |                           |           |          |        |                                                                                                                                                                                                                                                                                                                                                                                                                                                                                                                                                                                                                                                                                                                                                                                                                                                                                                                                                                                                                                                                                                                                                                                                                                                                                                                                                                                                                                                                                                                                                                                                                                |          |          |          |                                     |          |             |          |                                     |          |               |          |                                     |          |                         |          |                                     |          |             |           |                                                   |           |             |           |                                                   |           |             |          |                                                   |           |             |          |                                                   |           |             |          |                                                   |           |                                       |           |                                                                                                                                                                                                                                                                                                                                                                                                                                                                                                                                                                                                                                                                                                                                                                                                                                                                                                                                                                                                                                                                                                                                                                                                                                                                                                                                                                                                                                                                                                                                                                                                                                                                                                                                                                                                                                                                                                                                                                                                                                                                                                                                                                                                                                                                                                                                                                                                                                                                                                                                                                                                                                                                                                                                                                      |        |                           |           |            |         |                           |           |          |         |                           |           |          |        |                           |          |          |       |                           |          |          |       |             |          |         |        |             |         |         |       |             |         |         |       |             |         |         |       |                                       |          |         |        |                           |          |         |         |                           |          |         |        |                           |          |         |        |                           |         |         |       |                           |         |         |       |                                     |          |         |        |                                     |          |         |        |                                     |          |         |        |                                     |          |         |        |                                     |          |         |        |                                                   |         |         |       |                                                   |         |         |       |                                                   |         |         |       |                                                   |         |         |       |                                                   |         |         |       |
| timepointpost:Sterne_rep5                         | -0.526199                                                                                                                                                                                                                                                                                                                                                                                                                                                                                                                                                                                                                                                                                                                                                                                                                                                                                                                                                                                                                                                                                                                                                                                                                                                                                                                                                                                                                                                                                                                                                                                                                                                                                                                                                                                                                                                                                                                                                                                                                                                                                                                                                                                                                                                                                                                                                                                                                                                                                                                                                                                                                                                                                                                                                                                                                                        | 0.072237    | -7.284       |             |            |         |             |          |          |        |               |           |          |         |                         |           |          |        |             |           |          |        |             |           |          |        |             |           |          |        |             |           |          |        |             |           |          |        |                                       |          |          |       |                           |          |          |       |                           |          |          |       |                           |           |          |        |                           |           |          |        |                           |           |          |        |                                                                                                                                                                                                                                                                                                                                                                                                                                                                                                                                                                                                                                                                                                                                                                                                                                                                                                                                                                                                                                                                                                                                                                                                                                                                                                                                                                                                                                                                                                                                                                                                                                |          |          |          |                                     |          |             |          |                                     |          |               |          |                                     |          |                         |          |                                     |          |             |           |                                                   |           |             |           |                                                   |           |             |          |                                                   |           |             |          |                                                   |           |             |          |                                                   |           |                                       |           |                                                                                                                                                                                                                                                                                                                                                                                                                                                                                                                                                                                                                                                                                                                                                                                                                                                                                                                                                                                                                                                                                                                                                                                                                                                                                                                                                                                                                                                                                                                                                                                                                                                                                                                                                                                                                                                                                                                                                                                                                                                                                                                                                                                                                                                                                                                                                                                                                                                                                                                                                                                                                                                                                                                                                                      |        |                           |           |            |         |                           |           |          |         |                           |           |          |        |                           |          |          |       |                           |          |          |       |             |          |         |        |             |         |         |       |             |         |         |       |             |         |         |       |                                       |          |         |        |                           |          |         |         |                           |          |         |        |                           |          |         |        |                           |         |         |       |                           |         |         |       |                                     |          |         |        |                                     |          |         |        |                                     |          |         |        |                                     |          |         |        |                                     |          |         |        |                                                   |         |         |       |                                                   |         |         |       |                                                   |         |         |       |                                                   |         |         |       |                                                   |         |         |       |
|                                                   | Estimate                                                                                                                                                                                                                                                                                                                                                                                                                                                                                                                                                                                                                                                                                                                                                                                                                                                                                                                                                                                                                                                                                                                                                                                                                                                                                                                                                                                                                                                                                                                                                                                                                                                                                                                                                                                                                                                                                                                                                                                                                                                                                                                                                                                                                                                                                                                                                                                                                                                                                                                                                                                                                                                                                                                                                                                                                                         | Std. Error  | t value      |             |            |         |             |          |          |        |               |           |          |         |                         |           |          |        |             |           |          |        |             |           |          |        |             |           |          |        |             |           |          |        |             |           |          |        |                                       |          |          |       |                           |          |          |       |                           |          |          |       |                           |           |          |        |                           |           |          |        |                           |           |          |        |                                                                                                                                                                                                                                                                                                                                                                                                                                                                                                                                                                                                                                                                                                                                                                                                                                                                                                                                                                                                                                                                                                                                                                                                                                                                                                                                                                                                                                                                                                                                                                                                                                |          |          |          |                                     |          |             |          |                                     |          |               |          |                                     |          |                         |          |                                     |          |             |           |                                                   |           |             |           |                                                   |           |             |          |                                                   |           |             |          |                                                   |           |             |          |                                                   |           |                                       |           |                                                                                                                                                                                                                                                                                                                                                                                                                                                                                                                                                                                                                                                                                                                                                                                                                                                                                                                                                                                                                                                                                                                                                                                                                                                                                                                                                                                                                                                                                                                                                                                                                                                                                                                                                                                                                                                                                                                                                                                                                                                                                                                                                                                                                                                                                                                                                                                                                                                                                                                                                                                                                                                                                                                                                                      |        |                           |           |            |         |                           |           |          |         |                           |           |          |        |                           |          |          |       |                           |          |          |       |             |          |         |        |             |         |         |       |             |         |         |       |             |         |         |       |                                       |          |         |        |                           |          |         |         |                           |          |         |        |                           |          |         |        |                           |         |         |       |                           |         |         |       |                                     |          |         |        |                                     |          |         |        |                                     |          |         |        |                                     |          |         |        |                                     |          |         |        |                                                   |         |         |       |                                                   |         |         |       |                                                   |         |         |       |                                                   |         |         |       |                                                   |         |         |       |
| (Intercept)                                       | 3.360827                                                                                                                                                                                                                                                                                                                                                                                                                                                                                                                                                                                                                                                                                                                                                                                                                                                                                                                                                                                                                                                                                                                                                                                                                                                                                                                                                                                                                                                                                                                                                                                                                                                                                                                                                                                                                                                                                                                                                                                                                                                                                                                                                                                                                                                                                                                                                                                                                                                                                                                                                                                                                                                                                                                                                                                                                                         | 0.049121    | 68.419       |             |            |         |             |          |          |        |               |           |          |         |                         |           |          |        |             |           |          |        |             |           |          |        |             |           |          |        |             |           |          |        |             |           |          |        |                                       |          |          |       |                           |          |          |       |                           |          |          |       |                           |           |          |        |                           |           |          |        |                           |           |          |        |                                                                                                                                                                                                                                                                                                                                                                                                                                                                                                                                                                                                                                                                                                                                                                                                                                                                                                                                                                                                                                                                                                                                                                                                                                                                                                                                                                                                                                                                                                                                                                                                                                |          |          |          |                                     |          |             |          |                                     |          |               |          |                                     |          |                         |          |                                     |          |             |           |                                                   |           |             |           |                                                   |           |             |          |                                                   |           |             |          |                                                   |           |             |          |                                                   |           |                                       |           |                                                                                                                                                                                                                                                                                                                                                                                                                                                                                                                                                                                                                                                                                                                                                                                                                                                                                                                                                                                                                                                                                                                                                                                                                                                                                                                                                                                                                                                                                                                                                                                                                                                                                                                                                                                                                                                                                                                                                                                                                                                                                                                                                                                                                                                                                                                                                                                                                                                                                                                                                                                                                                                                                                                                                                      |        |                           |           |            |         |                           |           |          |         |                           |           |          |        |                           |          |          |       |                           |          |          |       |             |          |         |        |             |         |         |       |             |         |         |       |             |         |         |       |                                       |          |         |        |                           |          |         |         |                           |          |         |        |                           |          |         |        |                           |         |         |       |                           |         |         |       |                                     |          |         |        |                                     |          |         |        |                                     |          |         |        |                                     |          |         |        |                                     |          |         |        |                                                   |         |         |       |                                                   |         |         |       |                                                   |         |         |       |                                                   |         |         |       |                                                   |         |         |       |
| timepointpost                                     | 0.145961                                                                                                                                                                                                                                                                                                                                                                                                                                                                                                                                                                                                                                                                                                                                                                                                                                                                                                                                                                                                                                                                                                                                                                                                                                                                                                                                                                                                                                                                                                                                                                                                                                                                                                                                                                                                                                                                                                                                                                                                                                                                                                                                                                                                                                                                                                                                                                                                                                                                                                                                                                                                                                                                                                                                                                                                                                         | 0.052293    | 2.791        |             |            |         |             |          |          |        |               |           |          |         |                         |           |          |        |             |           |          |        |             |           |          |        |             |           |          |        |             |           |          |        |             |           |          |        |                                       |          |          |       |                           |          |          |       |                           |          |          |       |                           |           |          |        |                           |           |          |        |                           |           |          |        |                                                                                                                                                                                                                                                                                                                                                                                                                                                                                                                                                                                                                                                                                                                                                                                                                                                                                                                                                                                                                                                                                                                                                                                                                                                                                                                                                                                                                                                                                                                                                                                                                                |          |          |          |                                     |          |             |          |                                     |          |               |          |                                     |          |                         |          |                                     |          |             |           |                                                   |           |             |           |                                                   |           |             |          |                                                   |           |             |          |                                                   |           |             |          |                                                   |           |                                       |           |                                                                                                                                                                                                                                                                                                                                                                                                                                                                                                                                                                                                                                                                                                                                                                                                                                                                                                                                                                                                                                                                                                                                                                                                                                                                                                                                                                                                                                                                                                                                                                                                                                                                                                                                                                                                                                                                                                                                                                                                                                                                                                                                                                                                                                                                                                                                                                                                                                                                                                                                                                                                                                                                                                                                                                      |        |                           |           |            |         |                           |           |          |         |                           |           |          |        |                           |          |          |       |                           |          |          |       |             |          |         |        |             |         |         |       |             |         |         |       |             |         |         |       |                                       |          |         |        |                           |          |         |         |                           |          |         |        |                           |          |         |        |                           |         |         |       |                           |         |         |       |                                     |          |         |        |                                     |          |         |        |                                     |          |         |        |                                     |          |         |        |                                     |          |         |        |                                                   |         |         |       |                                                   |         |         |       |                                                   |         |         |       |                                                   |         |         |       |                                                   |         |         |       |
| meal_cat_corr_2021VEG*N                           | 0.054051                                                                                                                                                                                                                                                                                                                                                                                                                                                                                                                                                                                                                                                                                                                                                                                                                                                                                                                                                                                                                                                                                                                                                                                                                                                                                                                                                                                                                                                                                                                                                                                                                                                                                                                                                                                                                                                                                                                                                                                                                                                                                                                                                                                                                                                                                                                                                                                                                                                                                                                                                                                                                                                                                                                                                                                                                                         | 0.015448    | 3.499        |             |            |         |             |          |          |        |               |           |          |         |                         |           |          |        |             |           |          |        |             |           |          |        |             |           |          |        |             |           |          |        |             |           |          |        |                                       |          |          |       |                           |          |          |       |                           |          |          |       |                           |           |          |        |                           |           |          |        |                           |           |          |        |                                                                                                                                                                                                                                                                                                                                                                                                                                                                                                                                                                                                                                                                                                                                                                                                                                                                                                                                                                                                                                                                                                                                                                                                                                                                                                                                                                                                                                                                                                                                                                                                                                |          |          |          |                                     |          |             |          |                                     |          |               |          |                                     |          |                         |          |                                     |          |             |           |                                                   |           |             |           |                                                   |           |             |          |                                                   |           |             |          |                                                   |           |             |          |                                                   |           |                                       |           |                                                                                                                                                                                                                                                                                                                                                                                                                                                                                                                                                                                                                                                                                                                                                                                                                                                                                                                                                                                                                                                                                                                                                                                                                                                                                                                                                                                                                                                                                                                                                                                                                                                                                                                                                                                                                                                                                                                                                                                                                                                                                                                                                                                                                                                                                                                                                                                                                                                                                                                                                                                                                                                                                                                                                                      |        |                           |           |            |         |                           |           |          |         |                           |           |          |        |                           |          |          |       |                           |          |          |       |             |          |         |        |             |         |         |       |             |         |         |       |             |         |         |       |                                       |          |         |        |                           |          |         |         |                           |          |         |        |                           |          |         |        |                           |         |         |       |                           |         |         |       |                                     |          |         |        |                                     |          |         |        |                                     |          |         |        |                                     |          |         |        |                                     |          |         |        |                                                   |         |         |       |                                                   |         |         |       |                                                   |         |         |       |                                                   |         |         |       |                                                   |         |         |       |
| Sterne_rep1                                       | -0.002535                                                                                                                                                                                                                                                                                                                                                                                                                                                                                                                                                                                                                                                                                                                                                                                                                                                                                                                                                                                                                                                                                                                                                                                                                                                                                                                                                                                                                                                                                                                                                                                                                                                                                                                                                                                                                                                                                                                                                                                                                                                                                                                                                                                                                                                                                                                                                                                                                                                                                                                                                                                                                                                                                                                                                                                                                                        | 0.057777    | -0.044       |             |            |         |             |          |          |        |               |           |          |         |                         |           |          |        |             |           |          |        |             |           |          |        |             |           |          |        |             |           |          |        |             |           |          |        |                                       |          |          |       |                           |          |          |       |                           |          |          |       |                           |           |          |        |                           |           |          |        |                           |           |          |        |                                                                                                                                                                                                                                                                                                                                                                                                                                                                                                                                                                                                                                                                                                                                                                                                                                                                                                                                                                                                                                                                                                                                                                                                                                                                                                                                                                                                                                                                                                                                                                                                                                |          |          |          |                                     |          |             |          |                                     |          |               |          |                                     |          |                         |          |                                     |          |             |           |                                                   |           |             |           |                                                   |           |             |          |                                                   |           |             |          |                                                   |           |             |          |                                                   |           |                                       |           |                                                                                                                                                                                                                                                                                                                                                                                                                                                                                                                                                                                                                                                                                                                                                                                                                                                                                                                                                                                                                                                                                                                                                                                                                                                                                                                                                                                                                                                                                                                                                                                                                                                                                                                                                                                                                                                                                                                                                                                                                                                                                                                                                                                                                                                                                                                                                                                                                                                                                                                                                                                                                                                                                                                                                                      |        |                           |           |            |         |                           |           |          |         |                           |           |          |        |                           |          |          |       |                           |          |          |       |             |          |         |        |             |         |         |       |             |         |         |       |             |         |         |       |                                       |          |         |        |                           |          |         |         |                           |          |         |        |                           |          |         |        |                           |         |         |       |                           |         |         |       |                                     |          |         |        |                                     |          |         |        |                                     |          |         |        |                                     |          |         |        |                                     |          |         |        |                                                   |         |         |       |                                                   |         |         |       |                                                   |         |         |       |                                                   |         |         |       |                                                   |         |         |       |
| Sterne_rep2                                       | -0.065526                                                                                                                                                                                                                                                                                                                                                                                                                                                                                                                                                                                                                                                                                                                                                                                                                                                                                                                                                                                                                                                                                                                                                                                                                                                                                                                                                                                                                                                                                                                                                                                                                                                                                                                                                                                                                                                                                                                                                                                                                                                                                                                                                                                                                                                                                                                                                                                                                                                                                                                                                                                                                                                                                                                                                                                                                                        | 0.056820    | -1.153       |             |            |         |             |          |          |        |               |           |          |         |                         |           |          |        |             |           |          |        |             |           |          |        |             |           |          |        |             |           |          |        |             |           |          |        |                                       |          |          |       |                           |          |          |       |                           |          |          |       |                           |           |          |        |                           |           |          |        |                           |           |          |        |                                                                                                                                                                                                                                                                                                                                                                                                                                                                                                                                                                                                                                                                                                                                                                                                                                                                                                                                                                                                                                                                                                                                                                                                                                                                                                                                                                                                                                                                                                                                                                                                                                |          |          |          |                                     |          |             |          |                                     |          |               |          |                                     |          |                         |          |                                     |          |             |           |                                                   |           |             |           |                                                   |           |             |          |                                                   |           |             |          |                                                   |           |             |          |                                                   |           |                                       |           |                                                                                                                                                                                                                                                                                                                                                                                                                                                                                                                                                                                                                                                                                                                                                                                                                                                                                                                                                                                                                                                                                                                                                                                                                                                                                                                                                                                                                                                                                                                                                                                                                                                                                                                                                                                                                                                                                                                                                                                                                                                                                                                                                                                                                                                                                                                                                                                                                                                                                                                                                                                                                                                                                                                                                                      |        |                           |           |            |         |                           |           |          |         |                           |           |          |        |                           |          |          |       |                           |          |          |       |             |          |         |        |             |         |         |       |             |         |         |       |             |         |         |       |                                       |          |         |        |                           |          |         |         |                           |          |         |        |                           |          |         |        |                           |         |         |       |                           |         |         |       |                                     |          |         |        |                                     |          |         |        |                                     |          |         |        |                                     |          |         |        |                                     |          |         |        |                                                   |         |         |       |                                                   |         |         |       |                                                   |         |         |       |                                                   |         |         |       |                                                   |         |         |       |
| Sterne_rep3                                       | 0.017549                                                                                                                                                                                                                                                                                                                                                                                                                                                                                                                                                                                                                                                                                                                                                                                                                                                                                                                                                                                                                                                                                                                                                                                                                                                                                                                                                                                                                                                                                                                                                                                                                                                                                                                                                                                                                                                                                                                                                                                                                                                                                                                                                                                                                                                                                                                                                                                                                                                                                                                                                                                                                                                                                                                                                                                                                                         | 0.050397    | 0.348        |             |            |         |             |          |          |        |               |           |          |         |                         |           |          |        |             |           |          |        |             |           |          |        |             |           |          |        |             |           |          |        |             |           |          |        |                                       |          |          |       |                           |          |          |       |                           |          |          |       |                           |           |          |        |                           |           |          |        |                           |           |          |        |                                                                                                                                                                                                                                                                                                                                                                                                                                                                                                                                                                                                                                                                                                                                                                                                                                                                                                                                                                                                                                                                                                                                                                                                                                                                                                                                                                                                                                                                                                                                                                                                                                |          |          |          |                                     |          |             |          |                                     |          |               |          |                                     |          |                         |          |                                     |          |             |           |                                                   |           |             |           |                                                   |           |             |          |                                                   |           |             |          |                                                   |           |             |          |                                                   |           |                                       |           |                                                                                                                                                                                                                                                                                                                                                                                                                                                                                                                                                                                                                                                                                                                                                                                                                                                                                                                                                                                                                                                                                                                                                                                                                                                                                                                                                                                                                                                                                                                                                                                                                                                                                                                                                                                                                                                                                                                                                                                                                                                                                                                                                                                                                                                                                                                                                                                                                                                                                                                                                                                                                                                                                                                                                                      |        |                           |           |            |         |                           |           |          |         |                           |           |          |        |                           |          |          |       |                           |          |          |       |             |          |         |        |             |         |         |       |             |         |         |       |             |         |         |       |                                       |          |         |        |                           |          |         |         |                           |          |         |        |                           |          |         |        |                           |         |         |       |                           |         |         |       |                                     |          |         |        |                                     |          |         |        |                                     |          |         |        |                                     |          |         |        |                                     |          |         |        |                                                   |         |         |       |                                                   |         |         |       |                                                   |         |         |       |                                                   |         |         |       |                                                   |         |         |       |
| Sterne_rep4                                       | 0.133737                                                                                                                                                                                                                                                                                                                                                                                                                                                                                                                                                                                                                                                                                                                                                                                                                                                                                                                                                                                                                                                                                                                                                                                                                                                                                                                                                                                                                                                                                                                                                                                                                                                                                                                                                                                                                                                                                                                                                                                                                                                                                                                                                                                                                                                                                                                                                                                                                                                                                                                                                                                                                                                                                                                                                                                                                                         | 0.048933    | 2.733        |             |            |         |             |          |          |        |               |           |          |         |                         |           |          |        |             |           |          |        |             |           |          |        |             |           |          |        |             |           |          |        |             |           |          |        |                                       |          |          |       |                           |          |          |       |                           |          |          |       |                           |           |          |        |                           |           |          |        |                           |           |          |        |                                                                                                                                                                                                                                                                                                                                                                                                                                                                                                                                                                                                                                                                                                                                                                                                                                                                                                                                                                                                                                                                                                                                                                                                                                                                                                                                                                                                                                                                                                                                                                                                                                |          |          |          |                                     |          |             |          |                                     |          |               |          |                                     |          |                         |          |                                     |          |             |           |                                                   |           |             |           |                                                   |           |             |          |                                                   |           |             |          |                                                   |           |             |          |                                                   |           |                                       |           |                                                                                                                                                                                                                                                                                                                                                                                                                                                                                                                                                                                                                                                                                                                                                                                                                                                                                                                                                                                                                                                                                                                                                                                                                                                                                                                                                                                                                                                                                                                                                                                                                                                                                                                                                                                                                                                                                                                                                                                                                                                                                                                                                                                                                                                                                                                                                                                                                                                                                                                                                                                                                                                                                                                                                                      |        |                           |           |            |         |                           |           |          |         |                           |           |          |        |                           |          |          |       |                           |          |          |       |             |          |         |        |             |         |         |       |             |         |         |       |             |         |         |       |                                       |          |         |        |                           |          |         |         |                           |          |         |        |                           |          |         |        |                           |         |         |       |                           |         |         |       |                                     |          |         |        |                                     |          |         |        |                                     |          |         |        |                                     |          |         |        |                                     |          |         |        |                                                   |         |         |       |                                                   |         |         |       |                                                   |         |         |       |                                                   |         |         |       |                                                   |         |         |       |
| Sterne_rep5                                       | 0.186256                                                                                                                                                                                                                                                                                                                                                                                                                                                                                                                                                                                                                                                                                                                                                                                                                                                                                                                                                                                                                                                                                                                                                                                                                                                                                                                                                                                                                                                                                                                                                                                                                                                                                                                                                                                                                                                                                                                                                                                                                                                                                                                                                                                                                                                                                                                                                                                                                                                                                                                                                                                                                                                                                                                                                                                                                                         | 0.048883    | 3.810        |             |            |         |             |          |          |        |               |           |          |         |                         |           |          |        |             |           |          |        |             |           |          |        |             |           |          |        |             |           |          |        |             |           |          |        |                                       |          |          |       |                           |          |          |       |                           |          |          |       |                           |           |          |        |                           |           |          |        |                           |           |          |        |                                                                                                                                                                                                                                                                                                                                                                                                                                                                                                                                                                                                                                                                                                                                                                                                                                                                                                                                                                                                                                                                                                                                                                                                                                                                                                                                                                                                                                                                                                                                                                                                                                |          |          |          |                                     |          |             |          |                                     |          |               |          |                                     |          |                         |          |                                     |          |             |           |                                                   |           |             |           |                                                   |           |             |          |                                                   |           |             |          |                                                   |           |             |          |                                                   |           |                                       |           |                                                                                                                                                                                                                                                                                                                                                                                                                                                                                                                                                                                                                                                                                                                                                                                                                                                                                                                                                                                                                                                                                                                                                                                                                                                                                                                                                                                                                                                                                                                                                                                                                                                                                                                                                                                                                                                                                                                                                                                                                                                                                                                                                                                                                                                                                                                                                                                                                                                                                                                                                                                                                                                                                                                                                                      |        |                           |           |            |         |                           |           |          |         |                           |           |          |        |                           |          |          |       |                           |          |          |       |             |          |         |        |             |         |         |       |             |         |         |       |             |         |         |       |                                       |          |         |        |                           |          |         |         |                           |          |         |        |                           |          |         |        |                           |         |         |       |                           |         |         |       |                                     |          |         |        |                                     |          |         |        |                                     |          |         |        |                                     |          |         |        |                                     |          |         |        |                                                   |         |         |       |                                                   |         |         |       |                                                   |         |         |       |                                                   |         |         |       |                                                   |         |         |       |
| timepointpost:meal_cat_corr_2021VEG*N             | -0.023818                                                                                                                                                                                                                                                                                                                                                                                                                                                                                                                                                                                                                                                                                                                                                                                                                                                                                                                                                                                                                                                                                                                                                                                                                                                                                                                                                                                                                                                                                                                                                                                                                                                                                                                                                                                                                                                                                                                                                                                                                                                                                                                                                                                                                                                                                                                                                                                                                                                                                                                                                                                                                                                                                                                                                                                                                                        | 0.016240    | -1.467       |             |            |         |             |          |          |        |               |           |          |         |                         |           |          |        |             |           |          |        |             |           |          |        |             |           |          |        |             |           |          |        |             |           |          |        |                                       |          |          |       |                           |          |          |       |                           |          |          |       |                           |           |          |        |                           |           |          |        |                           |           |          |        |                                                                                                                                                                                                                                                                                                                                                                                                                                                                                                                                                                                                                                                                                                                                                                                                                                                                                                                                                                                                                                                                                                                                                                                                                                                                                                                                                                                                                                                                                                                                                                                                                                |          |          |          |                                     |          |             |          |                                     |          |               |          |                                     |          |                         |          |                                     |          |             |           |                                                   |           |             |           |                                                   |           |             |          |                                                   |           |             |          |                                                   |           |             |          |                                                   |           |                                       |           |                                                                                                                                                                                                                                                                                                                                                                                                                                                                                                                                                                                                                                                                                                                                                                                                                                                                                                                                                                                                                                                                                                                                                                                                                                                                                                                                                                                                                                                                                                                                                                                                                                                                                                                                                                                                                                                                                                                                                                                                                                                                                                                                                                                                                                                                                                                                                                                                                                                                                                                                                                                                                                                                                                                                                                      |        |                           |           |            |         |                           |           |          |         |                           |           |          |        |                           |          |          |       |                           |          |          |       |             |          |         |        |             |         |         |       |             |         |         |       |             |         |         |       |                                       |          |         |        |                           |          |         |         |                           |          |         |        |                           |          |         |        |                           |         |         |       |                           |         |         |       |                                     |          |         |        |                                     |          |         |        |                                     |          |         |        |                                     |          |         |        |                                     |          |         |        |                                                   |         |         |       |                                                   |         |         |       |                                                   |         |         |       |                                                   |         |         |       |                                                   |         |         |       |
| timepointpost:Sterne_rep1                         | -1.251575                                                                                                                                                                                                                                                                                                                                                                                                                                                                                                                                                                                                                                                                                                                                                                                                                                                                                                                                                                                                                                                                                                                                                                                                                                                                                                                                                                                                                                                                                                                                                                                                                                                                                                                                                                                                                                                                                                                                                                                                                                                                                                                                                                                                                                                                                                                                                                                                                                                                                                                                                                                                                                                                                                                                                                                                                                        | 0.063366    | -19.752      |             |            |         |             |          |          |        |               |           |          |         |                         |           |          |        |             |           |          |        |             |           |          |        |             |           |          |        |             |           |          |        |             |           |          |        |                                       |          |          |       |                           |          |          |       |                           |          |          |       |                           |           |          |        |                           |           |          |        |                           |           |          |        |                                                                                                                                                                                                                                                                                                                                                                                                                                                                                                                                                                                                                                                                                                                                                                                                                                                                                                                                                                                                                                                                                                                                                                                                                                                                                                                                                                                                                                                                                                                                                                                                                                |          |          |          |                                     |          |             |          |                                     |          |               |          |                                     |          |                         |          |                                     |          |             |           |                                                   |           |             |           |                                                   |           |             |          |                                                   |           |             |          |                                                   |           |             |          |                                                   |           |                                       |           |                                                                                                                                                                                                                                                                                                                                                                                                                                                                                                                                                                                                                                                                                                                                                                                                                                                                                                                                                                                                                                                                                                                                                                                                                                                                                                                                                                                                                                                                                                                                                                                                                                                                                                                                                                                                                                                                                                                                                                                                                                                                                                                                                                                                                                                                                                                                                                                                                                                                                                                                                                                                                                                                                                                                                                      |        |                           |           |            |         |                           |           |          |         |                           |           |          |        |                           |          |          |       |                           |          |          |       |             |          |         |        |             |         |         |       |             |         |         |       |             |         |         |       |                                       |          |         |        |                           |          |         |         |                           |          |         |        |                           |          |         |        |                           |         |         |       |                           |         |         |       |                                     |          |         |        |                                     |          |         |        |                                     |          |         |        |                                     |          |         |        |                                     |          |         |        |                                                   |         |         |       |                                                   |         |         |       |                                                   |         |         |       |                                                   |         |         |       |                                                   |         |         |       |
| timepointpost:Sterne_rep2                         | -0.695215                                                                                                                                                                                                                                                                                                                                                                                                                                                                                                                                                                                                                                                                                                                                                                                                                                                                                                                                                                                                                                                                                                                                                                                                                                                                                                                                                                                                                                                                                                                                                                                                                                                                                                                                                                                                                                                                                                                                                                                                                                                                                                                                                                                                                                                                                                                                                                                                                                                                                                                                                                                                                                                                                                                                                                                                                                        | 0.062218    | -11.174      |             |            |         |             |          |          |        |               |           |          |         |                         |           |          |        |             |           |          |        |             |           |          |        |             |           |          |        |             |           |          |        |             |           |          |        |                                       |          |          |       |                           |          |          |       |                           |          |          |       |                           |           |          |        |                           |           |          |        |                           |           |          |        |                                                                                                                                                                                                                                                                                                                                                                                                                                                                                                                                                                                                                                                                                                                                                                                                                                                                                                                                                                                                                                                                                                                                                                                                                                                                                                                                                                                                                                                                                                                                                                                                                                |          |          |          |                                     |          |             |          |                                     |          |               |          |                                     |          |                         |          |                                     |          |             |           |                                                   |           |             |           |                                                   |           |             |          |                                                   |           |             |          |                                                   |           |             |          |                                                   |           |                                       |           |                                                                                                                                                                                                                                                                                                                                                                                                                                                                                                                                                                                                                                                                                                                                                                                                                                                                                                                                                                                                                                                                                                                                                                                                                                                                                                                                                                                                                                                                                                                                                                                                                                                                                                                                                                                                                                                                                                                                                                                                                                                                                                                                                                                                                                                                                                                                                                                                                                                                                                                                                                                                                                                                                                                                                                      |        |                           |           |            |         |                           |           |          |         |                           |           |          |        |                           |          |          |       |                           |          |          |       |             |          |         |        |             |         |         |       |             |         |         |       |             |         |         |       |                                       |          |         |        |                           |          |         |         |                           |          |         |        |                           |          |         |        |                           |         |         |       |                           |         |         |       |                                     |          |         |        |                                     |          |         |        |                                     |          |         |        |                                     |          |         |        |                                     |          |         |        |                                                   |         |         |       |                                                   |         |         |       |                                                   |         |         |       |                                                   |         |         |       |                                                   |         |         |       |
| timepointpost:Sterne_rep3                         | -0.135059                                                                                                                                                                                                                                                                                                                                                                                                                                                                                                                                                                                                                                                                                                                                                                                                                                                                                                                                                                                                                                                                                                                                                                                                                                                                                                                                                                                                                                                                                                                                                                                                                                                                                                                                                                                                                                                                                                                                                                                                                                                                                                                                                                                                                                                                                                                                                                                                                                                                                                                                                                                                                                                                                                                                                                                                                                        | 0.055191    | -2.447       |             |            |         |             |          |          |        |               |           |          |         |                         |           |          |        |             |           |          |        |             |           |          |        |             |           |          |        |             |           |          |        |             |           |          |        |                                       |          |          |       |                           |          |          |       |                           |          |          |       |                           |           |          |        |                           |           |          |        |                           |           |          |        |                                                                                                                                                                                                                                                                                                                                                                                                                                                                                                                                                                                                                                                                                                                                                                                                                                                                                                                                                                                                                                                                                                                                                                                                                                                                                                                                                                                                                                                                                                                                                                                                                                |          |          |          |                                     |          |             |          |                                     |          |               |          |                                     |          |                         |          |                                     |          |             |           |                                                   |           |             |           |                                                   |           |             |          |                                                   |           |             |          |                                                   |           |             |          |                                                   |           |                                       |           |                                                                                                                                                                                                                                                                                                                                                                                                                                                                                                                                                                                                                                                                                                                                                                                                                                                                                                                                                                                                                                                                                                                                                                                                                                                                                                                                                                                                                                                                                                                                                                                                                                                                                                                                                                                                                                                                                                                                                                                                                                                                                                                                                                                                                                                                                                                                                                                                                                                                                                                                                                                                                                                                                                                                                                      |        |                           |           |            |         |                           |           |          |         |                           |           |          |        |                           |          |          |       |                           |          |          |       |             |          |         |        |             |         |         |       |             |         |         |       |             |         |         |       |                                       |          |         |        |                           |          |         |         |                           |          |         |        |                           |          |         |        |                           |         |         |       |                           |         |         |       |                                     |          |         |        |                                     |          |         |        |                                     |          |         |        |                                     |          |         |        |                                     |          |         |        |                                                   |         |         |       |                                                   |         |         |       |                                                   |         |         |       |                                                   |         |         |       |                                                   |         |         |       |
| timepointpost:Sterne_rep4                         | 0.179681                                                                                                                                                                                                                                                                                                                                                                                                                                                                                                                                                                                                                                                                                                                                                                                                                                                                                                                                                                                                                                                                                                                                                                                                                                                                                                                                                                                                                                                                                                                                                                                                                                                                                                                                                                                                                                                                                                                                                                                                                                                                                                                                                                                                                                                                                                                                                                                                                                                                                                                                                                                                                                                                                                                                                                                                                                         | 0.053613    | 3.351        |             |            |         |             |          |          |        |               |           |          |         |                         |           |          |        |             |           |          |        |             |           |          |        |             |           |          |        |             |           |          |        |             |           |          |        |                                       |          |          |       |                           |          |          |       |                           |          |          |       |                           |           |          |        |                           |           |          |        |                           |           |          |        |                                                                                                                                                                                                                                                                                                                                                                                                                                                                                                                                                                                                                                                                                                                                                                                                                                                                                                                                                                                                                                                                                                                                                                                                                                                                                                                                                                                                                                                                                                                                                                                                                                |          |          |          |                                     |          |             |          |                                     |          |               |          |                                     |          |                         |          |                                     |          |             |           |                                                   |           |             |           |                                                   |           |             |          |                                                   |           |             |          |                                                   |           |             |          |                                                   |           |                                       |           |                                                                                                                                                                                                                                                                                                                                                                                                                                                                                                                                                                                                                                                                                                                                                                                                                                                                                                                                                                                                                                                                                                                                                                                                                                                                                                                                                                                                                                                                                                                                                                                                                                                                                                                                                                                                                                                                                                                                                                                                                                                                                                                                                                                                                                                                                                                                                                                                                                                                                                                                                                                                                                                                                                                                                                      |        |                           |           |            |         |                           |           |          |         |                           |           |          |        |                           |          |          |       |                           |          |          |       |             |          |         |        |             |         |         |       |             |         |         |       |             |         |         |       |                                       |          |         |        |                           |          |         |         |                           |          |         |        |                           |          |         |        |                           |         |         |       |                           |         |         |       |                                     |          |         |        |                                     |          |         |        |                                     |          |         |        |                                     |          |         |        |                                     |          |         |        |                                                   |         |         |       |                                                   |         |         |       |                                                   |         |         |       |                                                   |         |         |       |                                                   |         |         |       |
| timepointpost:Sterne_rep5                         | 0.454303                                                                                                                                                                                                                                                                                                                                                                                                                                                                                                                                                                                                                                                                                                                                                                                                                                                                                                                                                                                                                                                                                                                                                                                                                                                                                                                                                                                                                                                                                                                                                                                                                                                                                                                                                                                                                                                                                                                                                                                                                                                                                                                                                                                                                                                                                                                                                                                                                                                                                                                                                                                                                                                                                                                                                                                                                                         | 0.053555    | 8.483        |             |            |         |             |          |          |        |               |           |          |         |                         |           |          |        |             |           |          |        |             |           |          |        |             |           |          |        |             |           |          |        |             |           |          |        |                                       |          |          |       |                           |          |          |       |                           |          |          |       |                           |           |          |        |                           |           |          |        |                           |           |          |        |                                                                                                                                                                                                                                                                                                                                                                                                                                                                                                                                                                                                                                                                                                                                                                                                                                                                                                                                                                                                                                                                                                                                                                                                                                                                                                                                                                                                                                                                                                                                                                                                                                |          |          |          |                                     |          |             |          |                                     |          |               |          |                                     |          |                         |          |                                     |          |             |           |                                                   |           |             |           |                                                   |           |             |          |                                                   |           |             |          |                                                   |           |             |          |                                                   |           |                                       |           |                                                                                                                                                                                                                                                                                                                                                                                                                                                                                                                                                                                                                                                                                                                                                                                                                                                                                                                                                                                                                                                                                                                                                                                                                                                                                                                                                                                                                                                                                                                                                                                                                                                                                                                                                                                                                                                                                                                                                                                                                                                                                                                                                                                                                                                                                                                                                                                                                                                                                                                                                                                                                                                                                                                                                                      |        |                           |           |            |         |                           |           |          |         |                           |           |          |        |                           |          |          |       |                           |          |          |       |             |          |         |        |             |         |         |       |             |         |         |       |             |         |         |       |                                       |          |         |        |                           |          |         |         |                           |          |         |        |                           |          |         |        |                           |         |         |       |                           |         |         |       |                                     |          |         |        |                                     |          |         |        |                                     |          |         |        |                                     |          |         |        |                                     |          |         |        |                                                   |         |         |       |                                                   |         |         |       |                                                   |         |         |       |                                                   |         |         |       |                                                   |         |         |       |
| triple interaction effect<br>tp*meal_cat*taste    | <p>Fixed effects:</p> <table border="1"> <thead> <tr> <th></th> <th>Estimate</th> <th>Std. Error</th> <th>t value</th> </tr> </thead> <tbody> <tr> <td>(Intercept)</td> <td>3.971202</td> <td>0.074293</td> <td>53.453</td> </tr> <tr> <td>timepointpost</td> <td>-1.827273</td> <td>0.093326</td> <td>-19.579</td> </tr> <tr> <td>meal_cat_corr_2021VEG*N</td> <td>-0.204814</td> <td>0.110620</td> <td>-1.852</td> </tr> <tr> <td>Sterne_rep1</td> <td>-0.087944</td> <td>0.091529</td> <td>-0.961</td> </tr> <tr> <td>Sterne_rep2</td> <td>-0.255536</td> <td>0.090998</td> <td>-2.808</td> </tr> <tr> <td>Sterne_rep3</td> <td>-0.313482</td> <td>0.078498</td> <td>-3.994</td> </tr> <tr> <td>Sterne_rep4</td> <td>-0.217156</td> <td>0.076043</td> <td>-2.856</td> </tr> <tr> <td>Sterne_rep5</td> <td>-0.001289</td> <td>0.075911</td> <td>-0.017</td> </tr> <tr> <td>timepointpost:meal_cat_corr_2021VEG*N</td> <td>0.324383</td> <td>0.140662</td> <td>2.306</td> </tr> <tr> <td>timepointpost:Sterne_rep1</td> <td>0.819716</td> <td>0.116346</td> <td>7.046</td> </tr> <tr> <td>timepointpost:Sterne_rep2</td> <td>0.345521</td> <td>0.115637</td> <td>2.988</td> </tr> <tr> <td>timepointpost:Sterne_rep3</td> <td>-0.004239</td> <td>0.099709</td> <td>-0.043</td> </tr> <tr> <td>timepointpost:Sterne_rep4</td> <td>-0.233999</td> <td>0.096631</td> <td>-2.422</td> </tr> <tr> <td>timepointpost:Sterne_rep5</td> <td>-0.411463</td> <td>0.096485</td> <td>-4.265</td> </tr> <tr> <td>meal_cat_corr_2021VEG*N:Sterne_rep1</td> <td>0.013247</td> <td>0.134860</td> <td>0.098</td> </tr> <tr> <td>meal_cat_corr_2021VEG*N:Sterne_rep2</td> <td>0.033552</td> <td>0.132654</td> <td>0.253</td> </tr> <tr> <td>meal_cat_corr_2021VEG*N:Sterne_rep3</td> <td>0.113656</td> <td>0.117769</td> <td>0.965</td> </tr> <tr> <td>meal_cat_corr_2021VEG*N:Sterne_rep4</td> <td>0.141104</td> <td>0.114431</td> <td>1.233</td> </tr> <tr> <td>meal_cat_corr_2021VEG*N:Sterne_rep5</td> <td>0.076491</td> <td>0.114298</td> <td>0.669</td> </tr> <tr> <td>timepointpost:meal_cat_corr_2021VEG*N:Sterne_rep1</td> <td>-0.581310</td> <td>0.171577</td> <td>-3.388</td> </tr> <tr> <td>timepointpost:meal_cat_corr_2021VEG*N:Sterne_rep2</td> <td>-0.462081</td> <td>0.168816</td> <td>-2.737</td> </tr> <tr> <td>timepointpost:meal_cat_corr_2021VEG*N:Sterne_rep3</td> <td>-0.332452</td> <td>0.149848</td> <td>-2.219</td> </tr> <tr> <td>timepointpost:meal_cat_corr_2021VEG*N:Sterne_rep4</td> <td>-0.333598</td> <td>0.145614</td> <td>-2.291</td> </tr> <tr> <td>timepointpost:meal_cat_corr_2021VEG*N:Sterne_rep5</td> <td>-0.260018</td> <td>0.145473</td> <td>-1.787</td> </tr> </tbody> </table> <p><b>post-meal*plant-based*5stars: b = -0.26, t = -1.8</b></p> <p><b>model comparison</b><br/><b>p &lt; 2.2x10<sup>-5</sup></b></p> |             |              | Estimate    | Std. Error | t value | (Intercept) | 3.971202 | 0.074293 | 53.453 | timepointpost | -1.827273 | 0.093326 | -19.579 | meal_cat_corr_2021VEG*N | -0.204814 | 0.110620 | -1.852 | Sterne_rep1 | -0.087944 | 0.091529 | -0.961 | Sterne_rep2 | -0.255536 | 0.090998 | -2.808 | Sterne_rep3 | -0.313482 | 0.078498 | -3.994 | Sterne_rep4 | -0.217156 | 0.076043 | -2.856 | Sterne_rep5 | -0.001289 | 0.075911 | -0.017 | timepointpost:meal_cat_corr_2021VEG*N | 0.324383 | 0.140662 | 2.306 | timepointpost:Sterne_rep1 | 0.819716 | 0.116346 | 7.046 | timepointpost:Sterne_rep2 | 0.345521 | 0.115637 | 2.988 | timepointpost:Sterne_rep3 | -0.004239 | 0.099709 | -0.043 | timepointpost:Sterne_rep4 | -0.233999 | 0.096631 | -2.422 | timepointpost:Sterne_rep5 | -0.411463 | 0.096485 | -4.265 | meal_cat_corr_2021VEG*N:Sterne_rep1                                                                                                                                                                                                                                                                                                                                                                                                                                                                                                                                                                                                                                                                                                                                                                                                                                                                                                                                                                                                                                                                                                                                                                                                                                                                                                                                                                                                                                                                                                                                                                                            | 0.013247 | 0.134860 | 0.098    | meal_cat_corr_2021VEG*N:Sterne_rep2 | 0.033552 | 0.132654    | 0.253    | meal_cat_corr_2021VEG*N:Sterne_rep3 | 0.113656 | 0.117769      | 0.965    | meal_cat_corr_2021VEG*N:Sterne_rep4 | 0.141104 | 0.114431                | 1.233    | meal_cat_corr_2021VEG*N:Sterne_rep5 | 0.076491 | 0.114298    | 0.669     | timepointpost:meal_cat_corr_2021VEG*N:Sterne_rep1 | -0.581310 | 0.171577    | -3.388    | timepointpost:meal_cat_corr_2021VEG*N:Sterne_rep2 | -0.462081 | 0.168816    | -2.737   | timepointpost:meal_cat_corr_2021VEG*N:Sterne_rep3 | -0.332452 | 0.149848    | -2.219   | timepointpost:meal_cat_corr_2021VEG*N:Sterne_rep4 | -0.333598 | 0.145614    | -2.291   | timepointpost:meal_cat_corr_2021VEG*N:Sterne_rep5 | -0.260018 | 0.145473                              | -1.787    | <p>Fixed effects:</p> <table border="1"> <thead> <tr> <th></th> <th>Estimate</th> <th>Std. Error</th> <th>t value</th> </tr> </thead> <tbody> <tr> <td>(Intercept)</td> <td>3.31829</td> <td>0.06417</td> <td>51.710</td> </tr> <tr> <td>timepointpost</td> <td>0.18425</td> <td>0.06933</td> <td>2.657</td> </tr> <tr> <td>meal_cat_corr_2021VEG*N</td> <td>0.15031</td> <td>0.09509</td> <td>1.581</td> </tr> <tr> <td>Sterne_rep1</td> <td>0.03156</td> <td>0.07870</td> <td>0.401</td> </tr> <tr> <td>Sterne_rep2</td> <td>-0.05081</td> <td>0.07825</td> <td>-0.649</td> </tr> <tr> <td>Sterne_rep3</td> <td>0.07212</td> <td>0.06751</td> <td>1.068</td> </tr> <tr> <td>Sterne_rep4</td> <td>0.17088</td> <td>0.06539</td> <td>2.613</td> </tr> <tr> <td>Sterne_rep5</td> <td>0.23545</td> <td>0.06527</td> <td>3.607</td> </tr> <tr> <td>timepointpost:meal_cat_corr_2021VEG*N</td> <td>-0.11059</td> <td>0.10424</td> <td>-1.061</td> </tr> <tr> <td>timepointpost:Sterne_rep1</td> <td>-1.42087</td> <td>0.08643</td> <td>-16.439</td> </tr> <tr> <td>timepointpost:Sterne_rep2</td> <td>-0.69272</td> <td>0.08579</td> <td>-8.074</td> </tr> <tr> <td>timepointpost:Sterne_rep3</td> <td>-0.19459</td> <td>0.07404</td> <td>-2.628</td> </tr> <tr> <td>timepointpost:Sterne_rep4</td> <td>0.14746</td> <td>0.07177</td> <td>2.055</td> </tr> <tr> <td>timepointpost:Sterne_rep5</td> <td>0.42873</td> <td>0.07166</td> <td>5.983</td> </tr> <tr> <td>meal_cat_corr_2021VEG*N:Sterne_rep1</td> <td>-0.07957</td> <td>0.11592</td> <td>-0.686</td> </tr> <tr> <td>meal_cat_corr_2021VEG*N:Sterne_rep2</td> <td>-0.04480</td> <td>0.11402</td> <td>-0.393</td> </tr> <tr> <td>meal_cat_corr_2021VEG*N:Sterne_rep3</td> <td>-0.12283</td> <td>0.10123</td> <td>-1.213</td> </tr> <tr> <td>meal_cat_corr_2021VEG*N:Sterne_rep4</td> <td>-0.08433</td> <td>0.09835</td> <td>-0.857</td> </tr> <tr> <td>meal_cat_corr_2021VEG*N:Sterne_rep5</td> <td>-0.11195</td> <td>0.09823</td> <td>-1.140</td> </tr> <tr> <td>timepointpost:meal_cat_corr_2021VEG*N:Sterne_rep1</td> <td>0.34844</td> <td>0.12723</td> <td>2.739</td> </tr> <tr> <td>timepointpost:meal_cat_corr_2021VEG*N:Sterne_rep2</td> <td>0.01066</td> <td>0.12502</td> <td>0.085</td> </tr> <tr> <td>timepointpost:meal_cat_corr_2021VEG*N:Sterne_rep3</td> <td>0.13271</td> <td>0.11102</td> <td>1.195</td> </tr> <tr> <td>timepointpost:meal_cat_corr_2021VEG*N:Sterne_rep4</td> <td>0.07308</td> <td>0.10790</td> <td>0.677</td> </tr> <tr> <td>timepointpost:meal_cat_corr_2021VEG*N:Sterne_rep5</td> <td>0.05756</td> <td>0.10779</td> <td>0.534</td> </tr> </tbody> </table> <p><b>post-meal*plant-based*5stars: b = 0.06, t = 0.5</b></p> <p><b>model comparison</b><br/><b>p = 0.0025</b></p> |        |                           | Estimate  | Std. Error | t value | (Intercept)               | 3.31829   | 0.06417  | 51.710  | timepointpost             | 0.18425   | 0.06933  | 2.657  | meal_cat_corr_2021VEG*N   | 0.15031  | 0.09509  | 1.581 | Sterne_rep1               | 0.03156  | 0.07870  | 0.401 | Sterne_rep2 | -0.05081 | 0.07825 | -0.649 | Sterne_rep3 | 0.07212 | 0.06751 | 1.068 | Sterne_rep4 | 0.17088 | 0.06539 | 2.613 | Sterne_rep5 | 0.23545 | 0.06527 | 3.607 | timepointpost:meal_cat_corr_2021VEG*N | -0.11059 | 0.10424 | -1.061 | timepointpost:Sterne_rep1 | -1.42087 | 0.08643 | -16.439 | timepointpost:Sterne_rep2 | -0.69272 | 0.08579 | -8.074 | timepointpost:Sterne_rep3 | -0.19459 | 0.07404 | -2.628 | timepointpost:Sterne_rep4 | 0.14746 | 0.07177 | 2.055 | timepointpost:Sterne_rep5 | 0.42873 | 0.07166 | 5.983 | meal_cat_corr_2021VEG*N:Sterne_rep1 | -0.07957 | 0.11592 | -0.686 | meal_cat_corr_2021VEG*N:Sterne_rep2 | -0.04480 | 0.11402 | -0.393 | meal_cat_corr_2021VEG*N:Sterne_rep3 | -0.12283 | 0.10123 | -1.213 | meal_cat_corr_2021VEG*N:Sterne_rep4 | -0.08433 | 0.09835 | -0.857 | meal_cat_corr_2021VEG*N:Sterne_rep5 | -0.11195 | 0.09823 | -1.140 | timepointpost:meal_cat_corr_2021VEG*N:Sterne_rep1 | 0.34844 | 0.12723 | 2.739 | timepointpost:meal_cat_corr_2021VEG*N:Sterne_rep2 | 0.01066 | 0.12502 | 0.085 | timepointpost:meal_cat_corr_2021VEG*N:Sterne_rep3 | 0.13271 | 0.11102 | 1.195 | timepointpost:meal_cat_corr_2021VEG*N:Sterne_rep4 | 0.07308 | 0.10790 | 0.677 | timepointpost:meal_cat_corr_2021VEG*N:Sterne_rep5 | 0.05756 | 0.10779 | 0.534 |
|                                                   | Estimate                                                                                                                                                                                                                                                                                                                                                                                                                                                                                                                                                                                                                                                                                                                                                                                                                                                                                                                                                                                                                                                                                                                                                                                                                                                                                                                                                                                                                                                                                                                                                                                                                                                                                                                                                                                                                                                                                                                                                                                                                                                                                                                                                                                                                                                                                                                                                                                                                                                                                                                                                                                                                                                                                                                                                                                                                                         | Std. Error  | t value      |             |            |         |             |          |          |        |               |           |          |         |                         |           |          |        |             |           |          |        |             |           |          |        |             |           |          |        |             |           |          |        |             |           |          |        |                                       |          |          |       |                           |          |          |       |                           |          |          |       |                           |           |          |        |                           |           |          |        |                           |           |          |        |                                                                                                                                                                                                                                                                                                                                                                                                                                                                                                                                                                                                                                                                                                                                                                                                                                                                                                                                                                                                                                                                                                                                                                                                                                                                                                                                                                                                                                                                                                                                                                                                                                |          |          |          |                                     |          |             |          |                                     |          |               |          |                                     |          |                         |          |                                     |          |             |           |                                                   |           |             |           |                                                   |           |             |          |                                                   |           |             |          |                                                   |           |             |          |                                                   |           |                                       |           |                                                                                                                                                                                                                                                                                                                                                                                                                                                                                                                                                                                                                                                                                                                                                                                                                                                                                                                                                                                                                                                                                                                                                                                                                                                                                                                                                                                                                                                                                                                                                                                                                                                                                                                                                                                                                                                                                                                                                                                                                                                                                                                                                                                                                                                                                                                                                                                                                                                                                                                                                                                                                                                                                                                                                                      |        |                           |           |            |         |                           |           |          |         |                           |           |          |        |                           |          |          |       |                           |          |          |       |             |          |         |        |             |         |         |       |             |         |         |       |             |         |         |       |                                       |          |         |        |                           |          |         |         |                           |          |         |        |                           |          |         |        |                           |         |         |       |                           |         |         |       |                                     |          |         |        |                                     |          |         |        |                                     |          |         |        |                                     |          |         |        |                                     |          |         |        |                                                   |         |         |       |                                                   |         |         |       |                                                   |         |         |       |                                                   |         |         |       |                                                   |         |         |       |
| (Intercept)                                       | 3.971202                                                                                                                                                                                                                                                                                                                                                                                                                                                                                                                                                                                                                                                                                                                                                                                                                                                                                                                                                                                                                                                                                                                                                                                                                                                                                                                                                                                                                                                                                                                                                                                                                                                                                                                                                                                                                                                                                                                                                                                                                                                                                                                                                                                                                                                                                                                                                                                                                                                                                                                                                                                                                                                                                                                                                                                                                                         | 0.074293    | 53.453       |             |            |         |             |          |          |        |               |           |          |         |                         |           |          |        |             |           |          |        |             |           |          |        |             |           |          |        |             |           |          |        |             |           |          |        |                                       |          |          |       |                           |          |          |       |                           |          |          |       |                           |           |          |        |                           |           |          |        |                           |           |          |        |                                                                                                                                                                                                                                                                                                                                                                                                                                                                                                                                                                                                                                                                                                                                                                                                                                                                                                                                                                                                                                                                                                                                                                                                                                                                                                                                                                                                                                                                                                                                                                                                                                |          |          |          |                                     |          |             |          |                                     |          |               |          |                                     |          |                         |          |                                     |          |             |           |                                                   |           |             |           |                                                   |           |             |          |                                                   |           |             |          |                                                   |           |             |          |                                                   |           |                                       |           |                                                                                                                                                                                                                                                                                                                                                                                                                                                                                                                                                                                                                                                                                                                                                                                                                                                                                                                                                                                                                                                                                                                                                                                                                                                                                                                                                                                                                                                                                                                                                                                                                                                                                                                                                                                                                                                                                                                                                                                                                                                                                                                                                                                                                                                                                                                                                                                                                                                                                                                                                                                                                                                                                                                                                                      |        |                           |           |            |         |                           |           |          |         |                           |           |          |        |                           |          |          |       |                           |          |          |       |             |          |         |        |             |         |         |       |             |         |         |       |             |         |         |       |                                       |          |         |        |                           |          |         |         |                           |          |         |        |                           |          |         |        |                           |         |         |       |                           |         |         |       |                                     |          |         |        |                                     |          |         |        |                                     |          |         |        |                                     |          |         |        |                                     |          |         |        |                                                   |         |         |       |                                                   |         |         |       |                                                   |         |         |       |                                                   |         |         |       |                                                   |         |         |       |
| timepointpost                                     | -1.827273                                                                                                                                                                                                                                                                                                                                                                                                                                                                                                                                                                                                                                                                                                                                                                                                                                                                                                                                                                                                                                                                                                                                                                                                                                                                                                                                                                                                                                                                                                                                                                                                                                                                                                                                                                                                                                                                                                                                                                                                                                                                                                                                                                                                                                                                                                                                                                                                                                                                                                                                                                                                                                                                                                                                                                                                                                        | 0.093326    | -19.579      |             |            |         |             |          |          |        |               |           |          |         |                         |           |          |        |             |           |          |        |             |           |          |        |             |           |          |        |             |           |          |        |             |           |          |        |                                       |          |          |       |                           |          |          |       |                           |          |          |       |                           |           |          |        |                           |           |          |        |                           |           |          |        |                                                                                                                                                                                                                                                                                                                                                                                                                                                                                                                                                                                                                                                                                                                                                                                                                                                                                                                                                                                                                                                                                                                                                                                                                                                                                                                                                                                                                                                                                                                                                                                                                                |          |          |          |                                     |          |             |          |                                     |          |               |          |                                     |          |                         |          |                                     |          |             |           |                                                   |           |             |           |                                                   |           |             |          |                                                   |           |             |          |                                                   |           |             |          |                                                   |           |                                       |           |                                                                                                                                                                                                                                                                                                                                                                                                                                                                                                                                                                                                                                                                                                                                                                                                                                                                                                                                                                                                                                                                                                                                                                                                                                                                                                                                                                                                                                                                                                                                                                                                                                                                                                                                                                                                                                                                                                                                                                                                                                                                                                                                                                                                                                                                                                                                                                                                                                                                                                                                                                                                                                                                                                                                                                      |        |                           |           |            |         |                           |           |          |         |                           |           |          |        |                           |          |          |       |                           |          |          |       |             |          |         |        |             |         |         |       |             |         |         |       |             |         |         |       |                                       |          |         |        |                           |          |         |         |                           |          |         |        |                           |          |         |        |                           |         |         |       |                           |         |         |       |                                     |          |         |        |                                     |          |         |        |                                     |          |         |        |                                     |          |         |        |                                     |          |         |        |                                                   |         |         |       |                                                   |         |         |       |                                                   |         |         |       |                                                   |         |         |       |                                                   |         |         |       |
| meal_cat_corr_2021VEG*N                           | -0.204814                                                                                                                                                                                                                                                                                                                                                                                                                                                                                                                                                                                                                                                                                                                                                                                                                                                                                                                                                                                                                                                                                                                                                                                                                                                                                                                                                                                                                                                                                                                                                                                                                                                                                                                                                                                                                                                                                                                                                                                                                                                                                                                                                                                                                                                                                                                                                                                                                                                                                                                                                                                                                                                                                                                                                                                                                                        | 0.110620    | -1.852       |             |            |         |             |          |          |        |               |           |          |         |                         |           |          |        |             |           |          |        |             |           |          |        |             |           |          |        |             |           |          |        |             |           |          |        |                                       |          |          |       |                           |          |          |       |                           |          |          |       |                           |           |          |        |                           |           |          |        |                           |           |          |        |                                                                                                                                                                                                                                                                                                                                                                                                                                                                                                                                                                                                                                                                                                                                                                                                                                                                                                                                                                                                                                                                                                                                                                                                                                                                                                                                                                                                                                                                                                                                                                                                                                |          |          |          |                                     |          |             |          |                                     |          |               |          |                                     |          |                         |          |                                     |          |             |           |                                                   |           |             |           |                                                   |           |             |          |                                                   |           |             |          |                                                   |           |             |          |                                                   |           |                                       |           |                                                                                                                                                                                                                                                                                                                                                                                                                                                                                                                                                                                                                                                                                                                                                                                                                                                                                                                                                                                                                                                                                                                                                                                                                                                                                                                                                                                                                                                                                                                                                                                                                                                                                                                                                                                                                                                                                                                                                                                                                                                                                                                                                                                                                                                                                                                                                                                                                                                                                                                                                                                                                                                                                                                                                                      |        |                           |           |            |         |                           |           |          |         |                           |           |          |        |                           |          |          |       |                           |          |          |       |             |          |         |        |             |         |         |       |             |         |         |       |             |         |         |       |                                       |          |         |        |                           |          |         |         |                           |          |         |        |                           |          |         |        |                           |         |         |       |                           |         |         |       |                                     |          |         |        |                                     |          |         |        |                                     |          |         |        |                                     |          |         |        |                                     |          |         |        |                                                   |         |         |       |                                                   |         |         |       |                                                   |         |         |       |                                                   |         |         |       |                                                   |         |         |       |
| Sterne_rep1                                       | -0.087944                                                                                                                                                                                                                                                                                                                                                                                                                                                                                                                                                                                                                                                                                                                                                                                                                                                                                                                                                                                                                                                                                                                                                                                                                                                                                                                                                                                                                                                                                                                                                                                                                                                                                                                                                                                                                                                                                                                                                                                                                                                                                                                                                                                                                                                                                                                                                                                                                                                                                                                                                                                                                                                                                                                                                                                                                                        | 0.091529    | -0.961       |             |            |         |             |          |          |        |               |           |          |         |                         |           |          |        |             |           |          |        |             |           |          |        |             |           |          |        |             |           |          |        |             |           |          |        |                                       |          |          |       |                           |          |          |       |                           |          |          |       |                           |           |          |        |                           |           |          |        |                           |           |          |        |                                                                                                                                                                                                                                                                                                                                                                                                                                                                                                                                                                                                                                                                                                                                                                                                                                                                                                                                                                                                                                                                                                                                                                                                                                                                                                                                                                                                                                                                                                                                                                                                                                |          |          |          |                                     |          |             |          |                                     |          |               |          |                                     |          |                         |          |                                     |          |             |           |                                                   |           |             |           |                                                   |           |             |          |                                                   |           |             |          |                                                   |           |             |          |                                                   |           |                                       |           |                                                                                                                                                                                                                                                                                                                                                                                                                                                                                                                                                                                                                                                                                                                                                                                                                                                                                                                                                                                                                                                                                                                                                                                                                                                                                                                                                                                                                                                                                                                                                                                                                                                                                                                                                                                                                                                                                                                                                                                                                                                                                                                                                                                                                                                                                                                                                                                                                                                                                                                                                                                                                                                                                                                                                                      |        |                           |           |            |         |                           |           |          |         |                           |           |          |        |                           |          |          |       |                           |          |          |       |             |          |         |        |             |         |         |       |             |         |         |       |             |         |         |       |                                       |          |         |        |                           |          |         |         |                           |          |         |        |                           |          |         |        |                           |         |         |       |                           |         |         |       |                                     |          |         |        |                                     |          |         |        |                                     |          |         |        |                                     |          |         |        |                                     |          |         |        |                                                   |         |         |       |                                                   |         |         |       |                                                   |         |         |       |                                                   |         |         |       |                                                   |         |         |       |
| Sterne_rep2                                       | -0.255536                                                                                                                                                                                                                                                                                                                                                                                                                                                                                                                                                                                                                                                                                                                                                                                                                                                                                                                                                                                                                                                                                                                                                                                                                                                                                                                                                                                                                                                                                                                                                                                                                                                                                                                                                                                                                                                                                                                                                                                                                                                                                                                                                                                                                                                                                                                                                                                                                                                                                                                                                                                                                                                                                                                                                                                                                                        | 0.090998    | -2.808       |             |            |         |             |          |          |        |               |           |          |         |                         |           |          |        |             |           |          |        |             |           |          |        |             |           |          |        |             |           |          |        |             |           |          |        |                                       |          |          |       |                           |          |          |       |                           |          |          |       |                           |           |          |        |                           |           |          |        |                           |           |          |        |                                                                                                                                                                                                                                                                                                                                                                                                                                                                                                                                                                                                                                                                                                                                                                                                                                                                                                                                                                                                                                                                                                                                                                                                                                                                                                                                                                                                                                                                                                                                                                                                                                |          |          |          |                                     |          |             |          |                                     |          |               |          |                                     |          |                         |          |                                     |          |             |           |                                                   |           |             |           |                                                   |           |             |          |                                                   |           |             |          |                                                   |           |             |          |                                                   |           |                                       |           |                                                                                                                                                                                                                                                                                                                                                                                                                                                                                                                                                                                                                                                                                                                                                                                                                                                                                                                                                                                                                                                                                                                                                                                                                                                                                                                                                                                                                                                                                                                                                                                                                                                                                                                                                                                                                                                                                                                                                                                                                                                                                                                                                                                                                                                                                                                                                                                                                                                                                                                                                                                                                                                                                                                                                                      |        |                           |           |            |         |                           |           |          |         |                           |           |          |        |                           |          |          |       |                           |          |          |       |             |          |         |        |             |         |         |       |             |         |         |       |             |         |         |       |                                       |          |         |        |                           |          |         |         |                           |          |         |        |                           |          |         |        |                           |         |         |       |                           |         |         |       |                                     |          |         |        |                                     |          |         |        |                                     |          |         |        |                                     |          |         |        |                                     |          |         |        |                                                   |         |         |       |                                                   |         |         |       |                                                   |         |         |       |                                                   |         |         |       |                                                   |         |         |       |
| Sterne_rep3                                       | -0.313482                                                                                                                                                                                                                                                                                                                                                                                                                                                                                                                                                                                                                                                                                                                                                                                                                                                                                                                                                                                                                                                                                                                                                                                                                                                                                                                                                                                                                                                                                                                                                                                                                                                                                                                                                                                                                                                                                                                                                                                                                                                                                                                                                                                                                                                                                                                                                                                                                                                                                                                                                                                                                                                                                                                                                                                                                                        | 0.078498    | -3.994       |             |            |         |             |          |          |        |               |           |          |         |                         |           |          |        |             |           |          |        |             |           |          |        |             |           |          |        |             |           |          |        |             |           |          |        |                                       |          |          |       |                           |          |          |       |                           |          |          |       |                           |           |          |        |                           |           |          |        |                           |           |          |        |                                                                                                                                                                                                                                                                                                                                                                                                                                                                                                                                                                                                                                                                                                                                                                                                                                                                                                                                                                                                                                                                                                                                                                                                                                                                                                                                                                                                                                                                                                                                                                                                                                |          |          |          |                                     |          |             |          |                                     |          |               |          |                                     |          |                         |          |                                     |          |             |           |                                                   |           |             |           |                                                   |           |             |          |                                                   |           |             |          |                                                   |           |             |          |                                                   |           |                                       |           |                                                                                                                                                                                                                                                                                                                                                                                                                                                                                                                                                                                                                                                                                                                                                                                                                                                                                                                                                                                                                                                                                                                                                                                                                                                                                                                                                                                                                                                                                                                                                                                                                                                                                                                                                                                                                                                                                                                                                                                                                                                                                                                                                                                                                                                                                                                                                                                                                                                                                                                                                                                                                                                                                                                                                                      |        |                           |           |            |         |                           |           |          |         |                           |           |          |        |                           |          |          |       |                           |          |          |       |             |          |         |        |             |         |         |       |             |         |         |       |             |         |         |       |                                       |          |         |        |                           |          |         |         |                           |          |         |        |                           |          |         |        |                           |         |         |       |                           |         |         |       |                                     |          |         |        |                                     |          |         |        |                                     |          |         |        |                                     |          |         |        |                                     |          |         |        |                                                   |         |         |       |                                                   |         |         |       |                                                   |         |         |       |                                                   |         |         |       |                                                   |         |         |       |
| Sterne_rep4                                       | -0.217156                                                                                                                                                                                                                                                                                                                                                                                                                                                                                                                                                                                                                                                                                                                                                                                                                                                                                                                                                                                                                                                                                                                                                                                                                                                                                                                                                                                                                                                                                                                                                                                                                                                                                                                                                                                                                                                                                                                                                                                                                                                                                                                                                                                                                                                                                                                                                                                                                                                                                                                                                                                                                                                                                                                                                                                                                                        | 0.076043    | -2.856       |             |            |         |             |          |          |        |               |           |          |         |                         |           |          |        |             |           |          |        |             |           |          |        |             |           |          |        |             |           |          |        |             |           |          |        |                                       |          |          |       |                           |          |          |       |                           |          |          |       |                           |           |          |        |                           |           |          |        |                           |           |          |        |                                                                                                                                                                                                                                                                                                                                                                                                                                                                                                                                                                                                                                                                                                                                                                                                                                                                                                                                                                                                                                                                                                                                                                                                                                                                                                                                                                                                                                                                                                                                                                                                                                |          |          |          |                                     |          |             |          |                                     |          |               |          |                                     |          |                         |          |                                     |          |             |           |                                                   |           |             |           |                                                   |           |             |          |                                                   |           |             |          |                                                   |           |             |          |                                                   |           |                                       |           |                                                                                                                                                                                                                                                                                                                                                                                                                                                                                                                                                                                                                                                                                                                                                                                                                                                                                                                                                                                                                                                                                                                                                                                                                                                                                                                                                                                                                                                                                                                                                                                                                                                                                                                                                                                                                                                                                                                                                                                                                                                                                                                                                                                                                                                                                                                                                                                                                                                                                                                                                                                                                                                                                                                                                                      |        |                           |           |            |         |                           |           |          |         |                           |           |          |        |                           |          |          |       |                           |          |          |       |             |          |         |        |             |         |         |       |             |         |         |       |             |         |         |       |                                       |          |         |        |                           |          |         |         |                           |          |         |        |                           |          |         |        |                           |         |         |       |                           |         |         |       |                                     |          |         |        |                                     |          |         |        |                                     |          |         |        |                                     |          |         |        |                                     |          |         |        |                                                   |         |         |       |                                                   |         |         |       |                                                   |         |         |       |                                                   |         |         |       |                                                   |         |         |       |
| Sterne_rep5                                       | -0.001289                                                                                                                                                                                                                                                                                                                                                                                                                                                                                                                                                                                                                                                                                                                                                                                                                                                                                                                                                                                                                                                                                                                                                                                                                                                                                                                                                                                                                                                                                                                                                                                                                                                                                                                                                                                                                                                                                                                                                                                                                                                                                                                                                                                                                                                                                                                                                                                                                                                                                                                                                                                                                                                                                                                                                                                                                                        | 0.075911    | -0.017       |             |            |         |             |          |          |        |               |           |          |         |                         |           |          |        |             |           |          |        |             |           |          |        |             |           |          |        |             |           |          |        |             |           |          |        |                                       |          |          |       |                           |          |          |       |                           |          |          |       |                           |           |          |        |                           |           |          |        |                           |           |          |        |                                                                                                                                                                                                                                                                                                                                                                                                                                                                                                                                                                                                                                                                                                                                                                                                                                                                                                                                                                                                                                                                                                                                                                                                                                                                                                                                                                                                                                                                                                                                                                                                                                |          |          |          |                                     |          |             |          |                                     |          |               |          |                                     |          |                         |          |                                     |          |             |           |                                                   |           |             |           |                                                   |           |             |          |                                                   |           |             |          |                                                   |           |             |          |                                                   |           |                                       |           |                                                                                                                                                                                                                                                                                                                                                                                                                                                                                                                                                                                                                                                                                                                                                                                                                                                                                                                                                                                                                                                                                                                                                                                                                                                                                                                                                                                                                                                                                                                                                                                                                                                                                                                                                                                                                                                                                                                                                                                                                                                                                                                                                                                                                                                                                                                                                                                                                                                                                                                                                                                                                                                                                                                                                                      |        |                           |           |            |         |                           |           |          |         |                           |           |          |        |                           |          |          |       |                           |          |          |       |             |          |         |        |             |         |         |       |             |         |         |       |             |         |         |       |                                       |          |         |        |                           |          |         |         |                           |          |         |        |                           |          |         |        |                           |         |         |       |                           |         |         |       |                                     |          |         |        |                                     |          |         |        |                                     |          |         |        |                                     |          |         |        |                                     |          |         |        |                                                   |         |         |       |                                                   |         |         |       |                                                   |         |         |       |                                                   |         |         |       |                                                   |         |         |       |
| timepointpost:meal_cat_corr_2021VEG*N             | 0.324383                                                                                                                                                                                                                                                                                                                                                                                                                                                                                                                                                                                                                                                                                                                                                                                                                                                                                                                                                                                                                                                                                                                                                                                                                                                                                                                                                                                                                                                                                                                                                                                                                                                                                                                                                                                                                                                                                                                                                                                                                                                                                                                                                                                                                                                                                                                                                                                                                                                                                                                                                                                                                                                                                                                                                                                                                                         | 0.140662    | 2.306        |             |            |         |             |          |          |        |               |           |          |         |                         |           |          |        |             |           |          |        |             |           |          |        |             |           |          |        |             |           |          |        |             |           |          |        |                                       |          |          |       |                           |          |          |       |                           |          |          |       |                           |           |          |        |                           |           |          |        |                           |           |          |        |                                                                                                                                                                                                                                                                                                                                                                                                                                                                                                                                                                                                                                                                                                                                                                                                                                                                                                                                                                                                                                                                                                                                                                                                                                                                                                                                                                                                                                                                                                                                                                                                                                |          |          |          |                                     |          |             |          |                                     |          |               |          |                                     |          |                         |          |                                     |          |             |           |                                                   |           |             |           |                                                   |           |             |          |                                                   |           |             |          |                                                   |           |             |          |                                                   |           |                                       |           |                                                                                                                                                                                                                                                                                                                                                                                                                                                                                                                                                                                                                                                                                                                                                                                                                                                                                                                                                                                                                                                                                                                                                                                                                                                                                                                                                                                                                                                                                                                                                                                                                                                                                                                                                                                                                                                                                                                                                                                                                                                                                                                                                                                                                                                                                                                                                                                                                                                                                                                                                                                                                                                                                                                                                                      |        |                           |           |            |         |                           |           |          |         |                           |           |          |        |                           |          |          |       |                           |          |          |       |             |          |         |        |             |         |         |       |             |         |         |       |             |         |         |       |                                       |          |         |        |                           |          |         |         |                           |          |         |        |                           |          |         |        |                           |         |         |       |                           |         |         |       |                                     |          |         |        |                                     |          |         |        |                                     |          |         |        |                                     |          |         |        |                                     |          |         |        |                                                   |         |         |       |                                                   |         |         |       |                                                   |         |         |       |                                                   |         |         |       |                                                   |         |         |       |
| timepointpost:Sterne_rep1                         | 0.819716                                                                                                                                                                                                                                                                                                                                                                                                                                                                                                                                                                                                                                                                                                                                                                                                                                                                                                                                                                                                                                                                                                                                                                                                                                                                                                                                                                                                                                                                                                                                                                                                                                                                                                                                                                                                                                                                                                                                                                                                                                                                                                                                                                                                                                                                                                                                                                                                                                                                                                                                                                                                                                                                                                                                                                                                                                         | 0.116346    | 7.046        |             |            |         |             |          |          |        |               |           |          |         |                         |           |          |        |             |           |          |        |             |           |          |        |             |           |          |        |             |           |          |        |             |           |          |        |                                       |          |          |       |                           |          |          |       |                           |          |          |       |                           |           |          |        |                           |           |          |        |                           |           |          |        |                                                                                                                                                                                                                                                                                                                                                                                                                                                                                                                                                                                                                                                                                                                                                                                                                                                                                                                                                                                                                                                                                                                                                                                                                                                                                                                                                                                                                                                                                                                                                                                                                                |          |          |          |                                     |          |             |          |                                     |          |               |          |                                     |          |                         |          |                                     |          |             |           |                                                   |           |             |           |                                                   |           |             |          |                                                   |           |             |          |                                                   |           |             |          |                                                   |           |                                       |           |                                                                                                                                                                                                                                                                                                                                                                                                                                                                                                                                                                                                                                                                                                                                                                                                                                                                                                                                                                                                                                                                                                                                                                                                                                                                                                                                                                                                                                                                                                                                                                                                                                                                                                                                                                                                                                                                                                                                                                                                                                                                                                                                                                                                                                                                                                                                                                                                                                                                                                                                                                                                                                                                                                                                                                      |        |                           |           |            |         |                           |           |          |         |                           |           |          |        |                           |          |          |       |                           |          |          |       |             |          |         |        |             |         |         |       |             |         |         |       |             |         |         |       |                                       |          |         |        |                           |          |         |         |                           |          |         |        |                           |          |         |        |                           |         |         |       |                           |         |         |       |                                     |          |         |        |                                     |          |         |        |                                     |          |         |        |                                     |          |         |        |                                     |          |         |        |                                                   |         |         |       |                                                   |         |         |       |                                                   |         |         |       |                                                   |         |         |       |                                                   |         |         |       |
| timepointpost:Sterne_rep2                         | 0.345521                                                                                                                                                                                                                                                                                                                                                                                                                                                                                                                                                                                                                                                                                                                                                                                                                                                                                                                                                                                                                                                                                                                                                                                                                                                                                                                                                                                                                                                                                                                                                                                                                                                                                                                                                                                                                                                                                                                                                                                                                                                                                                                                                                                                                                                                                                                                                                                                                                                                                                                                                                                                                                                                                                                                                                                                                                         | 0.115637    | 2.988        |             |            |         |             |          |          |        |               |           |          |         |                         |           |          |        |             |           |          |        |             |           |          |        |             |           |          |        |             |           |          |        |             |           |          |        |                                       |          |          |       |                           |          |          |       |                           |          |          |       |                           |           |          |        |                           |           |          |        |                           |           |          |        |                                                                                                                                                                                                                                                                                                                                                                                                                                                                                                                                                                                                                                                                                                                                                                                                                                                                                                                                                                                                                                                                                                                                                                                                                                                                                                                                                                                                                                                                                                                                                                                                                                |          |          |          |                                     |          |             |          |                                     |          |               |          |                                     |          |                         |          |                                     |          |             |           |                                                   |           |             |           |                                                   |           |             |          |                                                   |           |             |          |                                                   |           |             |          |                                                   |           |                                       |           |                                                                                                                                                                                                                                                                                                                                                                                                                                                                                                                                                                                                                                                                                                                                                                                                                                                                                                                                                                                                                                                                                                                                                                                                                                                                                                                                                                                                                                                                                                                                                                                                                                                                                                                                                                                                                                                                                                                                                                                                                                                                                                                                                                                                                                                                                                                                                                                                                                                                                                                                                                                                                                                                                                                                                                      |        |                           |           |            |         |                           |           |          |         |                           |           |          |        |                           |          |          |       |                           |          |          |       |             |          |         |        |             |         |         |       |             |         |         |       |             |         |         |       |                                       |          |         |        |                           |          |         |         |                           |          |         |        |                           |          |         |        |                           |         |         |       |                           |         |         |       |                                     |          |         |        |                                     |          |         |        |                                     |          |         |        |                                     |          |         |        |                                     |          |         |        |                                                   |         |         |       |                                                   |         |         |       |                                                   |         |         |       |                                                   |         |         |       |                                                   |         |         |       |
| timepointpost:Sterne_rep3                         | -0.004239                                                                                                                                                                                                                                                                                                                                                                                                                                                                                                                                                                                                                                                                                                                                                                                                                                                                                                                                                                                                                                                                                                                                                                                                                                                                                                                                                                                                                                                                                                                                                                                                                                                                                                                                                                                                                                                                                                                                                                                                                                                                                                                                                                                                                                                                                                                                                                                                                                                                                                                                                                                                                                                                                                                                                                                                                                        | 0.099709    | -0.043       |             |            |         |             |          |          |        |               |           |          |         |                         |           |          |        |             |           |          |        |             |           |          |        |             |           |          |        |             |           |          |        |             |           |          |        |                                       |          |          |       |                           |          |          |       |                           |          |          |       |                           |           |          |        |                           |           |          |        |                           |           |          |        |                                                                                                                                                                                                                                                                                                                                                                                                                                                                                                                                                                                                                                                                                                                                                                                                                                                                                                                                                                                                                                                                                                                                                                                                                                                                                                                                                                                                                                                                                                                                                                                                                                |          |          |          |                                     |          |             |          |                                     |          |               |          |                                     |          |                         |          |                                     |          |             |           |                                                   |           |             |           |                                                   |           |             |          |                                                   |           |             |          |                                                   |           |             |          |                                                   |           |                                       |           |                                                                                                                                                                                                                                                                                                                                                                                                                                                                                                                                                                                                                                                                                                                                                                                                                                                                                                                                                                                                                                                                                                                                                                                                                                                                                                                                                                                                                                                                                                                                                                                                                                                                                                                                                                                                                                                                                                                                                                                                                                                                                                                                                                                                                                                                                                                                                                                                                                                                                                                                                                                                                                                                                                                                                                      |        |                           |           |            |         |                           |           |          |         |                           |           |          |        |                           |          |          |       |                           |          |          |       |             |          |         |        |             |         |         |       |             |         |         |       |             |         |         |       |                                       |          |         |        |                           |          |         |         |                           |          |         |        |                           |          |         |        |                           |         |         |       |                           |         |         |       |                                     |          |         |        |                                     |          |         |        |                                     |          |         |        |                                     |          |         |        |                                     |          |         |        |                                                   |         |         |       |                                                   |         |         |       |                                                   |         |         |       |                                                   |         |         |       |                                                   |         |         |       |
| timepointpost:Sterne_rep4                         | -0.233999                                                                                                                                                                                                                                                                                                                                                                                                                                                                                                                                                                                                                                                                                                                                                                                                                                                                                                                                                                                                                                                                                                                                                                                                                                                                                                                                                                                                                                                                                                                                                                                                                                                                                                                                                                                                                                                                                                                                                                                                                                                                                                                                                                                                                                                                                                                                                                                                                                                                                                                                                                                                                                                                                                                                                                                                                                        | 0.096631    | -2.422       |             |            |         |             |          |          |        |               |           |          |         |                         |           |          |        |             |           |          |        |             |           |          |        |             |           |          |        |             |           |          |        |             |           |          |        |                                       |          |          |       |                           |          |          |       |                           |          |          |       |                           |           |          |        |                           |           |          |        |                           |           |          |        |                                                                                                                                                                                                                                                                                                                                                                                                                                                                                                                                                                                                                                                                                                                                                                                                                                                                                                                                                                                                                                                                                                                                                                                                                                                                                                                                                                                                                                                                                                                                                                                                                                |          |          |          |                                     |          |             |          |                                     |          |               |          |                                     |          |                         |          |                                     |          |             |           |                                                   |           |             |           |                                                   |           |             |          |                                                   |           |             |          |                                                   |           |             |          |                                                   |           |                                       |           |                                                                                                                                                                                                                                                                                                                                                                                                                                                                                                                                                                                                                                                                                                                                                                                                                                                                                                                                                                                                                                                                                                                                                                                                                                                                                                                                                                                                                                                                                                                                                                                                                                                                                                                                                                                                                                                                                                                                                                                                                                                                                                                                                                                                                                                                                                                                                                                                                                                                                                                                                                                                                                                                                                                                                                      |        |                           |           |            |         |                           |           |          |         |                           |           |          |        |                           |          |          |       |                           |          |          |       |             |          |         |        |             |         |         |       |             |         |         |       |             |         |         |       |                                       |          |         |        |                           |          |         |         |                           |          |         |        |                           |          |         |        |                           |         |         |       |                           |         |         |       |                                     |          |         |        |                                     |          |         |        |                                     |          |         |        |                                     |          |         |        |                                     |          |         |        |                                                   |         |         |       |                                                   |         |         |       |                                                   |         |         |       |                                                   |         |         |       |                                                   |         |         |       |
| timepointpost:Sterne_rep5                         | -0.411463                                                                                                                                                                                                                                                                                                                                                                                                                                                                                                                                                                                                                                                                                                                                                                                                                                                                                                                                                                                                                                                                                                                                                                                                                                                                                                                                                                                                                                                                                                                                                                                                                                                                                                                                                                                                                                                                                                                                                                                                                                                                                                                                                                                                                                                                                                                                                                                                                                                                                                                                                                                                                                                                                                                                                                                                                                        | 0.096485    | -4.265       |             |            |         |             |          |          |        |               |           |          |         |                         |           |          |        |             |           |          |        |             |           |          |        |             |           |          |        |             |           |          |        |             |           |          |        |                                       |          |          |       |                           |          |          |       |                           |          |          |       |                           |           |          |        |                           |           |          |        |                           |           |          |        |                                                                                                                                                                                                                                                                                                                                                                                                                                                                                                                                                                                                                                                                                                                                                                                                                                                                                                                                                                                                                                                                                                                                                                                                                                                                                                                                                                                                                                                                                                                                                                                                                                |          |          |          |                                     |          |             |          |                                     |          |               |          |                                     |          |                         |          |                                     |          |             |           |                                                   |           |             |           |                                                   |           |             |          |                                                   |           |             |          |                                                   |           |             |          |                                                   |           |                                       |           |                                                                                                                                                                                                                                                                                                                                                                                                                                                                                                                                                                                                                                                                                                                                                                                                                                                                                                                                                                                                                                                                                                                                                                                                                                                                                                                                                                                                                                                                                                                                                                                                                                                                                                                                                                                                                                                                                                                                                                                                                                                                                                                                                                                                                                                                                                                                                                                                                                                                                                                                                                                                                                                                                                                                                                      |        |                           |           |            |         |                           |           |          |         |                           |           |          |        |                           |          |          |       |                           |          |          |       |             |          |         |        |             |         |         |       |             |         |         |       |             |         |         |       |                                       |          |         |        |                           |          |         |         |                           |          |         |        |                           |          |         |        |                           |         |         |       |                           |         |         |       |                                     |          |         |        |                                     |          |         |        |                                     |          |         |        |                                     |          |         |        |                                     |          |         |        |                                                   |         |         |       |                                                   |         |         |       |                                                   |         |         |       |                                                   |         |         |       |                                                   |         |         |       |
| meal_cat_corr_2021VEG*N:Sterne_rep1               | 0.013247                                                                                                                                                                                                                                                                                                                                                                                                                                                                                                                                                                                                                                                                                                                                                                                                                                                                                                                                                                                                                                                                                                                                                                                                                                                                                                                                                                                                                                                                                                                                                                                                                                                                                                                                                                                                                                                                                                                                                                                                                                                                                                                                                                                                                                                                                                                                                                                                                                                                                                                                                                                                                                                                                                                                                                                                                                         | 0.134860    | 0.098        |             |            |         |             |          |          |        |               |           |          |         |                         |           |          |        |             |           |          |        |             |           |          |        |             |           |          |        |             |           |          |        |             |           |          |        |                                       |          |          |       |                           |          |          |       |                           |          |          |       |                           |           |          |        |                           |           |          |        |                           |           |          |        |                                                                                                                                                                                                                                                                                                                                                                                                                                                                                                                                                                                                                                                                                                                                                                                                                                                                                                                                                                                                                                                                                                                                                                                                                                                                                                                                                                                                                                                                                                                                                                                                                                |          |          |          |                                     |          |             |          |                                     |          |               |          |                                     |          |                         |          |                                     |          |             |           |                                                   |           |             |           |                                                   |           |             |          |                                                   |           |             |          |                                                   |           |             |          |                                                   |           |                                       |           |                                                                                                                                                                                                                                                                                                                                                                                                                                                                                                                                                                                                                                                                                                                                                                                                                                                                                                                                                                                                                                                                                                                                                                                                                                                                                                                                                                                                                                                                                                                                                                                                                                                                                                                                                                                                                                                                                                                                                                                                                                                                                                                                                                                                                                                                                                                                                                                                                                                                                                                                                                                                                                                                                                                                                                      |        |                           |           |            |         |                           |           |          |         |                           |           |          |        |                           |          |          |       |                           |          |          |       |             |          |         |        |             |         |         |       |             |         |         |       |             |         |         |       |                                       |          |         |        |                           |          |         |         |                           |          |         |        |                           |          |         |        |                           |         |         |       |                           |         |         |       |                                     |          |         |        |                                     |          |         |        |                                     |          |         |        |                                     |          |         |        |                                     |          |         |        |                                                   |         |         |       |                                                   |         |         |       |                                                   |         |         |       |                                                   |         |         |       |                                                   |         |         |       |
| meal_cat_corr_2021VEG*N:Sterne_rep2               | 0.033552                                                                                                                                                                                                                                                                                                                                                                                                                                                                                                                                                                                                                                                                                                                                                                                                                                                                                                                                                                                                                                                                                                                                                                                                                                                                                                                                                                                                                                                                                                                                                                                                                                                                                                                                                                                                                                                                                                                                                                                                                                                                                                                                                                                                                                                                                                                                                                                                                                                                                                                                                                                                                                                                                                                                                                                                                                         | 0.132654    | 0.253        |             |            |         |             |          |          |        |               |           |          |         |                         |           |          |        |             |           |          |        |             |           |          |        |             |           |          |        |             |           |          |        |             |           |          |        |                                       |          |          |       |                           |          |          |       |                           |          |          |       |                           |           |          |        |                           |           |          |        |                           |           |          |        |                                                                                                                                                                                                                                                                                                                                                                                                                                                                                                                                                                                                                                                                                                                                                                                                                                                                                                                                                                                                                                                                                                                                                                                                                                                                                                                                                                                                                                                                                                                                                                                                                                |          |          |          |                                     |          |             |          |                                     |          |               |          |                                     |          |                         |          |                                     |          |             |           |                                                   |           |             |           |                                                   |           |             |          |                                                   |           |             |          |                                                   |           |             |          |                                                   |           |                                       |           |                                                                                                                                                                                                                                                                                                                                                                                                                                                                                                                                                                                                                                                                                                                                                                                                                                                                                                                                                                                                                                                                                                                                                                                                                                                                                                                                                                                                                                                                                                                                                                                                                                                                                                                                                                                                                                                                                                                                                                                                                                                                                                                                                                                                                                                                                                                                                                                                                                                                                                                                                                                                                                                                                                                                                                      |        |                           |           |            |         |                           |           |          |         |                           |           |          |        |                           |          |          |       |                           |          |          |       |             |          |         |        |             |         |         |       |             |         |         |       |             |         |         |       |                                       |          |         |        |                           |          |         |         |                           |          |         |        |                           |          |         |        |                           |         |         |       |                           |         |         |       |                                     |          |         |        |                                     |          |         |        |                                     |          |         |        |                                     |          |         |        |                                     |          |         |        |                                                   |         |         |       |                                                   |         |         |       |                                                   |         |         |       |                                                   |         |         |       |                                                   |         |         |       |
| meal_cat_corr_2021VEG*N:Sterne_rep3               | 0.113656                                                                                                                                                                                                                                                                                                                                                                                                                                                                                                                                                                                                                                                                                                                                                                                                                                                                                                                                                                                                                                                                                                                                                                                                                                                                                                                                                                                                                                                                                                                                                                                                                                                                                                                                                                                                                                                                                                                                                                                                                                                                                                                                                                                                                                                                                                                                                                                                                                                                                                                                                                                                                                                                                                                                                                                                                                         | 0.117769    | 0.965        |             |            |         |             |          |          |        |               |           |          |         |                         |           |          |        |             |           |          |        |             |           |          |        |             |           |          |        |             |           |          |        |             |           |          |        |                                       |          |          |       |                           |          |          |       |                           |          |          |       |                           |           |          |        |                           |           |          |        |                           |           |          |        |                                                                                                                                                                                                                                                                                                                                                                                                                                                                                                                                                                                                                                                                                                                                                                                                                                                                                                                                                                                                                                                                                                                                                                                                                                                                                                                                                                                                                                                                                                                                                                                                                                |          |          |          |                                     |          |             |          |                                     |          |               |          |                                     |          |                         |          |                                     |          |             |           |                                                   |           |             |           |                                                   |           |             |          |                                                   |           |             |          |                                                   |           |             |          |                                                   |           |                                       |           |                                                                                                                                                                                                                                                                                                                                                                                                                                                                                                                                                                                                                                                                                                                                                                                                                                                                                                                                                                                                                                                                                                                                                                                                                                                                                                                                                                                                                                                                                                                                                                                                                                                                                                                                                                                                                                                                                                                                                                                                                                                                                                                                                                                                                                                                                                                                                                                                                                                                                                                                                                                                                                                                                                                                                                      |        |                           |           |            |         |                           |           |          |         |                           |           |          |        |                           |          |          |       |                           |          |          |       |             |          |         |        |             |         |         |       |             |         |         |       |             |         |         |       |                                       |          |         |        |                           |          |         |         |                           |          |         |        |                           |          |         |        |                           |         |         |       |                           |         |         |       |                                     |          |         |        |                                     |          |         |        |                                     |          |         |        |                                     |          |         |        |                                     |          |         |        |                                                   |         |         |       |                                                   |         |         |       |                                                   |         |         |       |                                                   |         |         |       |                                                   |         |         |       |
| meal_cat_corr_2021VEG*N:Sterne_rep4               | 0.141104                                                                                                                                                                                                                                                                                                                                                                                                                                                                                                                                                                                                                                                                                                                                                                                                                                                                                                                                                                                                                                                                                                                                                                                                                                                                                                                                                                                                                                                                                                                                                                                                                                                                                                                                                                                                                                                                                                                                                                                                                                                                                                                                                                                                                                                                                                                                                                                                                                                                                                                                                                                                                                                                                                                                                                                                                                         | 0.114431    | 1.233        |             |            |         |             |          |          |        |               |           |          |         |                         |           |          |        |             |           |          |        |             |           |          |        |             |           |          |        |             |           |          |        |             |           |          |        |                                       |          |          |       |                           |          |          |       |                           |          |          |       |                           |           |          |        |                           |           |          |        |                           |           |          |        |                                                                                                                                                                                                                                                                                                                                                                                                                                                                                                                                                                                                                                                                                                                                                                                                                                                                                                                                                                                                                                                                                                                                                                                                                                                                                                                                                                                                                                                                                                                                                                                                                                |          |          |          |                                     |          |             |          |                                     |          |               |          |                                     |          |                         |          |                                     |          |             |           |                                                   |           |             |           |                                                   |           |             |          |                                                   |           |             |          |                                                   |           |             |          |                                                   |           |                                       |           |                                                                                                                                                                                                                                                                                                                                                                                                                                                                                                                                                                                                                                                                                                                                                                                                                                                                                                                                                                                                                                                                                                                                                                                                                                                                                                                                                                                                                                                                                                                                                                                                                                                                                                                                                                                                                                                                                                                                                                                                                                                                                                                                                                                                                                                                                                                                                                                                                                                                                                                                                                                                                                                                                                                                                                      |        |                           |           |            |         |                           |           |          |         |                           |           |          |        |                           |          |          |       |                           |          |          |       |             |          |         |        |             |         |         |       |             |         |         |       |             |         |         |       |                                       |          |         |        |                           |          |         |         |                           |          |         |        |                           |          |         |        |                           |         |         |       |                           |         |         |       |                                     |          |         |        |                                     |          |         |        |                                     |          |         |        |                                     |          |         |        |                                     |          |         |        |                                                   |         |         |       |                                                   |         |         |       |                                                   |         |         |       |                                                   |         |         |       |                                                   |         |         |       |
| meal_cat_corr_2021VEG*N:Sterne_rep5               | 0.076491                                                                                                                                                                                                                                                                                                                                                                                                                                                                                                                                                                                                                                                                                                                                                                                                                                                                                                                                                                                                                                                                                                                                                                                                                                                                                                                                                                                                                                                                                                                                                                                                                                                                                                                                                                                                                                                                                                                                                                                                                                                                                                                                                                                                                                                                                                                                                                                                                                                                                                                                                                                                                                                                                                                                                                                                                                         | 0.114298    | 0.669        |             |            |         |             |          |          |        |               |           |          |         |                         |           |          |        |             |           |          |        |             |           |          |        |             |           |          |        |             |           |          |        |             |           |          |        |                                       |          |          |       |                           |          |          |       |                           |          |          |       |                           |           |          |        |                           |           |          |        |                           |           |          |        |                                                                                                                                                                                                                                                                                                                                                                                                                                                                                                                                                                                                                                                                                                                                                                                                                                                                                                                                                                                                                                                                                                                                                                                                                                                                                                                                                                                                                                                                                                                                                                                                                                |          |          |          |                                     |          |             |          |                                     |          |               |          |                                     |          |                         |          |                                     |          |             |           |                                                   |           |             |           |                                                   |           |             |          |                                                   |           |             |          |                                                   |           |             |          |                                                   |           |                                       |           |                                                                                                                                                                                                                                                                                                                                                                                                                                                                                                                                                                                                                                                                                                                                                                                                                                                                                                                                                                                                                                                                                                                                                                                                                                                                                                                                                                                                                                                                                                                                                                                                                                                                                                                                                                                                                                                                                                                                                                                                                                                                                                                                                                                                                                                                                                                                                                                                                                                                                                                                                                                                                                                                                                                                                                      |        |                           |           |            |         |                           |           |          |         |                           |           |          |        |                           |          |          |       |                           |          |          |       |             |          |         |        |             |         |         |       |             |         |         |       |             |         |         |       |                                       |          |         |        |                           |          |         |         |                           |          |         |        |                           |          |         |        |                           |         |         |       |                           |         |         |       |                                     |          |         |        |                                     |          |         |        |                                     |          |         |        |                                     |          |         |        |                                     |          |         |        |                                                   |         |         |       |                                                   |         |         |       |                                                   |         |         |       |                                                   |         |         |       |                                                   |         |         |       |
| timepointpost:meal_cat_corr_2021VEG*N:Sterne_rep1 | -0.581310                                                                                                                                                                                                                                                                                                                                                                                                                                                                                                                                                                                                                                                                                                                                                                                                                                                                                                                                                                                                                                                                                                                                                                                                                                                                                                                                                                                                                                                                                                                                                                                                                                                                                                                                                                                                                                                                                                                                                                                                                                                                                                                                                                                                                                                                                                                                                                                                                                                                                                                                                                                                                                                                                                                                                                                                                                        | 0.171577    | -3.388       |             |            |         |             |          |          |        |               |           |          |         |                         |           |          |        |             |           |          |        |             |           |          |        |             |           |          |        |             |           |          |        |             |           |          |        |                                       |          |          |       |                           |          |          |       |                           |          |          |       |                           |           |          |        |                           |           |          |        |                           |           |          |        |                                                                                                                                                                                                                                                                                                                                                                                                                                                                                                                                                                                                                                                                                                                                                                                                                                                                                                                                                                                                                                                                                                                                                                                                                                                                                                                                                                                                                                                                                                                                                                                                                                |          |          |          |                                     |          |             |          |                                     |          |               |          |                                     |          |                         |          |                                     |          |             |           |                                                   |           |             |           |                                                   |           |             |          |                                                   |           |             |          |                                                   |           |             |          |                                                   |           |                                       |           |                                                                                                                                                                                                                                                                                                                                                                                                                                                                                                                                                                                                                                                                                                                                                                                                                                                                                                                                                                                                                                                                                                                                                                                                                                                                                                                                                                                                                                                                                                                                                                                                                                                                                                                                                                                                                                                                                                                                                                                                                                                                                                                                                                                                                                                                                                                                                                                                                                                                                                                                                                                                                                                                                                                                                                      |        |                           |           |            |         |                           |           |          |         |                           |           |          |        |                           |          |          |       |                           |          |          |       |             |          |         |        |             |         |         |       |             |         |         |       |             |         |         |       |                                       |          |         |        |                           |          |         |         |                           |          |         |        |                           |          |         |        |                           |         |         |       |                           |         |         |       |                                     |          |         |        |                                     |          |         |        |                                     |          |         |        |                                     |          |         |        |                                     |          |         |        |                                                   |         |         |       |                                                   |         |         |       |                                                   |         |         |       |                                                   |         |         |       |                                                   |         |         |       |
| timepointpost:meal_cat_corr_2021VEG*N:Sterne_rep2 | -0.462081                                                                                                                                                                                                                                                                                                                                                                                                                                                                                                                                                                                                                                                                                                                                                                                                                                                                                                                                                                                                                                                                                                                                                                                                                                                                                                                                                                                                                                                                                                                                                                                                                                                                                                                                                                                                                                                                                                                                                                                                                                                                                                                                                                                                                                                                                                                                                                                                                                                                                                                                                                                                                                                                                                                                                                                                                                        | 0.168816    | -2.737       |             |            |         |             |          |          |        |               |           |          |         |                         |           |          |        |             |           |          |        |             |           |          |        |             |           |          |        |             |           |          |        |             |           |          |        |                                       |          |          |       |                           |          |          |       |                           |          |          |       |                           |           |          |        |                           |           |          |        |                           |           |          |        |                                                                                                                                                                                                                                                                                                                                                                                                                                                                                                                                                                                                                                                                                                                                                                                                                                                                                                                                                                                                                                                                                                                                                                                                                                                                                                                                                                                                                                                                                                                                                                                                                                |          |          |          |                                     |          |             |          |                                     |          |               |          |                                     |          |                         |          |                                     |          |             |           |                                                   |           |             |           |                                                   |           |             |          |                                                   |           |             |          |                                                   |           |             |          |                                                   |           |                                       |           |                                                                                                                                                                                                                                                                                                                                                                                                                                                                                                                                                                                                                                                                                                                                                                                                                                                                                                                                                                                                                                                                                                                                                                                                                                                                                                                                                                                                                                                                                                                                                                                                                                                                                                                                                                                                                                                                                                                                                                                                                                                                                                                                                                                                                                                                                                                                                                                                                                                                                                                                                                                                                                                                                                                                                                      |        |                           |           |            |         |                           |           |          |         |                           |           |          |        |                           |          |          |       |                           |          |          |       |             |          |         |        |             |         |         |       |             |         |         |       |             |         |         |       |                                       |          |         |        |                           |          |         |         |                           |          |         |        |                           |          |         |        |                           |         |         |       |                           |         |         |       |                                     |          |         |        |                                     |          |         |        |                                     |          |         |        |                                     |          |         |        |                                     |          |         |        |                                                   |         |         |       |                                                   |         |         |       |                                                   |         |         |       |                                                   |         |         |       |                                                   |         |         |       |
| timepointpost:meal_cat_corr_2021VEG*N:Sterne_rep3 | -0.332452                                                                                                                                                                                                                                                                                                                                                                                                                                                                                                                                                                                                                                                                                                                                                                                                                                                                                                                                                                                                                                                                                                                                                                                                                                                                                                                                                                                                                                                                                                                                                                                                                                                                                                                                                                                                                                                                                                                                                                                                                                                                                                                                                                                                                                                                                                                                                                                                                                                                                                                                                                                                                                                                                                                                                                                                                                        | 0.149848    | -2.219       |             |            |         |             |          |          |        |               |           |          |         |                         |           |          |        |             |           |          |        |             |           |          |        |             |           |          |        |             |           |          |        |             |           |          |        |                                       |          |          |       |                           |          |          |       |                           |          |          |       |                           |           |          |        |                           |           |          |        |                           |           |          |        |                                                                                                                                                                                                                                                                                                                                                                                                                                                                                                                                                                                                                                                                                                                                                                                                                                                                                                                                                                                                                                                                                                                                                                                                                                                                                                                                                                                                                                                                                                                                                                                                                                |          |          |          |                                     |          |             |          |                                     |          |               |          |                                     |          |                         |          |                                     |          |             |           |                                                   |           |             |           |                                                   |           |             |          |                                                   |           |             |          |                                                   |           |             |          |                                                   |           |                                       |           |                                                                                                                                                                                                                                                                                                                                                                                                                                                                                                                                                                                                                                                                                                                                                                                                                                                                                                                                                                                                                                                                                                                                                                                                                                                                                                                                                                                                                                                                                                                                                                                                                                                                                                                                                                                                                                                                                                                                                                                                                                                                                                                                                                                                                                                                                                                                                                                                                                                                                                                                                                                                                                                                                                                                                                      |        |                           |           |            |         |                           |           |          |         |                           |           |          |        |                           |          |          |       |                           |          |          |       |             |          |         |        |             |         |         |       |             |         |         |       |             |         |         |       |                                       |          |         |        |                           |          |         |         |                           |          |         |        |                           |          |         |        |                           |         |         |       |                           |         |         |       |                                     |          |         |        |                                     |          |         |        |                                     |          |         |        |                                     |          |         |        |                                     |          |         |        |                                                   |         |         |       |                                                   |         |         |       |                                                   |         |         |       |                                                   |         |         |       |                                                   |         |         |       |
| timepointpost:meal_cat_corr_2021VEG*N:Sterne_rep4 | -0.333598                                                                                                                                                                                                                                                                                                                                                                                                                                                                                                                                                                                                                                                                                                                                                                                                                                                                                                                                                                                                                                                                                                                                                                                                                                                                                                                                                                                                                                                                                                                                                                                                                                                                                                                                                                                                                                                                                                                                                                                                                                                                                                                                                                                                                                                                                                                                                                                                                                                                                                                                                                                                                                                                                                                                                                                                                                        | 0.145614    | -2.291       |             |            |         |             |          |          |        |               |           |          |         |                         |           |          |        |             |           |          |        |             |           |          |        |             |           |          |        |             |           |          |        |             |           |          |        |                                       |          |          |       |                           |          |          |       |                           |          |          |       |                           |           |          |        |                           |           |          |        |                           |           |          |        |                                                                                                                                                                                                                                                                                                                                                                                                                                                                                                                                                                                                                                                                                                                                                                                                                                                                                                                                                                                                                                                                                                                                                                                                                                                                                                                                                                                                                                                                                                                                                                                                                                |          |          |          |                                     |          |             |          |                                     |          |               |          |                                     |          |                         |          |                                     |          |             |           |                                                   |           |             |           |                                                   |           |             |          |                                                   |           |             |          |                                                   |           |             |          |                                                   |           |                                       |           |                                                                                                                                                                                                                                                                                                                                                                                                                                                                                                                                                                                                                                                                                                                                                                                                                                                                                                                                                                                                                                                                                                                                                                                                                                                                                                                                                                                                                                                                                                                                                                                                                                                                                                                                                                                                                                                                                                                                                                                                                                                                                                                                                                                                                                                                                                                                                                                                                                                                                                                                                                                                                                                                                                                                                                      |        |                           |           |            |         |                           |           |          |         |                           |           |          |        |                           |          |          |       |                           |          |          |       |             |          |         |        |             |         |         |       |             |         |         |       |             |         |         |       |                                       |          |         |        |                           |          |         |         |                           |          |         |        |                           |          |         |        |                           |         |         |       |                           |         |         |       |                                     |          |         |        |                                     |          |         |        |                                     |          |         |        |                                     |          |         |        |                                     |          |         |        |                                                   |         |         |       |                                                   |         |         |       |                                                   |         |         |       |                                                   |         |         |       |                                                   |         |         |       |
| timepointpost:meal_cat_corr_2021VEG*N:Sterne_rep5 | -0.260018                                                                                                                                                                                                                                                                                                                                                                                                                                                                                                                                                                                                                                                                                                                                                                                                                                                                                                                                                                                                                                                                                                                                                                                                                                                                                                                                                                                                                                                                                                                                                                                                                                                                                                                                                                                                                                                                                                                                                                                                                                                                                                                                                                                                                                                                                                                                                                                                                                                                                                                                                                                                                                                                                                                                                                                                                                        | 0.145473    | -1.787       |             |            |         |             |          |          |        |               |           |          |         |                         |           |          |        |             |           |          |        |             |           |          |        |             |           |          |        |             |           |          |        |             |           |          |        |                                       |          |          |       |                           |          |          |       |                           |          |          |       |                           |           |          |        |                           |           |          |        |                           |           |          |        |                                                                                                                                                                                                                                                                                                                                                                                                                                                                                                                                                                                                                                                                                                                                                                                                                                                                                                                                                                                                                                                                                                                                                                                                                                                                                                                                                                                                                                                                                                                                                                                                                                |          |          |          |                                     |          |             |          |                                     |          |               |          |                                     |          |                         |          |                                     |          |             |           |                                                   |           |             |           |                                                   |           |             |          |                                                   |           |             |          |                                                   |           |             |          |                                                   |           |                                       |           |                                                                                                                                                                                                                                                                                                                                                                                                                                                                                                                                                                                                                                                                                                                                                                                                                                                                                                                                                                                                                                                                                                                                                                                                                                                                                                                                                                                                                                                                                                                                                                                                                                                                                                                                                                                                                                                                                                                                                                                                                                                                                                                                                                                                                                                                                                                                                                                                                                                                                                                                                                                                                                                                                                                                                                      |        |                           |           |            |         |                           |           |          |         |                           |           |          |        |                           |          |          |       |                           |          |          |       |             |          |         |        |             |         |         |       |             |         |         |       |             |         |         |       |                                       |          |         |        |                           |          |         |         |                           |          |         |        |                           |          |         |        |                           |         |         |       |                           |         |         |       |                                     |          |         |        |                                     |          |         |        |                                     |          |         |        |                                     |          |         |        |                                     |          |         |        |                                                   |         |         |       |                                                   |         |         |       |                                                   |         |         |       |                                                   |         |         |       |                                                   |         |         |       |
|                                                   | Estimate                                                                                                                                                                                                                                                                                                                                                                                                                                                                                                                                                                                                                                                                                                                                                                                                                                                                                                                                                                                                                                                                                                                                                                                                                                                                                                                                                                                                                                                                                                                                                                                                                                                                                                                                                                                                                                                                                                                                                                                                                                                                                                                                                                                                                                                                                                                                                                                                                                                                                                                                                                                                                                                                                                                                                                                                                                         | Std. Error  | t value      |             |            |         |             |          |          |        |               |           |          |         |                         |           |          |        |             |           |          |        |             |           |          |        |             |           |          |        |             |           |          |        |             |           |          |        |                                       |          |          |       |                           |          |          |       |                           |          |          |       |                           |           |          |        |                           |           |          |        |                           |           |          |        |                                                                                                                                                                                                                                                                                                                                                                                                                                                                                                                                                                                                                                                                                                                                                                                                                                                                                                                                                                                                                                                                                                                                                                                                                                                                                                                                                                                                                                                                                                                                                                                                                                |          |          |          |                                     |          |             |          |                                     |          |               |          |                                     |          |                         |          |                                     |          |             |           |                                                   |           |             |           |                                                   |           |             |          |                                                   |           |             |          |                                                   |           |             |          |                                                   |           |                                       |           |                                                                                                                                                                                                                                                                                                                                                                                                                                                                                                                                                                                                                                                                                                                                                                                                                                                                                                                                                                                                                                                                                                                                                                                                                                                                                                                                                                                                                                                                                                                                                                                                                                                                                                                                                                                                                                                                                                                                                                                                                                                                                                                                                                                                                                                                                                                                                                                                                                                                                                                                                                                                                                                                                                                                                                      |        |                           |           |            |         |                           |           |          |         |                           |           |          |        |                           |          |          |       |                           |          |          |       |             |          |         |        |             |         |         |       |             |         |         |       |             |         |         |       |                                       |          |         |        |                           |          |         |         |                           |          |         |        |                           |          |         |        |                           |         |         |       |                           |         |         |       |                                     |          |         |        |                                     |          |         |        |                                     |          |         |        |                                     |          |         |        |                                     |          |         |        |                                                   |         |         |       |                                                   |         |         |       |                                                   |         |         |       |                                                   |         |         |       |                                                   |         |         |       |
| (Intercept)                                       | 3.31829                                                                                                                                                                                                                                                                                                                                                                                                                                                                                                                                                                                                                                                                                                                                                                                                                                                                                                                                                                                                                                                                                                                                                                                                                                                                                                                                                                                                                                                                                                                                                                                                                                                                                                                                                                                                                                                                                                                                                                                                                                                                                                                                                                                                                                                                                                                                                                                                                                                                                                                                                                                                                                                                                                                                                                                                                                          | 0.06417     | 51.710       |             |            |         |             |          |          |        |               |           |          |         |                         |           |          |        |             |           |          |        |             |           |          |        |             |           |          |        |             |           |          |        |             |           |          |        |                                       |          |          |       |                           |          |          |       |                           |          |          |       |                           |           |          |        |                           |           |          |        |                           |           |          |        |                                                                                                                                                                                                                                                                                                                                                                                                                                                                                                                                                                                                                                                                                                                                                                                                                                                                                                                                                                                                                                                                                                                                                                                                                                                                                                                                                                                                                                                                                                                                                                                                                                |          |          |          |                                     |          |             |          |                                     |          |               |          |                                     |          |                         |          |                                     |          |             |           |                                                   |           |             |           |                                                   |           |             |          |                                                   |           |             |          |                                                   |           |             |          |                                                   |           |                                       |           |                                                                                                                                                                                                                                                                                                                                                                                                                                                                                                                                                                                                                                                                                                                                                                                                                                                                                                                                                                                                                                                                                                                                                                                                                                                                                                                                                                                                                                                                                                                                                                                                                                                                                                                                                                                                                                                                                                                                                                                                                                                                                                                                                                                                                                                                                                                                                                                                                                                                                                                                                                                                                                                                                                                                                                      |        |                           |           |            |         |                           |           |          |         |                           |           |          |        |                           |          |          |       |                           |          |          |       |             |          |         |        |             |         |         |       |             |         |         |       |             |         |         |       |                                       |          |         |        |                           |          |         |         |                           |          |         |        |                           |          |         |        |                           |         |         |       |                           |         |         |       |                                     |          |         |        |                                     |          |         |        |                                     |          |         |        |                                     |          |         |        |                                     |          |         |        |                                                   |         |         |       |                                                   |         |         |       |                                                   |         |         |       |                                                   |         |         |       |                                                   |         |         |       |
| timepointpost                                     | 0.18425                                                                                                                                                                                                                                                                                                                                                                                                                                                                                                                                                                                                                                                                                                                                                                                                                                                                                                                                                                                                                                                                                                                                                                                                                                                                                                                                                                                                                                                                                                                                                                                                                                                                                                                                                                                                                                                                                                                                                                                                                                                                                                                                                                                                                                                                                                                                                                                                                                                                                                                                                                                                                                                                                                                                                                                                                                          | 0.06933     | 2.657        |             |            |         |             |          |          |        |               |           |          |         |                         |           |          |        |             |           |          |        |             |           |          |        |             |           |          |        |             |           |          |        |             |           |          |        |                                       |          |          |       |                           |          |          |       |                           |          |          |       |                           |           |          |        |                           |           |          |        |                           |           |          |        |                                                                                                                                                                                                                                                                                                                                                                                                                                                                                                                                                                                                                                                                                                                                                                                                                                                                                                                                                                                                                                                                                                                                                                                                                                                                                                                                                                                                                                                                                                                                                                                                                                |          |          |          |                                     |          |             |          |                                     |          |               |          |                                     |          |                         |          |                                     |          |             |           |                                                   |           |             |           |                                                   |           |             |          |                                                   |           |             |          |                                                   |           |             |          |                                                   |           |                                       |           |                                                                                                                                                                                                                                                                                                                                                                                                                                                                                                                                                                                                                                                                                                                                                                                                                                                                                                                                                                                                                                                                                                                                                                                                                                                                                                                                                                                                                                                                                                                                                                                                                                                                                                                                                                                                                                                                                                                                                                                                                                                                                                                                                                                                                                                                                                                                                                                                                                                                                                                                                                                                                                                                                                                                                                      |        |                           |           |            |         |                           |           |          |         |                           |           |          |        |                           |          |          |       |                           |          |          |       |             |          |         |        |             |         |         |       |             |         |         |       |             |         |         |       |                                       |          |         |        |                           |          |         |         |                           |          |         |        |                           |          |         |        |                           |         |         |       |                           |         |         |       |                                     |          |         |        |                                     |          |         |        |                                     |          |         |        |                                     |          |         |        |                                     |          |         |        |                                                   |         |         |       |                                                   |         |         |       |                                                   |         |         |       |                                                   |         |         |       |                                                   |         |         |       |
| meal_cat_corr_2021VEG*N                           | 0.15031                                                                                                                                                                                                                                                                                                                                                                                                                                                                                                                                                                                                                                                                                                                                                                                                                                                                                                                                                                                                                                                                                                                                                                                                                                                                                                                                                                                                                                                                                                                                                                                                                                                                                                                                                                                                                                                                                                                                                                                                                                                                                                                                                                                                                                                                                                                                                                                                                                                                                                                                                                                                                                                                                                                                                                                                                                          | 0.09509     | 1.581        |             |            |         |             |          |          |        |               |           |          |         |                         |           |          |        |             |           |          |        |             |           |          |        |             |           |          |        |             |           |          |        |             |           |          |        |                                       |          |          |       |                           |          |          |       |                           |          |          |       |                           |           |          |        |                           |           |          |        |                           |           |          |        |                                                                                                                                                                                                                                                                                                                                                                                                                                                                                                                                                                                                                                                                                                                                                                                                                                                                                                                                                                                                                                                                                                                                                                                                                                                                                                                                                                                                                                                                                                                                                                                                                                |          |          |          |                                     |          |             |          |                                     |          |               |          |                                     |          |                         |          |                                     |          |             |           |                                                   |           |             |           |                                                   |           |             |          |                                                   |           |             |          |                                                   |           |             |          |                                                   |           |                                       |           |                                                                                                                                                                                                                                                                                                                                                                                                                                                                                                                                                                                                                                                                                                                                                                                                                                                                                                                                                                                                                                                                                                                                                                                                                                                                                                                                                                                                                                                                                                                                                                                                                                                                                                                                                                                                                                                                                                                                                                                                                                                                                                                                                                                                                                                                                                                                                                                                                                                                                                                                                                                                                                                                                                                                                                      |        |                           |           |            |         |                           |           |          |         |                           |           |          |        |                           |          |          |       |                           |          |          |       |             |          |         |        |             |         |         |       |             |         |         |       |             |         |         |       |                                       |          |         |        |                           |          |         |         |                           |          |         |        |                           |          |         |        |                           |         |         |       |                           |         |         |       |                                     |          |         |        |                                     |          |         |        |                                     |          |         |        |                                     |          |         |        |                                     |          |         |        |                                                   |         |         |       |                                                   |         |         |       |                                                   |         |         |       |                                                   |         |         |       |                                                   |         |         |       |
| Sterne_rep1                                       | 0.03156                                                                                                                                                                                                                                                                                                                                                                                                                                                                                                                                                                                                                                                                                                                                                                                                                                                                                                                                                                                                                                                                                                                                                                                                                                                                                                                                                                                                                                                                                                                                                                                                                                                                                                                                                                                                                                                                                                                                                                                                                                                                                                                                                                                                                                                                                                                                                                                                                                                                                                                                                                                                                                                                                                                                                                                                                                          | 0.07870     | 0.401        |             |            |         |             |          |          |        |               |           |          |         |                         |           |          |        |             |           |          |        |             |           |          |        |             |           |          |        |             |           |          |        |             |           |          |        |                                       |          |          |       |                           |          |          |       |                           |          |          |       |                           |           |          |        |                           |           |          |        |                           |           |          |        |                                                                                                                                                                                                                                                                                                                                                                                                                                                                                                                                                                                                                                                                                                                                                                                                                                                                                                                                                                                                                                                                                                                                                                                                                                                                                                                                                                                                                                                                                                                                                                                                                                |          |          |          |                                     |          |             |          |                                     |          |               |          |                                     |          |                         |          |                                     |          |             |           |                                                   |           |             |           |                                                   |           |             |          |                                                   |           |             |          |                                                   |           |             |          |                                                   |           |                                       |           |                                                                                                                                                                                                                                                                                                                                                                                                                                                                                                                                                                                                                                                                                                                                                                                                                                                                                                                                                                                                                                                                                                                                                                                                                                                                                                                                                                                                                                                                                                                                                                                                                                                                                                                                                                                                                                                                                                                                                                                                                                                                                                                                                                                                                                                                                                                                                                                                                                                                                                                                                                                                                                                                                                                                                                      |        |                           |           |            |         |                           |           |          |         |                           |           |          |        |                           |          |          |       |                           |          |          |       |             |          |         |        |             |         |         |       |             |         |         |       |             |         |         |       |                                       |          |         |        |                           |          |         |         |                           |          |         |        |                           |          |         |        |                           |         |         |       |                           |         |         |       |                                     |          |         |        |                                     |          |         |        |                                     |          |         |        |                                     |          |         |        |                                     |          |         |        |                                                   |         |         |       |                                                   |         |         |       |                                                   |         |         |       |                                                   |         |         |       |                                                   |         |         |       |
| Sterne_rep2                                       | -0.05081                                                                                                                                                                                                                                                                                                                                                                                                                                                                                                                                                                                                                                                                                                                                                                                                                                                                                                                                                                                                                                                                                                                                                                                                                                                                                                                                                                                                                                                                                                                                                                                                                                                                                                                                                                                                                                                                                                                                                                                                                                                                                                                                                                                                                                                                                                                                                                                                                                                                                                                                                                                                                                                                                                                                                                                                                                         | 0.07825     | -0.649       |             |            |         |             |          |          |        |               |           |          |         |                         |           |          |        |             |           |          |        |             |           |          |        |             |           |          |        |             |           |          |        |             |           |          |        |                                       |          |          |       |                           |          |          |       |                           |          |          |       |                           |           |          |        |                           |           |          |        |                           |           |          |        |                                                                                                                                                                                                                                                                                                                                                                                                                                                                                                                                                                                                                                                                                                                                                                                                                                                                                                                                                                                                                                                                                                                                                                                                                                                                                                                                                                                                                                                                                                                                                                                                                                |          |          |          |                                     |          |             |          |                                     |          |               |          |                                     |          |                         |          |                                     |          |             |           |                                                   |           |             |           |                                                   |           |             |          |                                                   |           |             |          |                                                   |           |             |          |                                                   |           |                                       |           |                                                                                                                                                                                                                                                                                                                                                                                                                                                                                                                                                                                                                                                                                                                                                                                                                                                                                                                                                                                                                                                                                                                                                                                                                                                                                                                                                                                                                                                                                                                                                                                                                                                                                                                                                                                                                                                                                                                                                                                                                                                                                                                                                                                                                                                                                                                                                                                                                                                                                                                                                                                                                                                                                                                                                                      |        |                           |           |            |         |                           |           |          |         |                           |           |          |        |                           |          |          |       |                           |          |          |       |             |          |         |        |             |         |         |       |             |         |         |       |             |         |         |       |                                       |          |         |        |                           |          |         |         |                           |          |         |        |                           |          |         |        |                           |         |         |       |                           |         |         |       |                                     |          |         |        |                                     |          |         |        |                                     |          |         |        |                                     |          |         |        |                                     |          |         |        |                                                   |         |         |       |                                                   |         |         |       |                                                   |         |         |       |                                                   |         |         |       |                                                   |         |         |       |
| Sterne_rep3                                       | 0.07212                                                                                                                                                                                                                                                                                                                                                                                                                                                                                                                                                                                                                                                                                                                                                                                                                                                                                                                                                                                                                                                                                                                                                                                                                                                                                                                                                                                                                                                                                                                                                                                                                                                                                                                                                                                                                                                                                                                                                                                                                                                                                                                                                                                                                                                                                                                                                                                                                                                                                                                                                                                                                                                                                                                                                                                                                                          | 0.06751     | 1.068        |             |            |         |             |          |          |        |               |           |          |         |                         |           |          |        |             |           |          |        |             |           |          |        |             |           |          |        |             |           |          |        |             |           |          |        |                                       |          |          |       |                           |          |          |       |                           |          |          |       |                           |           |          |        |                           |           |          |        |                           |           |          |        |                                                                                                                                                                                                                                                                                                                                                                                                                                                                                                                                                                                                                                                                                                                                                                                                                                                                                                                                                                                                                                                                                                                                                                                                                                                                                                                                                                                                                                                                                                                                                                                                                                |          |          |          |                                     |          |             |          |                                     |          |               |          |                                     |          |                         |          |                                     |          |             |           |                                                   |           |             |           |                                                   |           |             |          |                                                   |           |             |          |                                                   |           |             |          |                                                   |           |                                       |           |                                                                                                                                                                                                                                                                                                                                                                                                                                                                                                                                                                                                                                                                                                                                                                                                                                                                                                                                                                                                                                                                                                                                                                                                                                                                                                                                                                                                                                                                                                                                                                                                                                                                                                                                                                                                                                                                                                                                                                                                                                                                                                                                                                                                                                                                                                                                                                                                                                                                                                                                                                                                                                                                                                                                                                      |        |                           |           |            |         |                           |           |          |         |                           |           |          |        |                           |          |          |       |                           |          |          |       |             |          |         |        |             |         |         |       |             |         |         |       |             |         |         |       |                                       |          |         |        |                           |          |         |         |                           |          |         |        |                           |          |         |        |                           |         |         |       |                           |         |         |       |                                     |          |         |        |                                     |          |         |        |                                     |          |         |        |                                     |          |         |        |                                     |          |         |        |                                                   |         |         |       |                                                   |         |         |       |                                                   |         |         |       |                                                   |         |         |       |                                                   |         |         |       |
| Sterne_rep4                                       | 0.17088                                                                                                                                                                                                                                                                                                                                                                                                                                                                                                                                                                                                                                                                                                                                                                                                                                                                                                                                                                                                                                                                                                                                                                                                                                                                                                                                                                                                                                                                                                                                                                                                                                                                                                                                                                                                                                                                                                                                                                                                                                                                                                                                                                                                                                                                                                                                                                                                                                                                                                                                                                                                                                                                                                                                                                                                                                          | 0.06539     | 2.613        |             |            |         |             |          |          |        |               |           |          |         |                         |           |          |        |             |           |          |        |             |           |          |        |             |           |          |        |             |           |          |        |             |           |          |        |                                       |          |          |       |                           |          |          |       |                           |          |          |       |                           |           |          |        |                           |           |          |        |                           |           |          |        |                                                                                                                                                                                                                                                                                                                                                                                                                                                                                                                                                                                                                                                                                                                                                                                                                                                                                                                                                                                                                                                                                                                                                                                                                                                                                                                                                                                                                                                                                                                                                                                                                                |          |          |          |                                     |          |             |          |                                     |          |               |          |                                     |          |                         |          |                                     |          |             |           |                                                   |           |             |           |                                                   |           |             |          |                                                   |           |             |          |                                                   |           |             |          |                                                   |           |                                       |           |                                                                                                                                                                                                                                                                                                                                                                                                                                                                                                                                                                                                                                                                                                                                                                                                                                                                                                                                                                                                                                                                                                                                                                                                                                                                                                                                                                                                                                                                                                                                                                                                                                                                                                                                                                                                                                                                                                                                                                                                                                                                                                                                                                                                                                                                                                                                                                                                                                                                                                                                                                                                                                                                                                                                                                      |        |                           |           |            |         |                           |           |          |         |                           |           |          |        |                           |          |          |       |                           |          |          |       |             |          |         |        |             |         |         |       |             |         |         |       |             |         |         |       |                                       |          |         |        |                           |          |         |         |                           |          |         |        |                           |          |         |        |                           |         |         |       |                           |         |         |       |                                     |          |         |        |                                     |          |         |        |                                     |          |         |        |                                     |          |         |        |                                     |          |         |        |                                                   |         |         |       |                                                   |         |         |       |                                                   |         |         |       |                                                   |         |         |       |                                                   |         |         |       |
| Sterne_rep5                                       | 0.23545                                                                                                                                                                                                                                                                                                                                                                                                                                                                                                                                                                                                                                                                                                                                                                                                                                                                                                                                                                                                                                                                                                                                                                                                                                                                                                                                                                                                                                                                                                                                                                                                                                                                                                                                                                                                                                                                                                                                                                                                                                                                                                                                                                                                                                                                                                                                                                                                                                                                                                                                                                                                                                                                                                                                                                                                                                          | 0.06527     | 3.607        |             |            |         |             |          |          |        |               |           |          |         |                         |           |          |        |             |           |          |        |             |           |          |        |             |           |          |        |             |           |          |        |             |           |          |        |                                       |          |          |       |                           |          |          |       |                           |          |          |       |                           |           |          |        |                           |           |          |        |                           |           |          |        |                                                                                                                                                                                                                                                                                                                                                                                                                                                                                                                                                                                                                                                                                                                                                                                                                                                                                                                                                                                                                                                                                                                                                                                                                                                                                                                                                                                                                                                                                                                                                                                                                                |          |          |          |                                     |          |             |          |                                     |          |               |          |                                     |          |                         |          |                                     |          |             |           |                                                   |           |             |           |                                                   |           |             |          |                                                   |           |             |          |                                                   |           |             |          |                                                   |           |                                       |           |                                                                                                                                                                                                                                                                                                                                                                                                                                                                                                                                                                                                                                                                                                                                                                                                                                                                                                                                                                                                                                                                                                                                                                                                                                                                                                                                                                                                                                                                                                                                                                                                                                                                                                                                                                                                                                                                                                                                                                                                                                                                                                                                                                                                                                                                                                                                                                                                                                                                                                                                                                                                                                                                                                                                                                      |        |                           |           |            |         |                           |           |          |         |                           |           |          |        |                           |          |          |       |                           |          |          |       |             |          |         |        |             |         |         |       |             |         |         |       |             |         |         |       |                                       |          |         |        |                           |          |         |         |                           |          |         |        |                           |          |         |        |                           |         |         |       |                           |         |         |       |                                     |          |         |        |                                     |          |         |        |                                     |          |         |        |                                     |          |         |        |                                     |          |         |        |                                                   |         |         |       |                                                   |         |         |       |                                                   |         |         |       |                                                   |         |         |       |                                                   |         |         |       |
| timepointpost:meal_cat_corr_2021VEG*N             | -0.11059                                                                                                                                                                                                                                                                                                                                                                                                                                                                                                                                                                                                                                                                                                                                                                                                                                                                                                                                                                                                                                                                                                                                                                                                                                                                                                                                                                                                                                                                                                                                                                                                                                                                                                                                                                                                                                                                                                                                                                                                                                                                                                                                                                                                                                                                                                                                                                                                                                                                                                                                                                                                                                                                                                                                                                                                                                         | 0.10424     | -1.061       |             |            |         |             |          |          |        |               |           |          |         |                         |           |          |        |             |           |          |        |             |           |          |        |             |           |          |        |             |           |          |        |             |           |          |        |                                       |          |          |       |                           |          |          |       |                           |          |          |       |                           |           |          |        |                           |           |          |        |                           |           |          |        |                                                                                                                                                                                                                                                                                                                                                                                                                                                                                                                                                                                                                                                                                                                                                                                                                                                                                                                                                                                                                                                                                                                                                                                                                                                                                                                                                                                                                                                                                                                                                                                                                                |          |          |          |                                     |          |             |          |                                     |          |               |          |                                     |          |                         |          |                                     |          |             |           |                                                   |           |             |           |                                                   |           |             |          |                                                   |           |             |          |                                                   |           |             |          |                                                   |           |                                       |           |                                                                                                                                                                                                                                                                                                                                                                                                                                                                                                                                                                                                                                                                                                                                                                                                                                                                                                                                                                                                                                                                                                                                                                                                                                                                                                                                                                                                                                                                                                                                                                                                                                                                                                                                                                                                                                                                                                                                                                                                                                                                                                                                                                                                                                                                                                                                                                                                                                                                                                                                                                                                                                                                                                                                                                      |        |                           |           |            |         |                           |           |          |         |                           |           |          |        |                           |          |          |       |                           |          |          |       |             |          |         |        |             |         |         |       |             |         |         |       |             |         |         |       |                                       |          |         |        |                           |          |         |         |                           |          |         |        |                           |          |         |        |                           |         |         |       |                           |         |         |       |                                     |          |         |        |                                     |          |         |        |                                     |          |         |        |                                     |          |         |        |                                     |          |         |        |                                                   |         |         |       |                                                   |         |         |       |                                                   |         |         |       |                                                   |         |         |       |                                                   |         |         |       |
| timepointpost:Sterne_rep1                         | -1.42087                                                                                                                                                                                                                                                                                                                                                                                                                                                                                                                                                                                                                                                                                                                                                                                                                                                                                                                                                                                                                                                                                                                                                                                                                                                                                                                                                                                                                                                                                                                                                                                                                                                                                                                                                                                                                                                                                                                                                                                                                                                                                                                                                                                                                                                                                                                                                                                                                                                                                                                                                                                                                                                                                                                                                                                                                                         | 0.08643     | -16.439      |             |            |         |             |          |          |        |               |           |          |         |                         |           |          |        |             |           |          |        |             |           |          |        |             |           |          |        |             |           |          |        |             |           |          |        |                                       |          |          |       |                           |          |          |       |                           |          |          |       |                           |           |          |        |                           |           |          |        |                           |           |          |        |                                                                                                                                                                                                                                                                                                                                                                                                                                                                                                                                                                                                                                                                                                                                                                                                                                                                                                                                                                                                                                                                                                                                                                                                                                                                                                                                                                                                                                                                                                                                                                                                                                |          |          |          |                                     |          |             |          |                                     |          |               |          |                                     |          |                         |          |                                     |          |             |           |                                                   |           |             |           |                                                   |           |             |          |                                                   |           |             |          |                                                   |           |             |          |                                                   |           |                                       |           |                                                                                                                                                                                                                                                                                                                                                                                                                                                                                                                                                                                                                                                                                                                                                                                                                                                                                                                                                                                                                                                                                                                                                                                                                                                                                                                                                                                                                                                                                                                                                                                                                                                                                                                                                                                                                                                                                                                                                                                                                                                                                                                                                                                                                                                                                                                                                                                                                                                                                                                                                                                                                                                                                                                                                                      |        |                           |           |            |         |                           |           |          |         |                           |           |          |        |                           |          |          |       |                           |          |          |       |             |          |         |        |             |         |         |       |             |         |         |       |             |         |         |       |                                       |          |         |        |                           |          |         |         |                           |          |         |        |                           |          |         |        |                           |         |         |       |                           |         |         |       |                                     |          |         |        |                                     |          |         |        |                                     |          |         |        |                                     |          |         |        |                                     |          |         |        |                                                   |         |         |       |                                                   |         |         |       |                                                   |         |         |       |                                                   |         |         |       |                                                   |         |         |       |
| timepointpost:Sterne_rep2                         | -0.69272                                                                                                                                                                                                                                                                                                                                                                                                                                                                                                                                                                                                                                                                                                                                                                                                                                                                                                                                                                                                                                                                                                                                                                                                                                                                                                                                                                                                                                                                                                                                                                                                                                                                                                                                                                                                                                                                                                                                                                                                                                                                                                                                                                                                                                                                                                                                                                                                                                                                                                                                                                                                                                                                                                                                                                                                                                         | 0.08579     | -8.074       |             |            |         |             |          |          |        |               |           |          |         |                         |           |          |        |             |           |          |        |             |           |          |        |             |           |          |        |             |           |          |        |             |           |          |        |                                       |          |          |       |                           |          |          |       |                           |          |          |       |                           |           |          |        |                           |           |          |        |                           |           |          |        |                                                                                                                                                                                                                                                                                                                                                                                                                                                                                                                                                                                                                                                                                                                                                                                                                                                                                                                                                                                                                                                                                                                                                                                                                                                                                                                                                                                                                                                                                                                                                                                                                                |          |          |          |                                     |          |             |          |                                     |          |               |          |                                     |          |                         |          |                                     |          |             |           |                                                   |           |             |           |                                                   |           |             |          |                                                   |           |             |          |                                                   |           |             |          |                                                   |           |                                       |           |                                                                                                                                                                                                                                                                                                                                                                                                                                                                                                                                                                                                                                                                                                                                                                                                                                                                                                                                                                                                                                                                                                                                                                                                                                                                                                                                                                                                                                                                                                                                                                                                                                                                                                                                                                                                                                                                                                                                                                                                                                                                                                                                                                                                                                                                                                                                                                                                                                                                                                                                                                                                                                                                                                                                                                      |        |                           |           |            |         |                           |           |          |         |                           |           |          |        |                           |          |          |       |                           |          |          |       |             |          |         |        |             |         |         |       |             |         |         |       |             |         |         |       |                                       |          |         |        |                           |          |         |         |                           |          |         |        |                           |          |         |        |                           |         |         |       |                           |         |         |       |                                     |          |         |        |                                     |          |         |        |                                     |          |         |        |                                     |          |         |        |                                     |          |         |        |                                                   |         |         |       |                                                   |         |         |       |                                                   |         |         |       |                                                   |         |         |       |                                                   |         |         |       |
| timepointpost:Sterne_rep3                         | -0.19459                                                                                                                                                                                                                                                                                                                                                                                                                                                                                                                                                                                                                                                                                                                                                                                                                                                                                                                                                                                                                                                                                                                                                                                                                                                                                                                                                                                                                                                                                                                                                                                                                                                                                                                                                                                                                                                                                                                                                                                                                                                                                                                                                                                                                                                                                                                                                                                                                                                                                                                                                                                                                                                                                                                                                                                                                                         | 0.07404     | -2.628       |             |            |         |             |          |          |        |               |           |          |         |                         |           |          |        |             |           |          |        |             |           |          |        |             |           |          |        |             |           |          |        |             |           |          |        |                                       |          |          |       |                           |          |          |       |                           |          |          |       |                           |           |          |        |                           |           |          |        |                           |           |          |        |                                                                                                                                                                                                                                                                                                                                                                                                                                                                                                                                                                                                                                                                                                                                                                                                                                                                                                                                                                                                                                                                                                                                                                                                                                                                                                                                                                                                                                                                                                                                                                                                                                |          |          |          |                                     |          |             |          |                                     |          |               |          |                                     |          |                         |          |                                     |          |             |           |                                                   |           |             |           |                                                   |           |             |          |                                                   |           |             |          |                                                   |           |             |          |                                                   |           |                                       |           |                                                                                                                                                                                                                                                                                                                                                                                                                                                                                                                                                                                                                                                                                                                                                                                                                                                                                                                                                                                                                                                                                                                                                                                                                                                                                                                                                                                                                                                                                                                                                                                                                                                                                                                                                                                                                                                                                                                                                                                                                                                                                                                                                                                                                                                                                                                                                                                                                                                                                                                                                                                                                                                                                                                                                                      |        |                           |           |            |         |                           |           |          |         |                           |           |          |        |                           |          |          |       |                           |          |          |       |             |          |         |        |             |         |         |       |             |         |         |       |             |         |         |       |                                       |          |         |        |                           |          |         |         |                           |          |         |        |                           |          |         |        |                           |         |         |       |                           |         |         |       |                                     |          |         |        |                                     |          |         |        |                                     |          |         |        |                                     |          |         |        |                                     |          |         |        |                                                   |         |         |       |                                                   |         |         |       |                                                   |         |         |       |                                                   |         |         |       |                                                   |         |         |       |
| timepointpost:Sterne_rep4                         | 0.14746                                                                                                                                                                                                                                                                                                                                                                                                                                                                                                                                                                                                                                                                                                                                                                                                                                                                                                                                                                                                                                                                                                                                                                                                                                                                                                                                                                                                                                                                                                                                                                                                                                                                                                                                                                                                                                                                                                                                                                                                                                                                                                                                                                                                                                                                                                                                                                                                                                                                                                                                                                                                                                                                                                                                                                                                                                          | 0.07177     | 2.055        |             |            |         |             |          |          |        |               |           |          |         |                         |           |          |        |             |           |          |        |             |           |          |        |             |           |          |        |             |           |          |        |             |           |          |        |                                       |          |          |       |                           |          |          |       |                           |          |          |       |                           |           |          |        |                           |           |          |        |                           |           |          |        |                                                                                                                                                                                                                                                                                                                                                                                                                                                                                                                                                                                                                                                                                                                                                                                                                                                                                                                                                                                                                                                                                                                                                                                                                                                                                                                                                                                                                                                                                                                                                                                                                                |          |          |          |                                     |          |             |          |                                     |          |               |          |                                     |          |                         |          |                                     |          |             |           |                                                   |           |             |           |                                                   |           |             |          |                                                   |           |             |          |                                                   |           |             |          |                                                   |           |                                       |           |                                                                                                                                                                                                                                                                                                                                                                                                                                                                                                                                                                                                                                                                                                                                                                                                                                                                                                                                                                                                                                                                                                                                                                                                                                                                                                                                                                                                                                                                                                                                                                                                                                                                                                                                                                                                                                                                                                                                                                                                                                                                                                                                                                                                                                                                                                                                                                                                                                                                                                                                                                                                                                                                                                                                                                      |        |                           |           |            |         |                           |           |          |         |                           |           |          |        |                           |          |          |       |                           |          |          |       |             |          |         |        |             |         |         |       |             |         |         |       |             |         |         |       |                                       |          |         |        |                           |          |         |         |                           |          |         |        |                           |          |         |        |                           |         |         |       |                           |         |         |       |                                     |          |         |        |                                     |          |         |        |                                     |          |         |        |                                     |          |         |        |                                     |          |         |        |                                                   |         |         |       |                                                   |         |         |       |                                                   |         |         |       |                                                   |         |         |       |                                                   |         |         |       |
| timepointpost:Sterne_rep5                         | 0.42873                                                                                                                                                                                                                                                                                                                                                                                                                                                                                                                                                                                                                                                                                                                                                                                                                                                                                                                                                                                                                                                                                                                                                                                                                                                                                                                                                                                                                                                                                                                                                                                                                                                                                                                                                                                                                                                                                                                                                                                                                                                                                                                                                                                                                                                                                                                                                                                                                                                                                                                                                                                                                                                                                                                                                                                                                                          | 0.07166     | 5.983        |             |            |         |             |          |          |        |               |           |          |         |                         |           |          |        |             |           |          |        |             |           |          |        |             |           |          |        |             |           |          |        |             |           |          |        |                                       |          |          |       |                           |          |          |       |                           |          |          |       |                           |           |          |        |                           |           |          |        |                           |           |          |        |                                                                                                                                                                                                                                                                                                                                                                                                                                                                                                                                                                                                                                                                                                                                                                                                                                                                                                                                                                                                                                                                                                                                                                                                                                                                                                                                                                                                                                                                                                                                                                                                                                |          |          |          |                                     |          |             |          |                                     |          |               |          |                                     |          |                         |          |                                     |          |             |           |                                                   |           |             |           |                                                   |           |             |          |                                                   |           |             |          |                                                   |           |             |          |                                                   |           |                                       |           |                                                                                                                                                                                                                                                                                                                                                                                                                                                                                                                                                                                                                                                                                                                                                                                                                                                                                                                                                                                                                                                                                                                                                                                                                                                                                                                                                                                                                                                                                                                                                                                                                                                                                                                                                                                                                                                                                                                                                                                                                                                                                                                                                                                                                                                                                                                                                                                                                                                                                                                                                                                                                                                                                                                                                                      |        |                           |           |            |         |                           |           |          |         |                           |           |          |        |                           |          |          |       |                           |          |          |       |             |          |         |        |             |         |         |       |             |         |         |       |             |         |         |       |                                       |          |         |        |                           |          |         |         |                           |          |         |        |                           |          |         |        |                           |         |         |       |                           |         |         |       |                                     |          |         |        |                                     |          |         |        |                                     |          |         |        |                                     |          |         |        |                                     |          |         |        |                                                   |         |         |       |                                                   |         |         |       |                                                   |         |         |       |                                                   |         |         |       |                                                   |         |         |       |
| meal_cat_corr_2021VEG*N:Sterne_rep1               | -0.07957                                                                                                                                                                                                                                                                                                                                                                                                                                                                                                                                                                                                                                                                                                                                                                                                                                                                                                                                                                                                                                                                                                                                                                                                                                                                                                                                                                                                                                                                                                                                                                                                                                                                                                                                                                                                                                                                                                                                                                                                                                                                                                                                                                                                                                                                                                                                                                                                                                                                                                                                                                                                                                                                                                                                                                                                                                         | 0.11592     | -0.686       |             |            |         |             |          |          |        |               |           |          |         |                         |           |          |        |             |           |          |        |             |           |          |        |             |           |          |        |             |           |          |        |             |           |          |        |                                       |          |          |       |                           |          |          |       |                           |          |          |       |                           |           |          |        |                           |           |          |        |                           |           |          |        |                                                                                                                                                                                                                                                                                                                                                                                                                                                                                                                                                                                                                                                                                                                                                                                                                                                                                                                                                                                                                                                                                                                                                                                                                                                                                                                                                                                                                                                                                                                                                                                                                                |          |          |          |                                     |          |             |          |                                     |          |               |          |                                     |          |                         |          |                                     |          |             |           |                                                   |           |             |           |                                                   |           |             |          |                                                   |           |             |          |                                                   |           |             |          |                                                   |           |                                       |           |                                                                                                                                                                                                                                                                                                                                                                                                                                                                                                                                                                                                                                                                                                                                                                                                                                                                                                                                                                                                                                                                                                                                                                                                                                                                                                                                                                                                                                                                                                                                                                                                                                                                                                                                                                                                                                                                                                                                                                                                                                                                                                                                                                                                                                                                                                                                                                                                                                                                                                                                                                                                                                                                                                                                                                      |        |                           |           |            |         |                           |           |          |         |                           |           |          |        |                           |          |          |       |                           |          |          |       |             |          |         |        |             |         |         |       |             |         |         |       |             |         |         |       |                                       |          |         |        |                           |          |         |         |                           |          |         |        |                           |          |         |        |                           |         |         |       |                           |         |         |       |                                     |          |         |        |                                     |          |         |        |                                     |          |         |        |                                     |          |         |        |                                     |          |         |        |                                                   |         |         |       |                                                   |         |         |       |                                                   |         |         |       |                                                   |         |         |       |                                                   |         |         |       |
| meal_cat_corr_2021VEG*N:Sterne_rep2               | -0.04480                                                                                                                                                                                                                                                                                                                                                                                                                                                                                                                                                                                                                                                                                                                                                                                                                                                                                                                                                                                                                                                                                                                                                                                                                                                                                                                                                                                                                                                                                                                                                                                                                                                                                                                                                                                                                                                                                                                                                                                                                                                                                                                                                                                                                                                                                                                                                                                                                                                                                                                                                                                                                                                                                                                                                                                                                                         | 0.11402     | -0.393       |             |            |         |             |          |          |        |               |           |          |         |                         |           |          |        |             |           |          |        |             |           |          |        |             |           |          |        |             |           |          |        |             |           |          |        |                                       |          |          |       |                           |          |          |       |                           |          |          |       |                           |           |          |        |                           |           |          |        |                           |           |          |        |                                                                                                                                                                                                                                                                                                                                                                                                                                                                                                                                                                                                                                                                                                                                                                                                                                                                                                                                                                                                                                                                                                                                                                                                                                                                                                                                                                                                                                                                                                                                                                                                                                |          |          |          |                                     |          |             |          |                                     |          |               |          |                                     |          |                         |          |                                     |          |             |           |                                                   |           |             |           |                                                   |           |             |          |                                                   |           |             |          |                                                   |           |             |          |                                                   |           |                                       |           |                                                                                                                                                                                                                                                                                                                                                                                                                                                                                                                                                                                                                                                                                                                                                                                                                                                                                                                                                                                                                                                                                                                                                                                                                                                                                                                                                                                                                                                                                                                                                                                                                                                                                                                                                                                                                                                                                                                                                                                                                                                                                                                                                                                                                                                                                                                                                                                                                                                                                                                                                                                                                                                                                                                                                                      |        |                           |           |            |         |                           |           |          |         |                           |           |          |        |                           |          |          |       |                           |          |          |       |             |          |         |        |             |         |         |       |             |         |         |       |             |         |         |       |                                       |          |         |        |                           |          |         |         |                           |          |         |        |                           |          |         |        |                           |         |         |       |                           |         |         |       |                                     |          |         |        |                                     |          |         |        |                                     |          |         |        |                                     |          |         |        |                                     |          |         |        |                                                   |         |         |       |                                                   |         |         |       |                                                   |         |         |       |                                                   |         |         |       |                                                   |         |         |       |
| meal_cat_corr_2021VEG*N:Sterne_rep3               | -0.12283                                                                                                                                                                                                                                                                                                                                                                                                                                                                                                                                                                                                                                                                                                                                                                                                                                                                                                                                                                                                                                                                                                                                                                                                                                                                                                                                                                                                                                                                                                                                                                                                                                                                                                                                                                                                                                                                                                                                                                                                                                                                                                                                                                                                                                                                                                                                                                                                                                                                                                                                                                                                                                                                                                                                                                                                                                         | 0.10123     | -1.213       |             |            |         |             |          |          |        |               |           |          |         |                         |           |          |        |             |           |          |        |             |           |          |        |             |           |          |        |             |           |          |        |             |           |          |        |                                       |          |          |       |                           |          |          |       |                           |          |          |       |                           |           |          |        |                           |           |          |        |                           |           |          |        |                                                                                                                                                                                                                                                                                                                                                                                                                                                                                                                                                                                                                                                                                                                                                                                                                                                                                                                                                                                                                                                                                                                                                                                                                                                                                                                                                                                                                                                                                                                                                                                                                                |          |          |          |                                     |          |             |          |                                     |          |               |          |                                     |          |                         |          |                                     |          |             |           |                                                   |           |             |           |                                                   |           |             |          |                                                   |           |             |          |                                                   |           |             |          |                                                   |           |                                       |           |                                                                                                                                                                                                                                                                                                                                                                                                                                                                                                                                                                                                                                                                                                                                                                                                                                                                                                                                                                                                                                                                                                                                                                                                                                                                                                                                                                                                                                                                                                                                                                                                                                                                                                                                                                                                                                                                                                                                                                                                                                                                                                                                                                                                                                                                                                                                                                                                                                                                                                                                                                                                                                                                                                                                                                      |        |                           |           |            |         |                           |           |          |         |                           |           |          |        |                           |          |          |       |                           |          |          |       |             |          |         |        |             |         |         |       |             |         |         |       |             |         |         |       |                                       |          |         |        |                           |          |         |         |                           |          |         |        |                           |          |         |        |                           |         |         |       |                           |         |         |       |                                     |          |         |        |                                     |          |         |        |                                     |          |         |        |                                     |          |         |        |                                     |          |         |        |                                                   |         |         |       |                                                   |         |         |       |                                                   |         |         |       |                                                   |         |         |       |                                                   |         |         |       |
| meal_cat_corr_2021VEG*N:Sterne_rep4               | -0.08433                                                                                                                                                                                                                                                                                                                                                                                                                                                                                                                                                                                                                                                                                                                                                                                                                                                                                                                                                                                                                                                                                                                                                                                                                                                                                                                                                                                                                                                                                                                                                                                                                                                                                                                                                                                                                                                                                                                                                                                                                                                                                                                                                                                                                                                                                                                                                                                                                                                                                                                                                                                                                                                                                                                                                                                                                                         | 0.09835     | -0.857       |             |            |         |             |          |          |        |               |           |          |         |                         |           |          |        |             |           |          |        |             |           |          |        |             |           |          |        |             |           |          |        |             |           |          |        |                                       |          |          |       |                           |          |          |       |                           |          |          |       |                           |           |          |        |                           |           |          |        |                           |           |          |        |                                                                                                                                                                                                                                                                                                                                                                                                                                                                                                                                                                                                                                                                                                                                                                                                                                                                                                                                                                                                                                                                                                                                                                                                                                                                                                                                                                                                                                                                                                                                                                                                                                |          |          |          |                                     |          |             |          |                                     |          |               |          |                                     |          |                         |          |                                     |          |             |           |                                                   |           |             |           |                                                   |           |             |          |                                                   |           |             |          |                                                   |           |             |          |                                                   |           |                                       |           |                                                                                                                                                                                                                                                                                                                                                                                                                                                                                                                                                                                                                                                                                                                                                                                                                                                                                                                                                                                                                                                                                                                                                                                                                                                                                                                                                                                                                                                                                                                                                                                                                                                                                                                                                                                                                                                                                                                                                                                                                                                                                                                                                                                                                                                                                                                                                                                                                                                                                                                                                                                                                                                                                                                                                                      |        |                           |           |            |         |                           |           |          |         |                           |           |          |        |                           |          |          |       |                           |          |          |       |             |          |         |        |             |         |         |       |             |         |         |       |             |         |         |       |                                       |          |         |        |                           |          |         |         |                           |          |         |        |                           |          |         |        |                           |         |         |       |                           |         |         |       |                                     |          |         |        |                                     |          |         |        |                                     |          |         |        |                                     |          |         |        |                                     |          |         |        |                                                   |         |         |       |                                                   |         |         |       |                                                   |         |         |       |                                                   |         |         |       |                                                   |         |         |       |
| meal_cat_corr_2021VEG*N:Sterne_rep5               | -0.11195                                                                                                                                                                                                                                                                                                                                                                                                                                                                                                                                                                                                                                                                                                                                                                                                                                                                                                                                                                                                                                                                                                                                                                                                                                                                                                                                                                                                                                                                                                                                                                                                                                                                                                                                                                                                                                                                                                                                                                                                                                                                                                                                                                                                                                                                                                                                                                                                                                                                                                                                                                                                                                                                                                                                                                                                                                         | 0.09823     | -1.140       |             |            |         |             |          |          |        |               |           |          |         |                         |           |          |        |             |           |          |        |             |           |          |        |             |           |          |        |             |           |          |        |             |           |          |        |                                       |          |          |       |                           |          |          |       |                           |          |          |       |                           |           |          |        |                           |           |          |        |                           |           |          |        |                                                                                                                                                                                                                                                                                                                                                                                                                                                                                                                                                                                                                                                                                                                                                                                                                                                                                                                                                                                                                                                                                                                                                                                                                                                                                                                                                                                                                                                                                                                                                                                                                                |          |          |          |                                     |          |             |          |                                     |          |               |          |                                     |          |                         |          |                                     |          |             |           |                                                   |           |             |           |                                                   |           |             |          |                                                   |           |             |          |                                                   |           |             |          |                                                   |           |                                       |           |                                                                                                                                                                                                                                                                                                                                                                                                                                                                                                                                                                                                                                                                                                                                                                                                                                                                                                                                                                                                                                                                                                                                                                                                                                                                                                                                                                                                                                                                                                                                                                                                                                                                                                                                                                                                                                                                                                                                                                                                                                                                                                                                                                                                                                                                                                                                                                                                                                                                                                                                                                                                                                                                                                                                                                      |        |                           |           |            |         |                           |           |          |         |                           |           |          |        |                           |          |          |       |                           |          |          |       |             |          |         |        |             |         |         |       |             |         |         |       |             |         |         |       |                                       |          |         |        |                           |          |         |         |                           |          |         |        |                           |          |         |        |                           |         |         |       |                           |         |         |       |                                     |          |         |        |                                     |          |         |        |                                     |          |         |        |                                     |          |         |        |                                     |          |         |        |                                                   |         |         |       |                                                   |         |         |       |                                                   |         |         |       |                                                   |         |         |       |                                                   |         |         |       |
| timepointpost:meal_cat_corr_2021VEG*N:Sterne_rep1 | 0.34844                                                                                                                                                                                                                                                                                                                                                                                                                                                                                                                                                                                                                                                                                                                                                                                                                                                                                                                                                                                                                                                                                                                                                                                                                                                                                                                                                                                                                                                                                                                                                                                                                                                                                                                                                                                                                                                                                                                                                                                                                                                                                                                                                                                                                                                                                                                                                                                                                                                                                                                                                                                                                                                                                                                                                                                                                                          | 0.12723     | 2.739        |             |            |         |             |          |          |        |               |           |          |         |                         |           |          |        |             |           |          |        |             |           |          |        |             |           |          |        |             |           |          |        |             |           |          |        |                                       |          |          |       |                           |          |          |       |                           |          |          |       |                           |           |          |        |                           |           |          |        |                           |           |          |        |                                                                                                                                                                                                                                                                                                                                                                                                                                                                                                                                                                                                                                                                                                                                                                                                                                                                                                                                                                                                                                                                                                                                                                                                                                                                                                                                                                                                                                                                                                                                                                                                                                |          |          |          |                                     |          |             |          |                                     |          |               |          |                                     |          |                         |          |                                     |          |             |           |                                                   |           |             |           |                                                   |           |             |          |                                                   |           |             |          |                                                   |           |             |          |                                                   |           |                                       |           |                                                                                                                                                                                                                                                                                                                                                                                                                                                                                                                                                                                                                                                                                                                                                                                                                                                                                                                                                                                                                                                                                                                                                                                                                                                                                                                                                                                                                                                                                                                                                                                                                                                                                                                                                                                                                                                                                                                                                                                                                                                                                                                                                                                                                                                                                                                                                                                                                                                                                                                                                                                                                                                                                                                                                                      |        |                           |           |            |         |                           |           |          |         |                           |           |          |        |                           |          |          |       |                           |          |          |       |             |          |         |        |             |         |         |       |             |         |         |       |             |         |         |       |                                       |          |         |        |                           |          |         |         |                           |          |         |        |                           |          |         |        |                           |         |         |       |                           |         |         |       |                                     |          |         |        |                                     |          |         |        |                                     |          |         |        |                                     |          |         |        |                                     |          |         |        |                                                   |         |         |       |                                                   |         |         |       |                                                   |         |         |       |                                                   |         |         |       |                                                   |         |         |       |
| timepointpost:meal_cat_corr_2021VEG*N:Sterne_rep2 | 0.01066                                                                                                                                                                                                                                                                                                                                                                                                                                                                                                                                                                                                                                                                                                                                                                                                                                                                                                                                                                                                                                                                                                                                                                                                                                                                                                                                                                                                                                                                                                                                                                                                                                                                                                                                                                                                                                                                                                                                                                                                                                                                                                                                                                                                                                                                                                                                                                                                                                                                                                                                                                                                                                                                                                                                                                                                                                          | 0.12502     | 0.085        |             |            |         |             |          |          |        |               |           |          |         |                         |           |          |        |             |           |          |        |             |           |          |        |             |           |          |        |             |           |          |        |             |           |          |        |                                       |          |          |       |                           |          |          |       |                           |          |          |       |                           |           |          |        |                           |           |          |        |                           |           |          |        |                                                                                                                                                                                                                                                                                                                                                                                                                                                                                                                                                                                                                                                                                                                                                                                                                                                                                                                                                                                                                                                                                                                                                                                                                                                                                                                                                                                                                                                                                                                                                                                                                                |          |          |          |                                     |          |             |          |                                     |          |               |          |                                     |          |                         |          |                                     |          |             |           |                                                   |           |             |           |                                                   |           |             |          |                                                   |           |             |          |                                                   |           |             |          |                                                   |           |                                       |           |                                                                                                                                                                                                                                                                                                                                                                                                                                                                                                                                                                                                                                                                                                                                                                                                                                                                                                                                                                                                                                                                                                                                                                                                                                                                                                                                                                                                                                                                                                                                                                                                                                                                                                                                                                                                                                                                                                                                                                                                                                                                                                                                                                                                                                                                                                                                                                                                                                                                                                                                                                                                                                                                                                                                                                      |        |                           |           |            |         |                           |           |          |         |                           |           |          |        |                           |          |          |       |                           |          |          |       |             |          |         |        |             |         |         |       |             |         |         |       |             |         |         |       |                                       |          |         |        |                           |          |         |         |                           |          |         |        |                           |          |         |        |                           |         |         |       |                           |         |         |       |                                     |          |         |        |                                     |          |         |        |                                     |          |         |        |                                     |          |         |        |                                     |          |         |        |                                                   |         |         |       |                                                   |         |         |       |                                                   |         |         |       |                                                   |         |         |       |                                                   |         |         |       |
| timepointpost:meal_cat_corr_2021VEG*N:Sterne_rep3 | 0.13271                                                                                                                                                                                                                                                                                                                                                                                                                                                                                                                                                                                                                                                                                                                                                                                                                                                                                                                                                                                                                                                                                                                                                                                                                                                                                                                                                                                                                                                                                                                                                                                                                                                                                                                                                                                                                                                                                                                                                                                                                                                                                                                                                                                                                                                                                                                                                                                                                                                                                                                                                                                                                                                                                                                                                                                                                                          | 0.11102     | 1.195        |             |            |         |             |          |          |        |               |           |          |         |                         |           |          |        |             |           |          |        |             |           |          |        |             |           |          |        |             |           |          |        |             |           |          |        |                                       |          |          |       |                           |          |          |       |                           |          |          |       |                           |           |          |        |                           |           |          |        |                           |           |          |        |                                                                                                                                                                                                                                                                                                                                                                                                                                                                                                                                                                                                                                                                                                                                                                                                                                                                                                                                                                                                                                                                                                                                                                                                                                                                                                                                                                                                                                                                                                                                                                                                                                |          |          |          |                                     |          |             |          |                                     |          |               |          |                                     |          |                         |          |                                     |          |             |           |                                                   |           |             |           |                                                   |           |             |          |                                                   |           |             |          |                                                   |           |             |          |                                                   |           |                                       |           |                                                                                                                                                                                                                                                                                                                                                                                                                                                                                                                                                                                                                                                                                                                                                                                                                                                                                                                                                                                                                                                                                                                                                                                                                                                                                                                                                                                                                                                                                                                                                                                                                                                                                                                                                                                                                                                                                                                                                                                                                                                                                                                                                                                                                                                                                                                                                                                                                                                                                                                                                                                                                                                                                                                                                                      |        |                           |           |            |         |                           |           |          |         |                           |           |          |        |                           |          |          |       |                           |          |          |       |             |          |         |        |             |         |         |       |             |         |         |       |             |         |         |       |                                       |          |         |        |                           |          |         |         |                           |          |         |        |                           |          |         |        |                           |         |         |       |                           |         |         |       |                                     |          |         |        |                                     |          |         |        |                                     |          |         |        |                                     |          |         |        |                                     |          |         |        |                                                   |         |         |       |                                                   |         |         |       |                                                   |         |         |       |                                                   |         |         |       |                                                   |         |         |       |
| timepointpost:meal_cat_corr_2021VEG*N:Sterne_rep4 | 0.07308                                                                                                                                                                                                                                                                                                                                                                                                                                                                                                                                                                                                                                                                                                                                                                                                                                                                                                                                                                                                                                                                                                                                                                                                                                                                                                                                                                                                                                                                                                                                                                                                                                                                                                                                                                                                                                                                                                                                                                                                                                                                                                                                                                                                                                                                                                                                                                                                                                                                                                                                                                                                                                                                                                                                                                                                                                          | 0.10790     | 0.677        |             |            |         |             |          |          |        |               |           |          |         |                         |           |          |        |             |           |          |        |             |           |          |        |             |           |          |        |             |           |          |        |             |           |          |        |                                       |          |          |       |                           |          |          |       |                           |          |          |       |                           |           |          |        |                           |           |          |        |                           |           |          |        |                                                                                                                                                                                                                                                                                                                                                                                                                                                                                                                                                                                                                                                                                                                                                                                                                                                                                                                                                                                                                                                                                                                                                                                                                                                                                                                                                                                                                                                                                                                                                                                                                                |          |          |          |                                     |          |             |          |                                     |          |               |          |                                     |          |                         |          |                                     |          |             |           |                                                   |           |             |           |                                                   |           |             |          |                                                   |           |             |          |                                                   |           |             |          |                                                   |           |                                       |           |                                                                                                                                                                                                                                                                                                                                                                                                                                                                                                                                                                                                                                                                                                                                                                                                                                                                                                                                                                                                                                                                                                                                                                                                                                                                                                                                                                                                                                                                                                                                                                                                                                                                                                                                                                                                                                                                                                                                                                                                                                                                                                                                                                                                                                                                                                                                                                                                                                                                                                                                                                                                                                                                                                                                                                      |        |                           |           |            |         |                           |           |          |         |                           |           |          |        |                           |          |          |       |                           |          |          |       |             |          |         |        |             |         |         |       |             |         |         |       |             |         |         |       |                                       |          |         |        |                           |          |         |         |                           |          |         |        |                           |          |         |        |                           |         |         |       |                           |         |         |       |                                     |          |         |        |                                     |          |         |        |                                     |          |         |        |                                     |          |         |        |                                     |          |         |        |                                                   |         |         |       |                                                   |         |         |       |                                                   |         |         |       |                                                   |         |         |       |                                                   |         |         |       |
| timepointpost:meal_cat_corr_2021VEG*N:Sterne_rep5 | 0.05756                                                                                                                                                                                                                                                                                                                                                                                                                                                                                                                                                                                                                                                                                                                                                                                                                                                                                                                                                                                                                                                                                                                                                                                                                                                                                                                                                                                                                                                                                                                                                                                                                                                                                                                                                                                                                                                                                                                                                                                                                                                                                                                                                                                                                                                                                                                                                                                                                                                                                                                                                                                                                                                                                                                                                                                                                                          | 0.10779     | 0.534        |             |            |         |             |          |          |        |               |           |          |         |                         |           |          |        |             |           |          |        |             |           |          |        |             |           |          |        |             |           |          |        |             |           |          |        |                                       |          |          |       |                           |          |          |       |                           |          |          |       |                           |           |          |        |                           |           |          |        |                           |           |          |        |                                                                                                                                                                                                                                                                                                                                                                                                                                                                                                                                                                                                                                                                                                                                                                                                                                                                                                                                                                                                                                                                                                                                                                                                                                                                                                                                                                                                                                                                                                                                                                                                                                |          |          |          |                                     |          |             |          |                                     |          |               |          |                                     |          |                         |          |                                     |          |             |           |                                                   |           |             |           |                                                   |           |             |          |                                                   |           |             |          |                                                   |           |             |          |                                                   |           |                                       |           |                                                                                                                                                                                                                                                                                                                                                                                                                                                                                                                                                                                                                                                                                                                                                                                                                                                                                                                                                                                                                                                                                                                                                                                                                                                                                                                                                                                                                                                                                                                                                                                                                                                                                                                                                                                                                                                                                                                                                                                                                                                                                                                                                                                                                                                                                                                                                                                                                                                                                                                                                                                                                                                                                                                                                                      |        |                           |           |            |         |                           |           |          |         |                           |           |          |        |                           |          |          |       |                           |          |          |       |             |          |         |        |             |         |         |       |             |         |         |       |             |         |         |       |                                       |          |         |        |                           |          |         |         |                           |          |         |        |                           |          |         |        |                           |         |         |       |                           |         |         |       |                                     |          |         |        |                                     |          |         |        |                                     |          |         |        |                                     |          |         |        |                                     |          |         |        |                                                   |         |         |       |                                                   |         |         |       |                                                   |         |         |       |                                                   |         |         |       |                                                   |         |         |       |

Significant effects between linear mixed models model comparisons are marked in bold.

SI Table 3: Interaction effects of meal category on hunger and mood for subgroups by gender (app study only).

|                                | hunger                                                                           |             | mood                                                                                            |             |
|--------------------------------|----------------------------------------------------------------------------------|-------------|-------------------------------------------------------------------------------------------------|-------------|
| app-based (5-point)            | animal-based                                                                     | plant-based | animal-based                                                                                    | plant-based |
| <b>male (n = 8291)</b>         |                                                                                  |             |                                                                                                 |             |
| interaction effect tp*meal_cat | post-meal*plant-based: b = 0.07, t = 2.2<br>model comparison<br><b>p = 0.031</b> |             | post-meal*plant-based: b = -0.07, t = -2.8<br>model comparison<br><b>p = 0.005</b>              |             |
| main effect meal_cat           | plant-based: b = -0.01, t = -0.6<br>model comparison<br>p < 0.53                 |             | plant-based: b < 0.01, t = 0.05<br>model comparison<br>p = 0.96                                 |             |
| <b>female (n = 7418)</b>       |                                                                                  |             |                                                                                                 |             |
| interaction effect tp*meal_cat | post-meal*plant-based: b = 0.09, t = 3.0<br>model comparison<br><b>p = 0.003</b> |             | post-meal*plant-based: b = -0.1, t = -4.1<br>model comparison<br><b>p = 4.1x10<sup>-5</sup></b> |             |
| main effect meal_cat           | plant-based: b = -0.07, t = -3.6<br>model comparison<br><b>p = 0.0004</b>        |             | plant-based: b = 0.02, t = 0.9<br>model comparison<br>p = 0.38                                  |             |
| <b>diverse (n = 279)</b>       |                                                                                  |             |                                                                                                 |             |
| interaction effect tp*meal_cat | post-meal*plant-based: b = -0.08, t = -0.4<br>model comparison<br>p = 0.70       |             | post-meal*plant-based: b = 0.35, t = 1.8<br>model comparison<br>p = 0.08                        |             |
| main effect meal_cat           | plant-based: b = -0.2, t = -1.6<br>model comparison<br>p = 0.12                  |             | plant-based: b = 0.01, t = 0.04<br>model comparison<br>p = 0.96                                 |             |

*Significant effects between linear mixed models model comparisons are marked in bold.*

SI Table 4: Interaction effects of meal category on hunger and mood for subgroups according to dietary adherence (app study only).

|                                                | hunger                                                                                                   |             | mood                                                                                                   |             |
|------------------------------------------------|----------------------------------------------------------------------------------------------------------|-------------|--------------------------------------------------------------------------------------------------------|-------------|
| app-based<br>(5-point)<br>n = 16135 valid      | animal-based                                                                                             | plant-based | animal-based                                                                                           | plant-based |
| <b>omnivorous only (n = 11600)</b>             |                                                                                                          |             |                                                                                                        |             |
| interaction effect<br>tp*meal_cat              | post-meal*plant-based: b = 0.109, t = 3.8<br><br>model comparison<br><b>p = 0.0001</b>                   |             | post-meal*plant-based: b = -0.10, t = -4.4<br><br>model comparison<br><b>p = 0.0000114</b>             |             |
| double interaction effect<br>tp*taste          | post-meal*5stars: b = -0.38, t = -4.5<br><br>model comparison<br><b>p &lt; 2.2x10<sup>-16</sup></b>      |             | post-meal*5stars: b = 0.45, t = 7.3<br><br>model comparison<br><b>p &lt; 2.2x10<sup>-16</sup></b>      |             |
| triple interaction effect<br>tp*meal_cat*taste | post-meal*plant-based*5stars: b = -0.15, t = -0.8<br><br>model comparison<br>p = 0.71                    |             | post-meal*plant-based*5stars: b = 0.18, t = 1.4<br><br>model comparison<br><b>p = 0.035</b>            |             |
| <b>vegetarian only (n = 3456)</b>              |                                                                                                          |             |                                                                                                        |             |
| interaction effect<br>tp*meal_cat              | post-meal*plant-based: b = -0.03, t = -0.4<br><br>model comparison<br>p = 0.67                           |             | post-meal*plant-based: b = -0.13, t = -2.9<br><br>model comparison<br><b>p = 0.004</b>                 |             |
| double interaction effect<br>tp*taste          | post-meal*5stars: b = -0.74, t = -4.5<br><br>model comparison<br><b>p &lt; 5.1x10<sup>-15</sup></b>      |             | post-meal*5stars: b = 0.47, t = 3.9<br><br>model comparison<br><b>p &lt; 2.2x10<sup>-16</sup></b>      |             |
| triple interaction effect<br>tp*meal_cat*taste | post-meal*plant-based*5stars: b = 0.33, t = 0.8<br><br>model comparison<br><b>p = 0.005</b>              |             | post-meal*plant-based*5stars: b = -0.72, t = -2.5<br><br>model comparison<br><b>p = 0.012</b>          |             |
| <b>vegan only (n = 911)</b>                    |                                                                                                          |             |                                                                                                        |             |
| interaction effect<br>tp*meal_cat              | post-meal*plant-based: b = -0.96, t = -6.6<br><br>model comparison<br><b>p &lt; 8.3x10<sup>-11</sup></b> |             | post-meal*plant-based: b = 0.54, t = 4.5<br><br>model comparison<br><b>p &lt; 6.99x10<sup>-6</sup></b> |             |



|                                                |                                                                                                     |                                                                                                   |
|------------------------------------------------|-----------------------------------------------------------------------------------------------------|---------------------------------------------------------------------------------------------------|
| double interaction effect<br>tp*taste          | post-meal*5stars: b = -1.44, t = -4.5<br><br>model comparison<br><b>p &lt; 4.2x10<sup>-13</sup></b> | post-meal*5stars: b = 0.34, t = 1.4<br><br>model comparison<br><b>p &lt; 2.2x10<sup>-16</sup></b> |
| triple interaction effect<br>tp*meal_cat*taste | post-meal*plant-based*5stars: b = -1.4, t = -1.8<br><br>model comparison<br>p = 0.077               | post-meal*plant-based*5stars: b = 0.06, t = 0.11<br><br>model comparison<br><b>p = 0.045</b>      |

*Significant effects between linear mixed models model comparisons are marked in bold.*
